# Supplementary material
Source: PubMed Central journal article supplement (PMC3800700)
Supplement: NIHMS487411-supplement-2_si_001.pdf [file NIHMS487411-supplement-2_si_001.pdf]

# Supplementary Information

Regioselective Ruthenium Catalyzed Hydrohydroxyalkylation of Dienes with

3-Hydroxy-2-Oxindoles: Prenylation, Geranylation and Beyond

TeYu Chen, Michael J. Krische\*

University of Texas at Austin  
Department of Chemistry and Biochemistry  
Austin, TX 78712  
USA

## Table of Contents

|                                                                                          |          |
|------------------------------------------------------------------------------------------|----------|
| General Experimental Details .....                                                       | S2       |
| Experimental Details and Spectroscopic Data for 3-hydroxy-2-oxindoles <b>1a-1f</b> ..... | S3-S27   |
| Experimental Details and Spectroscopic Data for Diene <b>2f</b> .....                    | S28-S30  |
| General Experimental Details for C-C Couplings .....                                     | S31      |
| Procedure and Spectroscopic Data for 3-hydroxy-2-oxindoles <b>3a-3f</b> .....            | S32-S50  |
| Procedure and Spectroscopic Data for 3-hydroxy-2-oxindoles <b>4a-4f</b> .....            | S51-S70  |
| Procedure and Spectroscopic Data for 3-hydroxy-2-oxindoles <b>5a-5d</b> .....            | S71-S85  |
| Crystal structure of product <b>5b</b> .....                                             | S86-S101 |

### **General Experimental Details**

All reactions were run under an atmosphere of argon, unless otherwise indicated. Toluene was distilled from sodium/benzophenone and transferred via an oven-dried syringe. Reaction tubes were oven-dried and cooled under a stream of argon. Reaction tubes were purchased from Fischer Scientific (catalog number 14-959-35C).  $\text{Ru}_3(\text{CO})_{12}$  and  $\text{PCy}_3$  were used as received from commercial suppliers. 3-Hydroxy-2-oxindoles (**1a-1f**) were prepared via reduction between benzylated isatins and  $\text{NaBH}_4$ . Isoprene and dienes (**2c-2f**) were distilled immediately before each use, and myrcene was distilled after purchase from commercial suppliers. Analytical thin-layer chromatography (TLC) was carried out using 0.2-mm commercial silica gel plates (DC-Fertigplatten Kieselgel 60 F<sub>254</sub>) and products were visualized by UV,  $\text{KMnO}_4$ , magic stain and/or *p*-anisaldehyde stain. Preparative column chromatography employing silica gel was performed according to the method of Still.<sup>1</sup> Infrared spectra were recorded on a Perkin-Elmer 1600 spectrometer. High-resolution mass spectra (HRMS) were obtained on a Karatos MS9 and are reported as *m/z* (relative intensity). Accurate masses are reported for the molecular ion  $[\text{M}+\text{H}]^+$  or a suitable fragment ion. Melting points were obtained on a Thomas-Hoover Unimelt apparatus and are uncorrected. Proton and deuterium nuclear magnetic resonance (<sup>1</sup>H NMR) spectra were recorded with a Varian Gemini 400 MHz spectrometer. Chemical shifts are reported in delta ( $\delta$ ) units, parts per million (ppm) downfield from tetramethylsilane or ppm relative to the center of the singlet at 7.26 ppm for deuteriochloroform and the center of the quintet at 2.49 ppm ( $J = 1.7$  Hz) for deuteriodimethyl sulfoxide. Coupling constants are reported in Hertz (Hz). Carbon-13 nuclear magnetic resonance (<sup>13</sup>C NMR) spectra were recorded with a Varian Gemini 400 spectrometer (100 MHz). Chemical shifts are reported in delta ( $\delta$ ) units, ppm relative to the center of the triplet at 77.0 ppm for deuteriochloroform and the center of the septet at 39.5 ppm for deuteriodimethyl sulphoxide. <sup>13</sup>C NMR spectra were routinely run with broadband decoupling.

---

<sup>1</sup>Still, W. C.; Kahn, M.; Mitra, A. *J. Org. Chem.* **1978**, *43*, 2923.

## Experimental Procedures and Spectroscopic Data for Preparation of 3-Hydroxy-2-oxindole

### 1a-1e

#### 1-benzyl-3-hydroxyindolin-2-one (1a)

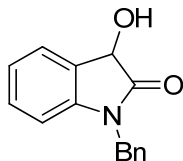

**Compound 1a:** NaBH<sub>4</sub> (1.7 mmol, 64.3 mg, 0.5 equiv) was added in small portions to a stirred suspension of commercially available 1-benzylindoline-2,3-dione (0.8 g, 3.4 mmol, 1.0 equiv) in 20.5 mL of a 1:1 dichloromethane/ethanol mixture at -30 °C. The mixture was vigorously stirred at this temperature until the suspension became colorless. Then distilled water was added and the reaction mixture was stirred until bubbling stopped. The mixture was extracted with dichloromethane (3 x 10 mL). The combined organic extracts were dried (MgSO<sub>4</sub>) and the solvent evaporated under reduced pressure. The residue was purified by chromatography on silica gel using a 4:1 mixture of dichloromethane /diethyl ether as elution solvent to give 0.4 g (50%) **1a**<sup>2</sup> as a white solid.

**<sup>1</sup>H NMR** (400 MHz, D<sub>6</sub>-DMSO): δ 7.35-7.18 (m, 7H), 7.01 (t, *J* = 7.2 Hz, 1H), 6.83 (d, *J* = 7.6 Hz, 1H), 6.35 (d, *J* = 7.6 Hz, 1H) 5.03 (d, *J* = 7.6 Hz, 1H), 4.83 (s, 2H)

**<sup>13</sup>C NMR** (100 MHz, D<sub>6</sub>-DMSO): δ 176.2, 142.6, 136.3, 128.9, 128.7, 128.6, 127.4, 127.3, 124.6, 122.3, 109.0, 68.8, 42.4

**LRMS** (CI) Calcd. For C<sub>15</sub>H<sub>12</sub>NO<sub>2</sub> [M-H]<sup>+</sup>: 238, Found: 238

**FTIR** (neat): 3461, 3261, 2251, 2113, 1650, 1049, 1023, 1005, 814, 752 cm<sup>-1</sup>

**Mp:** 140.8-141.2 °C

**TLC** (SiO<sub>2</sub>): R<sub>f</sub> = 0.1 (ethyl acetate: hexanes, 1:4)

<sup>2</sup>M. Retini, G. Bergonzinia and P. Melchiorre, *Chem. Commun.*, 2012, **48**, 3336

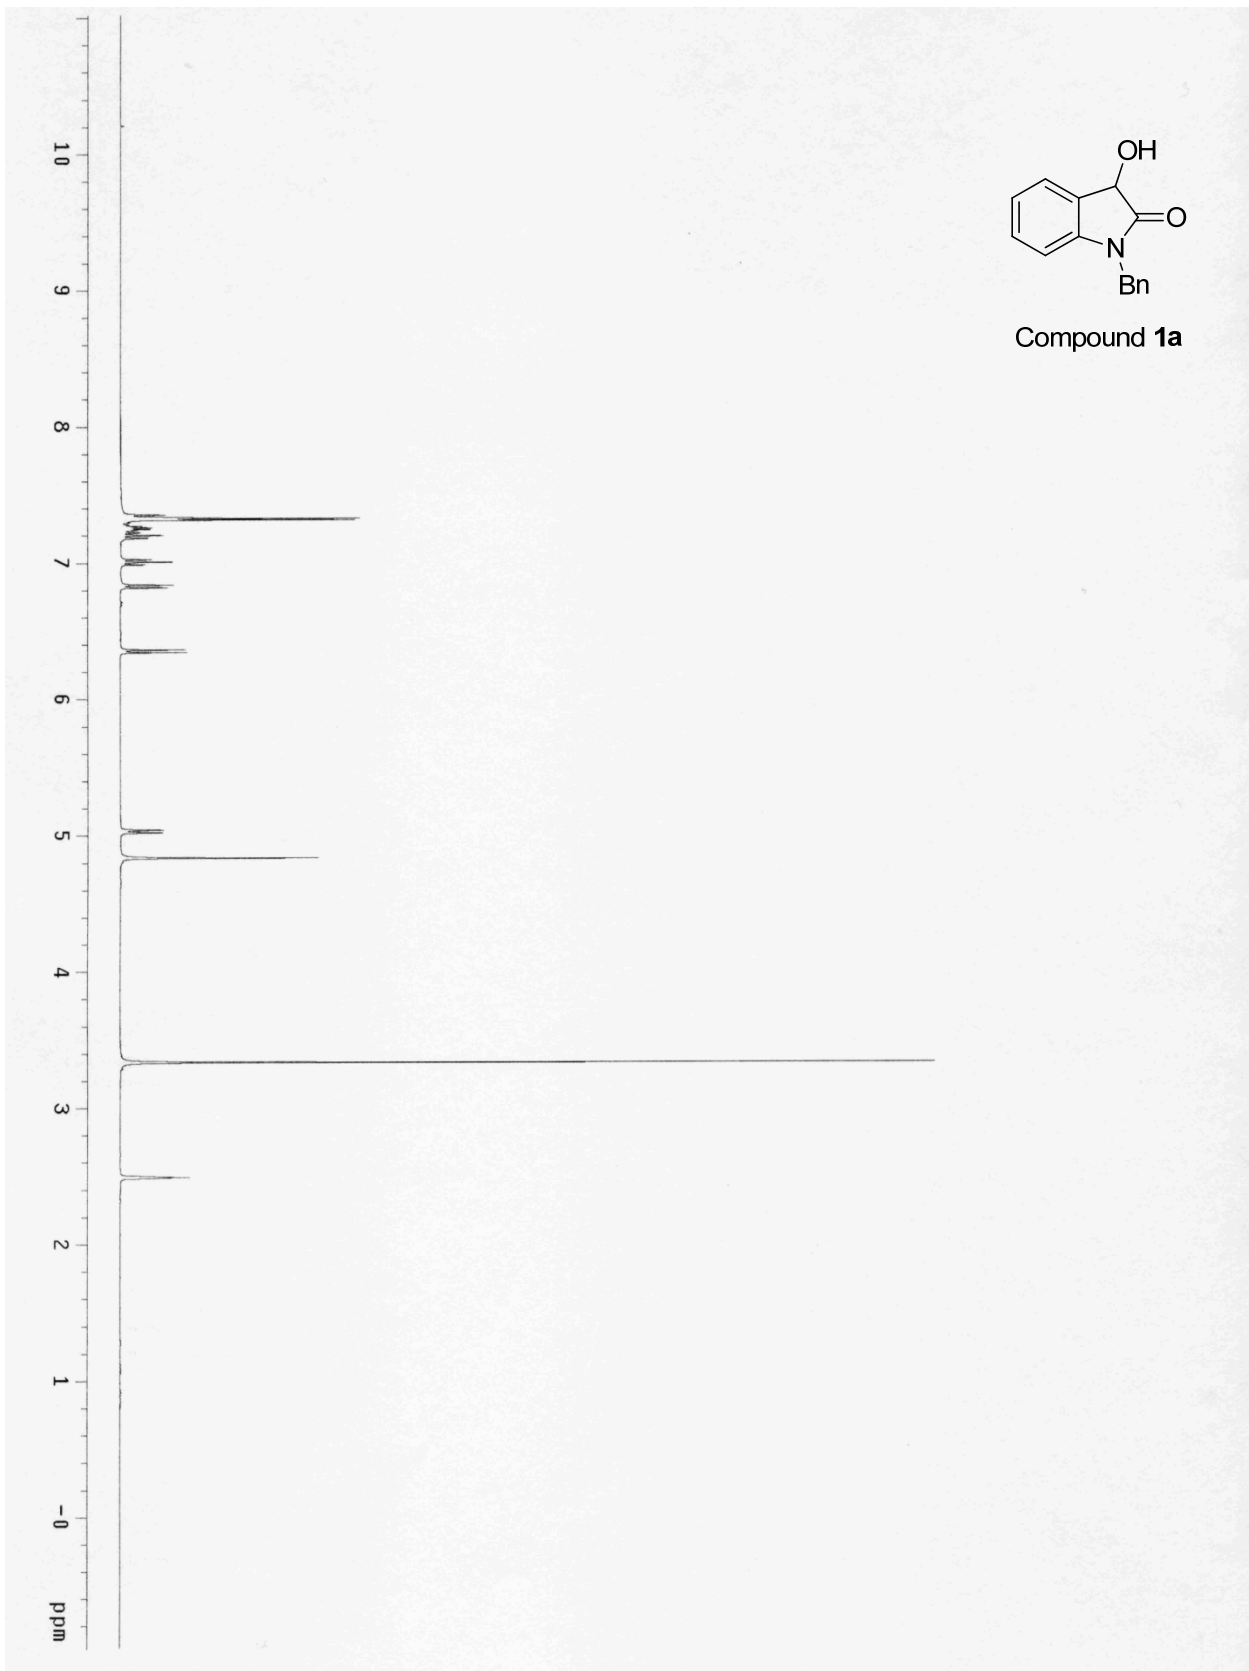

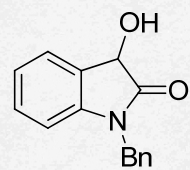

Compound **1a**

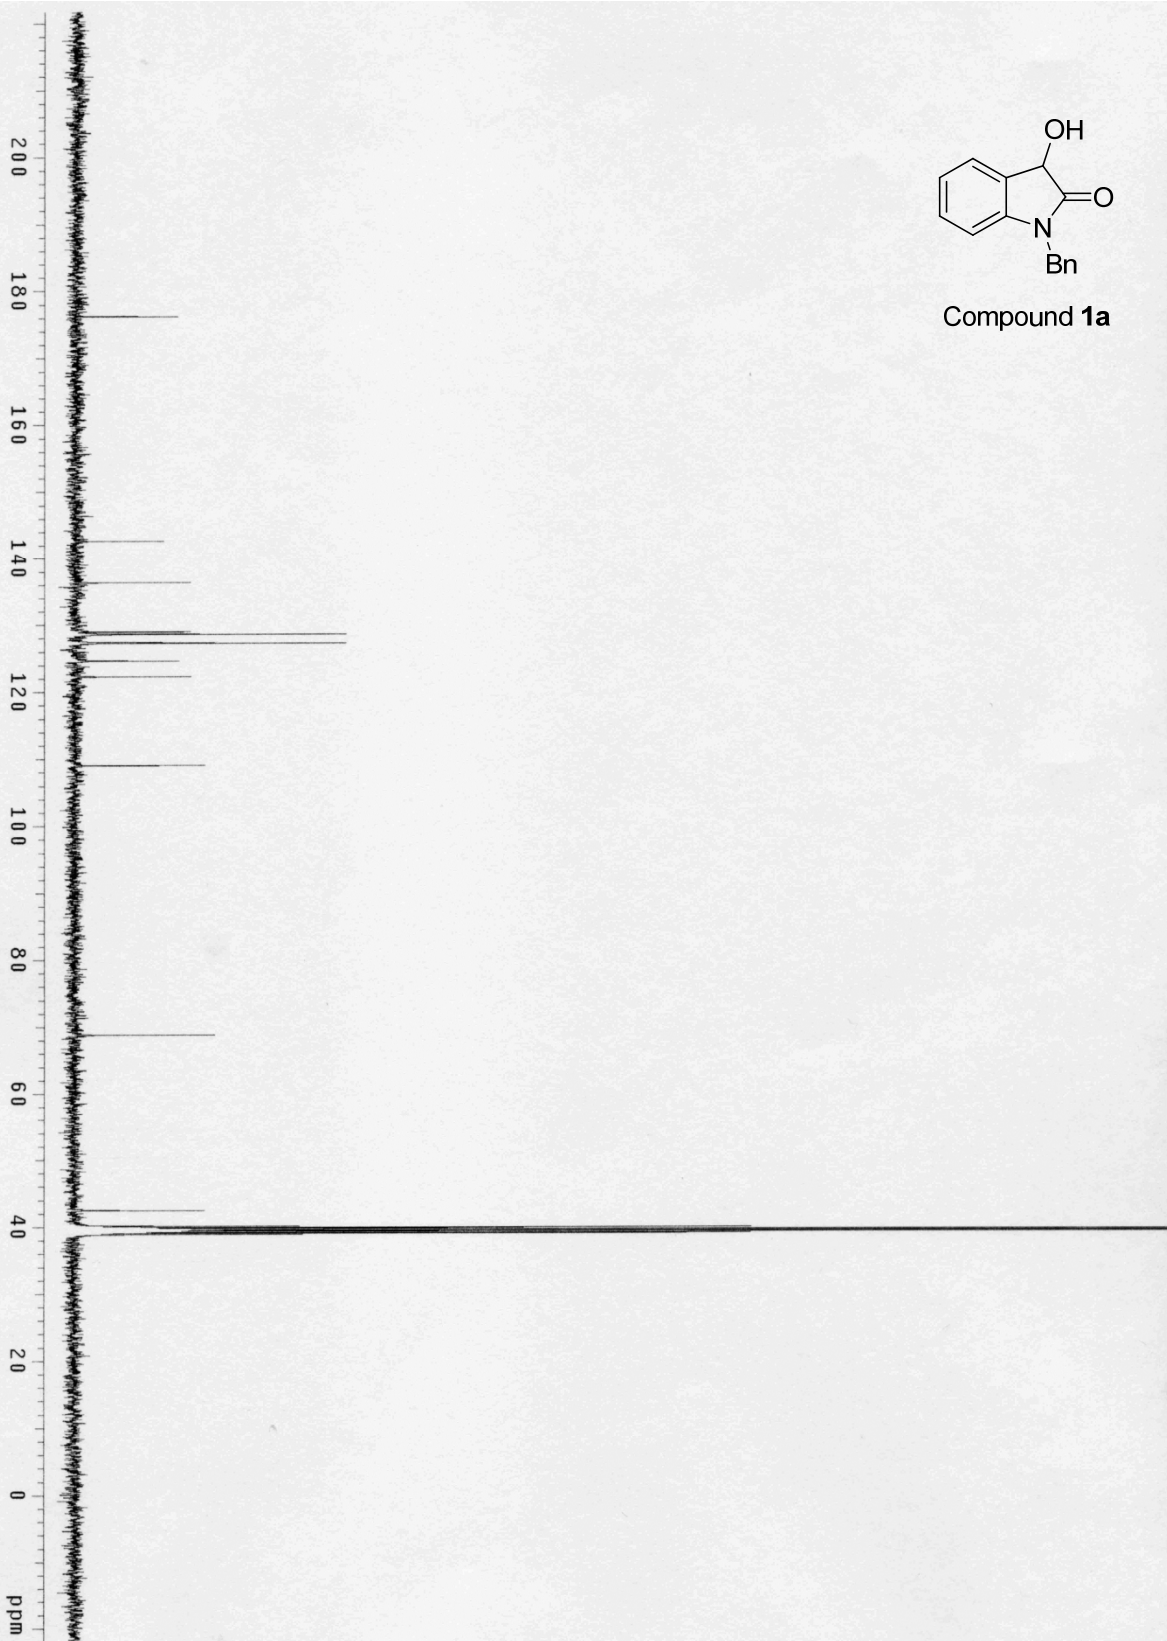

### 1-benzyl-3-hydroxy-5-methylindolin-2-one (**1b**)

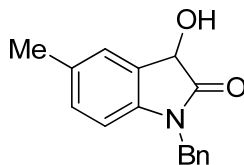

**Compound 1b:** NaBH<sub>4</sub> (2.6 mmol, 98.8 mg, 0.5 equiv) was added in small portions to a stirred suspension of commercially available 1-benzyl-5-methylindoline-2,3-dione (1.3 g, 5.2 mmol, 1.0 equiv) in 31.2 mL of a 1:1 dichloromethane/ethanol mixture at -30 °C. The mixture was vigorously stirred at this temperature until the suspension became colorless. Then distilled water was added and the reaction mixture was stirred until bubbling stop. The mixture was extracted with dichloromethane (3 x 10 mL). The combined organic extracts were dried (MgSO<sub>4</sub>) and the solvent evaporated under reduced pressure. The residue was purified by chromatography on silica gel using a 4:1 mixture of dichloromethane /diethyl ether as elution solvent to give 0.53 g (40%) **1b**<sup>3</sup> as a white solid.

**<sup>1</sup>H NMR** (400 MHz, D<sub>6</sub>-DMSO): 7.25-7.16 (m, 6H), 7.10 (s, 1H), 6.93 (d, *J* = 7.6 Hz, 1H), 6.63 (d, *J* = 8.0 Hz, 1H), 6.29 (d, *J* = 7.6 Hz 1H), 4.94 (d, *J* = 7.6 Hz, 1H), 4.75 (s, 2H), 2.17 (s, 2H)

**<sup>13</sup>C NMR** (100 MHz, D<sub>6</sub>-DMSO): δ 176.2, 140.3, 136.4, 131.3, 129.0, 128.7, 128.6, 127.3, 127.2, 125.4, 108.8, 68.9, 42.5, 20.6

**LRMS** (CI) Calcd. For C<sub>16</sub>H<sub>14</sub>NO<sub>2</sub> [M-H]<sup>+</sup>: 252, Found: 252

**FTIR** (neat): 3377, 2918, 2358, 1701, 1619, 1490, 1432, 1343, 1192, 1129, 1014, 804 cm<sup>-1</sup>

**Mp:** 130.5-131.1 °C

**TLC** (SiO<sub>2</sub>): R<sub>f</sub> = 0.1 (ethyl acetate: hexanes, 1:4)

<sup>3</sup>M. Retini, G. Bergonzinia and P. Melchiorre, *Chem. Commun.*, 2012, **48**, 3336

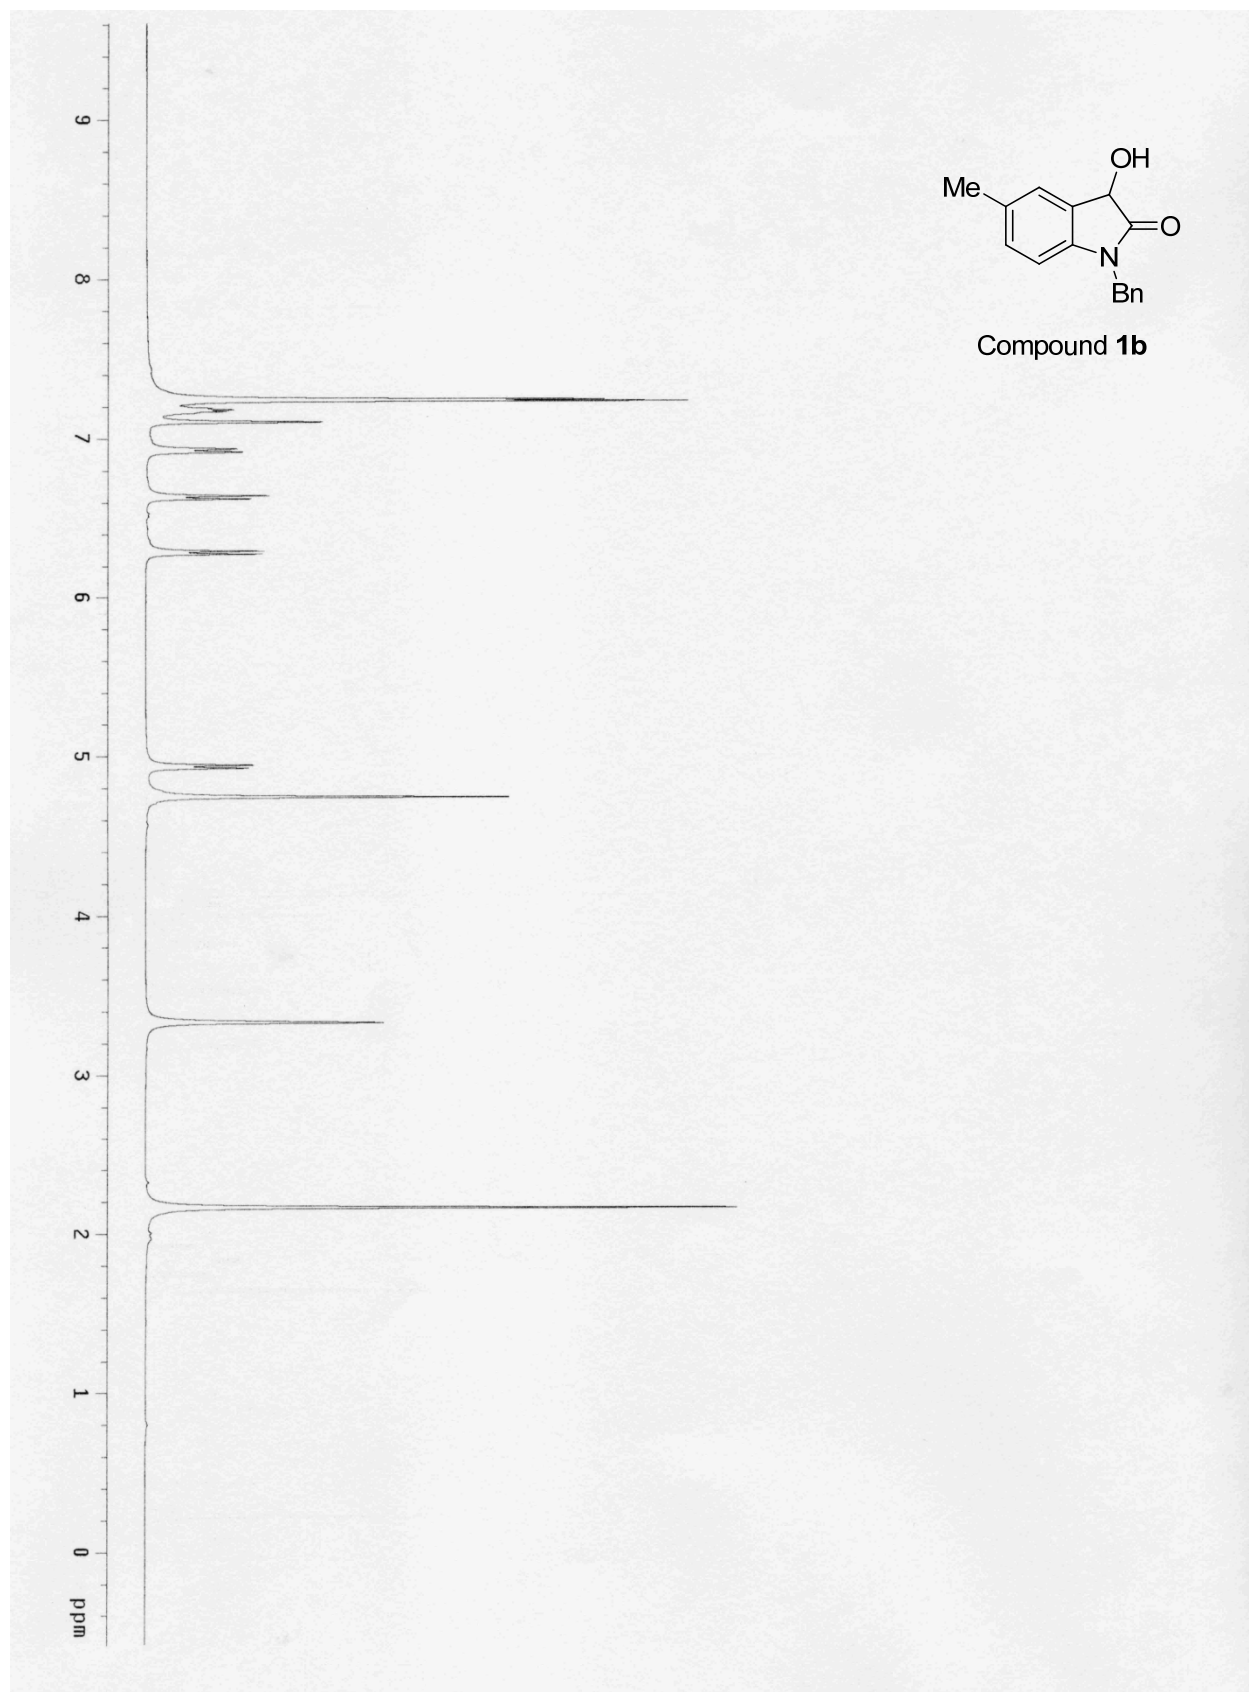

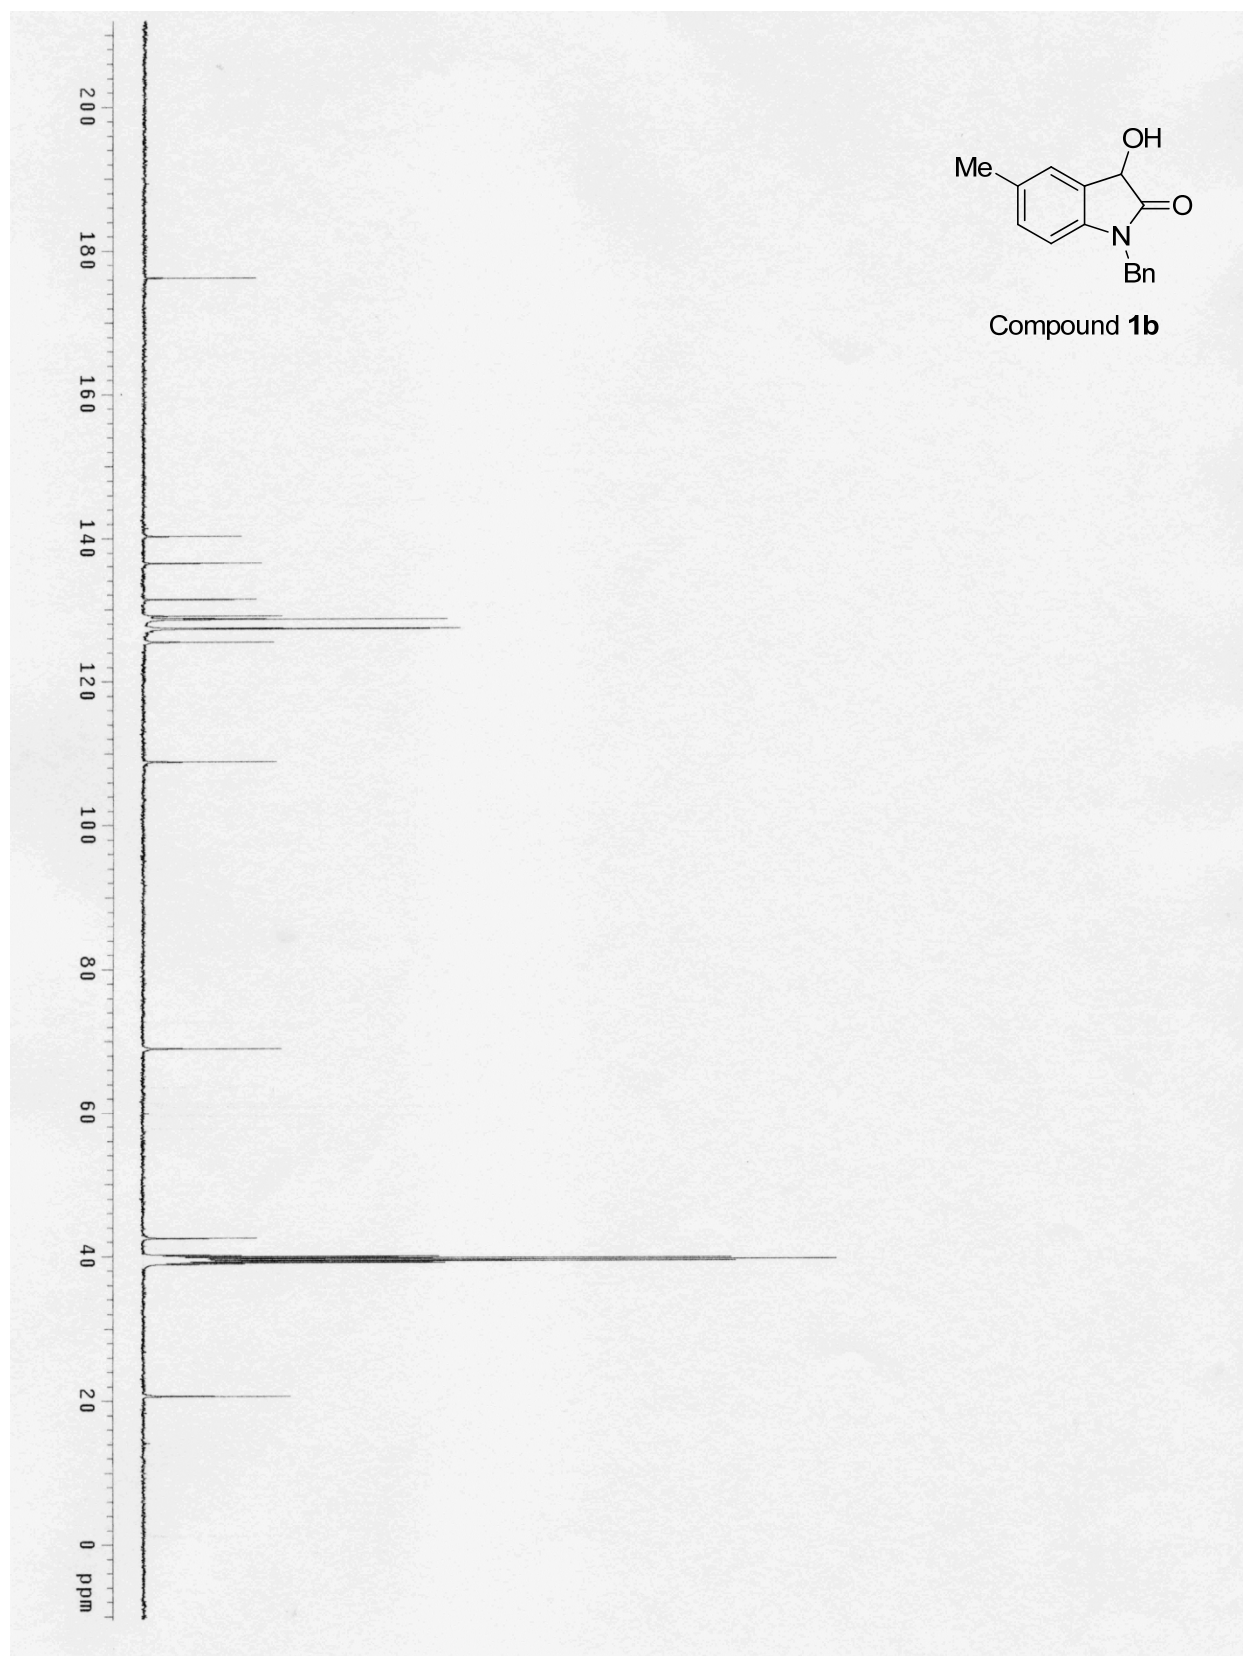



### 1-benzyl-3-hydroxy-5-methoxyindolin-2-one (**1c**)

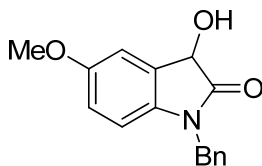

**Compound 1c:** NaBH<sub>4</sub> (1.9 mmol, 72.2 mg, 0.5 equiv) was added in small portions to a stirred suspension of commercially available 1-benzyl-3-hydroxy-5-methoxyindolin-2-one (1.0 g, 3.7 mmol, 1.0 equiv) in 21.8 mL of a 1:1 dichloromethane/ethanol mixture at -30 °C. The mixture was vigorously stirred at this temperature until the suspension became colorless. Then distilled water was added and the reaction mixture was stirred until bubbling stop. The mixture was extracted with dichloromethane (3 x 10 mL). The combined organic extracts were dried (MgSO<sub>4</sub>) and the solvent evaporated under reduced pressure. The residue was purified by chromatography on silica gel using a 4:1 mixture of dichloromethane /diethyl ether as elution solvent to give 0.4 g (40%) **1c** as a white solid.

**<sup>1</sup>H NMR** (400 MHz, D<sub>6</sub>-DMSO): δ 7.34-7.29 (m, 4H), 7.26-7.23 (m, 1H), 6.97 (d, *J* = 2.0 Hz, 1H), 6.78-6.71 (m, 2H), 6.37 (d, *J* = 8.0 Hz, 1H), 5.01 (d, *J* = 7.6 Hz, 1H), 4.81 (s, 2H), 3.69 (s, 3H)

**<sup>13</sup>C NMR** (100 MHz, D<sub>6</sub>-DMSO): δ 175.9, 155.5, 136.4, 135.9, 129.9, 128.6, 127.3, 127.2, 113.4, 111.7, 109.5, 69.1, 55.5, 42.5

**LRMS** (CI) Calcd. For C<sub>16</sub>H<sub>16</sub>NO<sub>3</sub> [M+H]<sup>+</sup>: 270, Found: 270

**FTIR** (neat): 3434, 2249, 2123, 1711, 1054, 1043, 1006, 821, 758 cm<sup>-1</sup>

**Mp:** 122.7-123.1 °C

**TLC** (SiO<sub>2</sub>): R<sub>f</sub> = 0.1 (ethyl acetate: hexanes, 1:4)

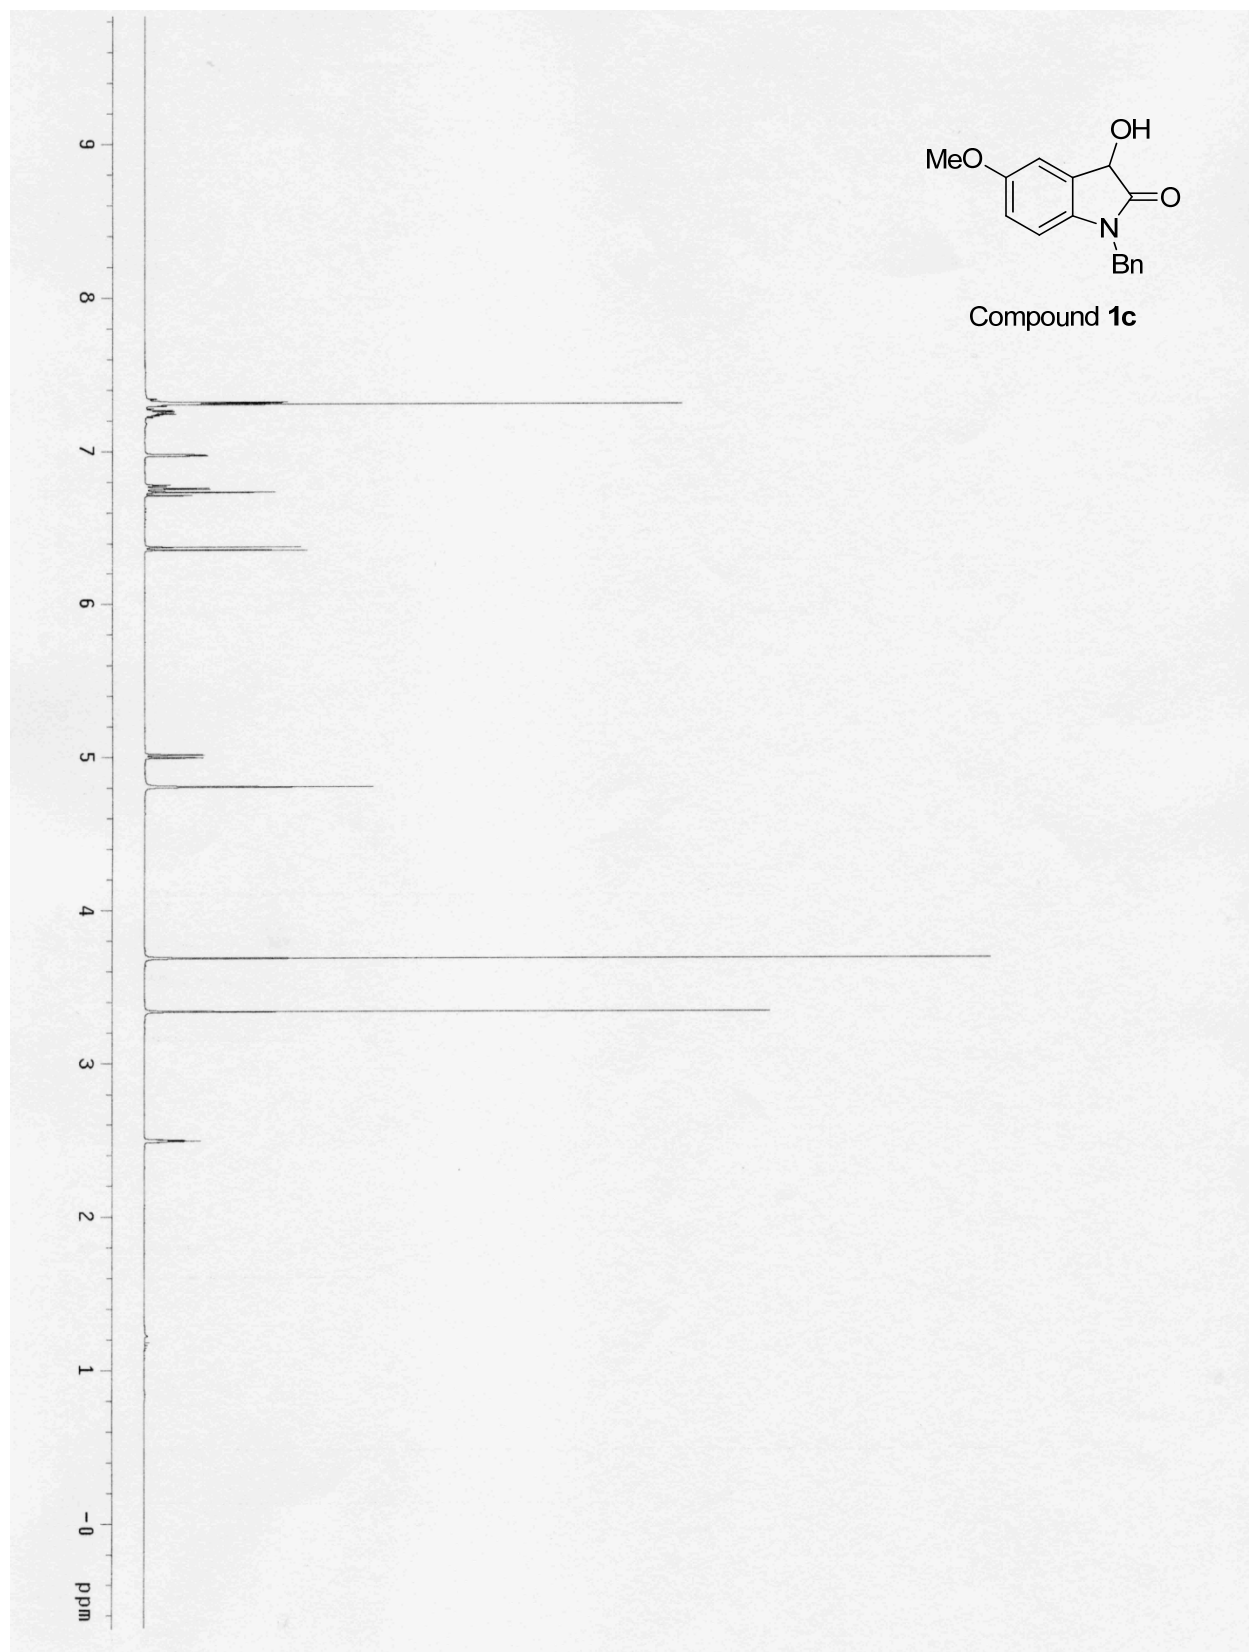

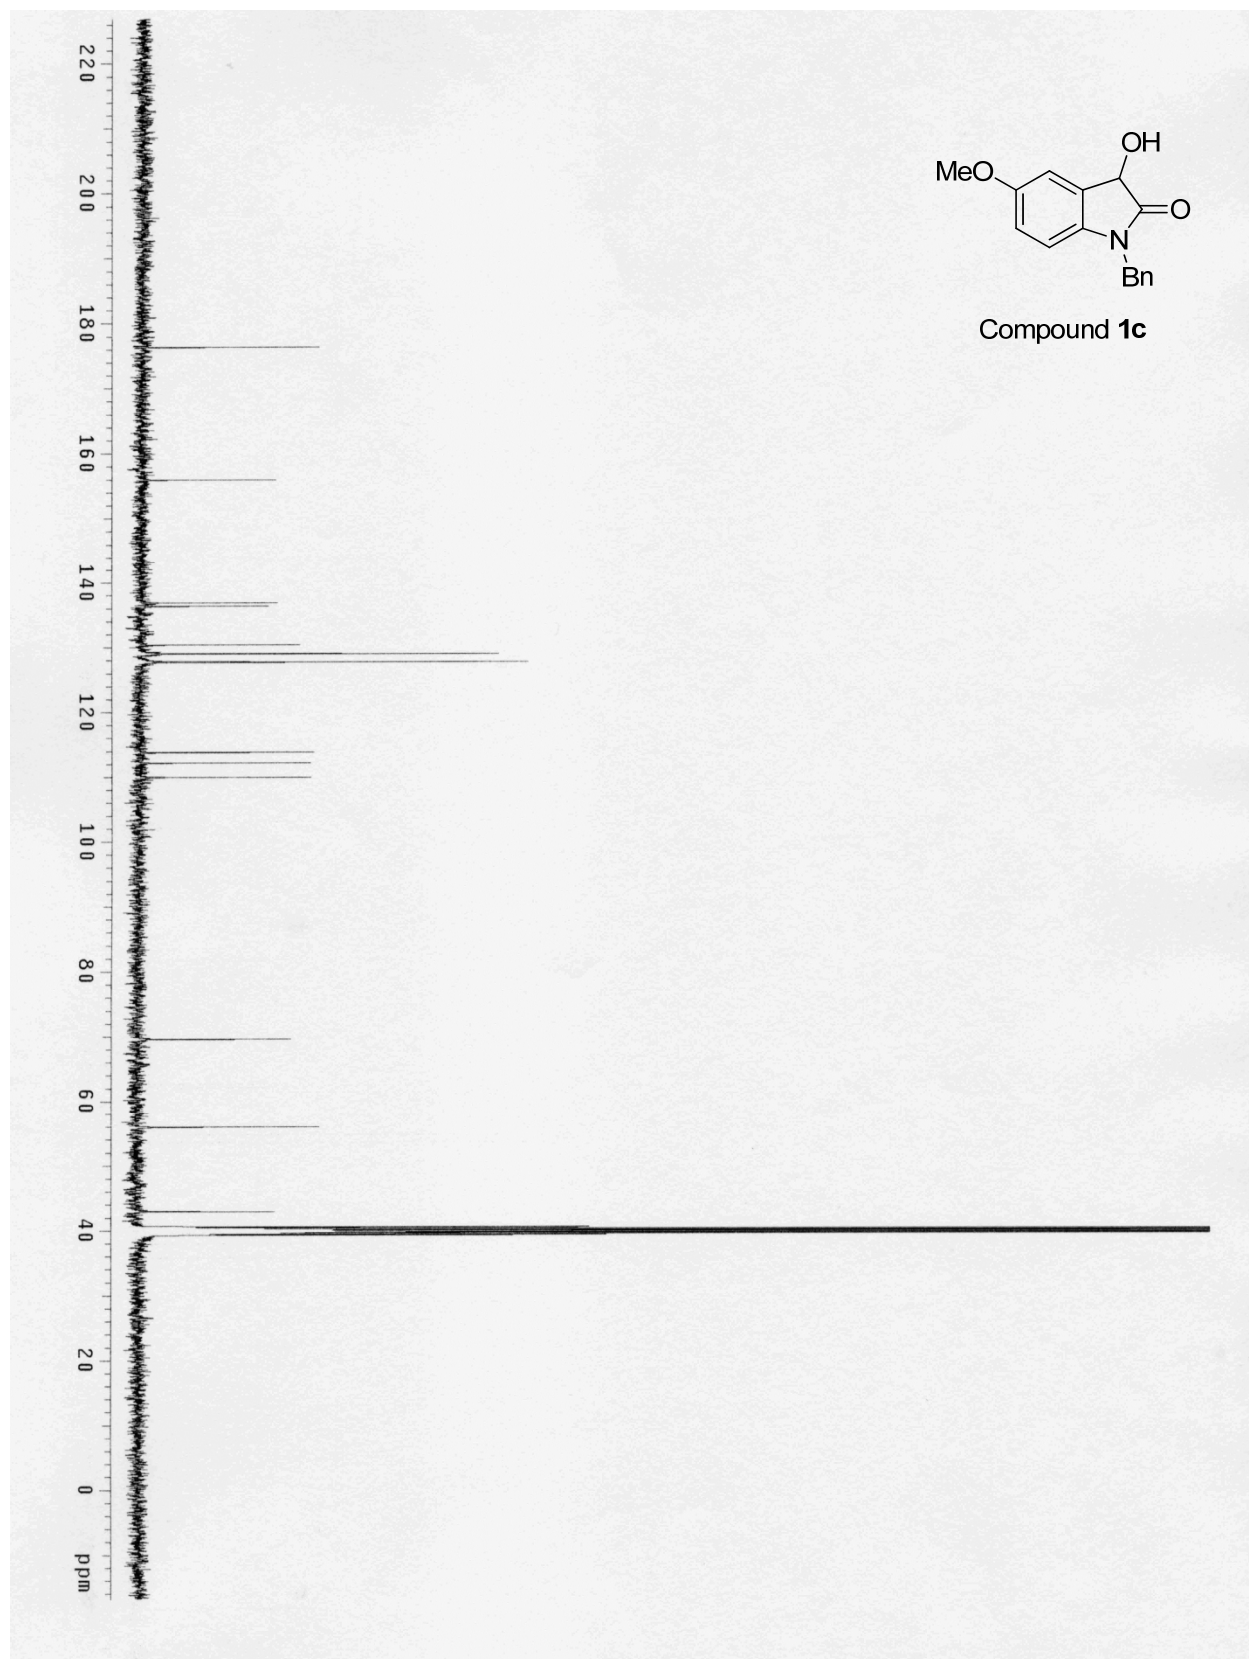

### 1-benzyl-6-chloro-3-hydroxyindolin-2-one (**1d**)

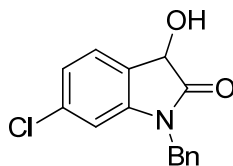

**Compound 1d:** NaBH<sub>4</sub> (2.4 mmol, 91.2 mg, 0.5 eq) was added in small portions to a stirred suspension of commercially available 1-benzyl-6-chloro-3-hydroxyindolin-2-one (1.3 g, 4.8 mmol, 1.0 equiv) in 28.2 mL of a 1:1 dichloromethane/ethanol mixture at -30 °C. The mixture was vigorously stirred at this temperature until the suspension became colorless. Then distilled water was added and the reaction mixture was stirred until bubbling stop. The mixture was extracted with dichloromethane (3 x 10 mL). The combined organic extracts were dried (MgSO<sub>4</sub>) and the solvent evaporated under reduced pressure. The residue was purified by chromatography on silica gel using a 4:1 mixture of dichloromethane /diethyl ether as elution solvent to give 0.5 g (38%) **1d** as a pale yellow solid.

**<sup>1</sup>H NMR** (400 MHz, D<sub>6</sub>-DMSO): δ 7.36-7.31 (m, 5H), 7.28-7.25 (m, 1H), 7.06 (dd, *J* = 8.0, 1.6 Hz, 1H), 6.96 (d, *J* = 2.0 Hz, 1H), 6.43 (d, *J* = 7.6 Hz, 1H), 5.04 (dd, *J* = 8.0, 1.2 Hz, 1H), 4.86 (s, 2H)

**<sup>13</sup>C NMR** (100 MHz, D<sub>6</sub>-DMSO): δ 176.3, 144.2, 135.9, 133.3, 128.6, 127.6, 127.5, 127.3, 126.0, 121.9, 109.3, 68.3, 42.4

**LRMS** (CI) Calcd. For C<sub>15</sub>H<sub>13</sub>ClNO<sub>2</sub> [M+H]<sup>+</sup>: 274, Found: 274

**FTIR** (neat): 3451, 2249, 2124, 1725, 1613, 1489, 1433, 1372, 1174, 1065, 1037, 1026, 821, 758 cm<sup>-1</sup>

**Mp:** 136.5-137.2 °C

**TLC** (SiO<sub>2</sub>): R<sub>f</sub> = 0.1 (ethyl acetate: hexanes, 1:4)

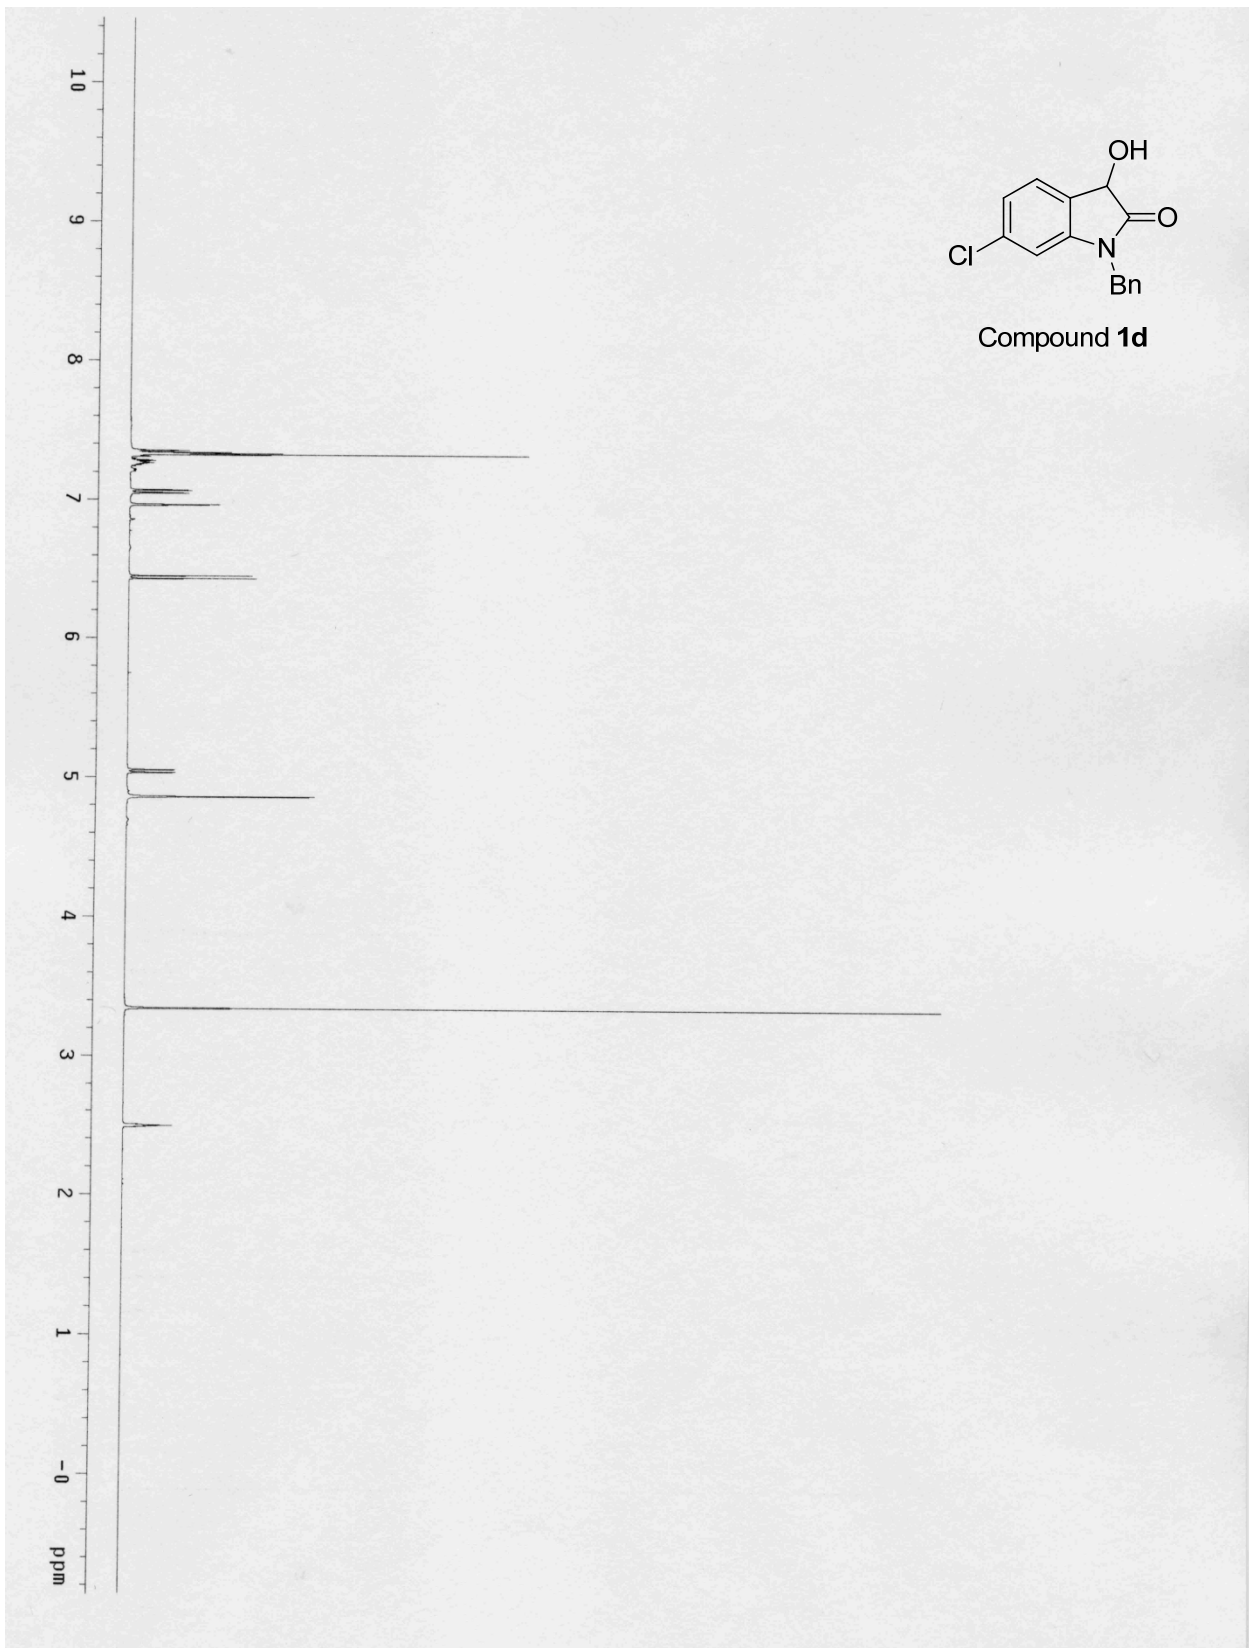

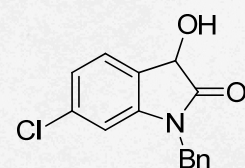

Compound 1d

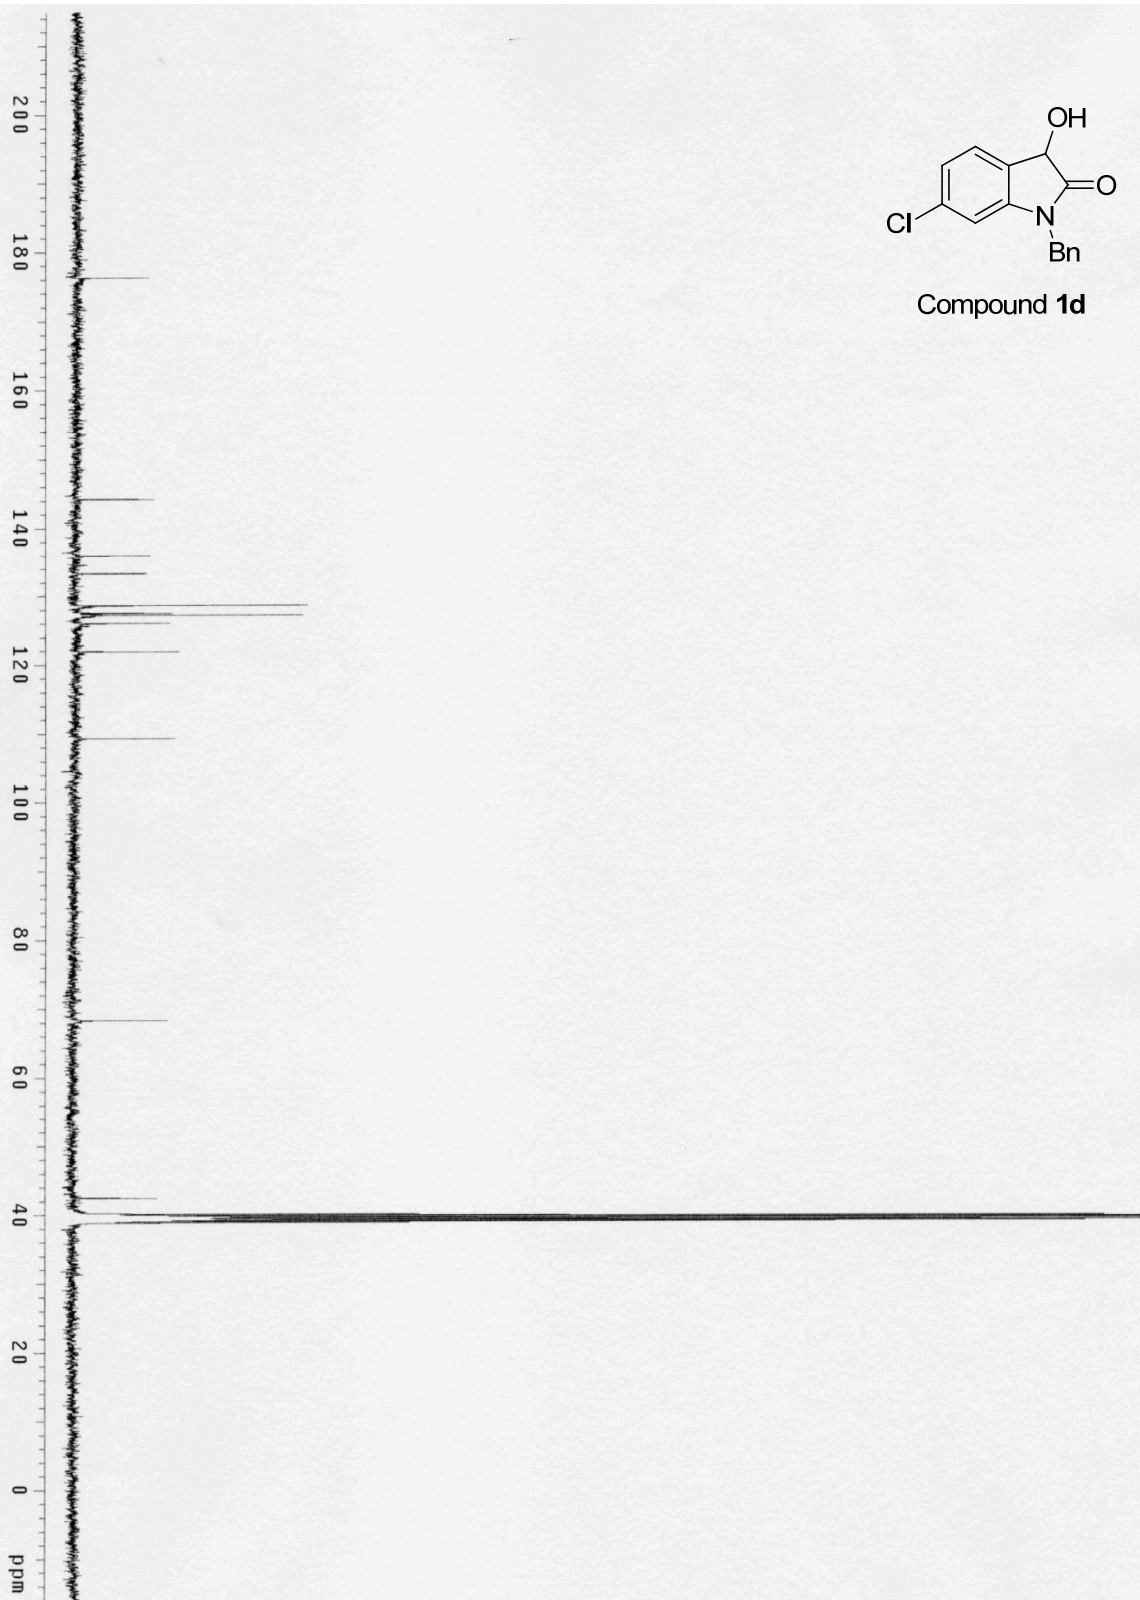

**1-benzyl-7-fluoro-3-hydroxyindolin-2-one (1e)**

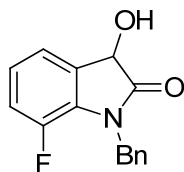

**Compound 1e:** NaBH<sub>4</sub> (4.35 mmol, 165.3 mg, 0.5 eq) was added in small portions to a stirred suspension of commercially available 1-benzyl-7-fluoro-3-hydroxyindolin-2-one (2.22 g, 8.7 mmol, 1.0 equiv) in 51.2 mL of a 1:1 dichloromethane/ethanol mixture at -30 °C. The mixture was vigorously stirred at this temperature until the suspension became colorless. Then distilled water was added and the reaction mixture was stirred until bubbling stop. The mixture was extracted with dichloromethane (3 x 20 mL). The combined organic extracts were dried (MgSO<sub>4</sub>) and the solvent evaporated under reduced pressure. The residue was purified by chromatography on silica gel using a 4:1 mixture of dichloromethane /diethyl ether as elution solvent to give 1.2 g (54%) **1e** as a white solid.

**<sup>1</sup>H NMR** (400 MHz, D<sub>6</sub>-DMSO): δ 7.34-7.30 (m, 2H), 7.26-7.18 (m, 4H), 7.13-7.00 (m, 2H), 6.51 (d, *J* = 8.0 Hz, 1H), 5.12 (d, *J* = 7.6 Hz, 1H), 4.92 (dd, *J* = 24.8, 16.0 Hz, 2H)

**<sup>13</sup>C NMR** (100 MHz, D<sub>6</sub>-DMSO): δ 176.1, 146.5 (d, *J* = 241.1 Hz), 137.1, 131.9, 128.9, 128.5, 127.3, 126.6, 123.4 (d, *J* = 6.7 Hz), 120.9, 117.0 (d, *J* = 19.4), 68.8, 44.3

**<sup>19</sup>F NMR** (376 MHz, D<sub>6</sub>-DMSO): δ -135.0– -135.1 (m)

**LRMS** (CI) Calcd. For C<sub>15</sub>H<sub>12</sub>FNO<sub>2</sub> [M]<sup>+</sup>: 257, Found: 257

**FTIR** (neat): 3341, 2349, 1734, 1628, 1481, 1343, 1245, 1192, 1107, 814, 707 cm<sup>-1</sup>

**Mp**: 113.2-113.7 °C

**TLC** (SiO<sub>2</sub>): R<sub>f</sub> = 0.1 (ethyl acetate: hexanes, 1:4)

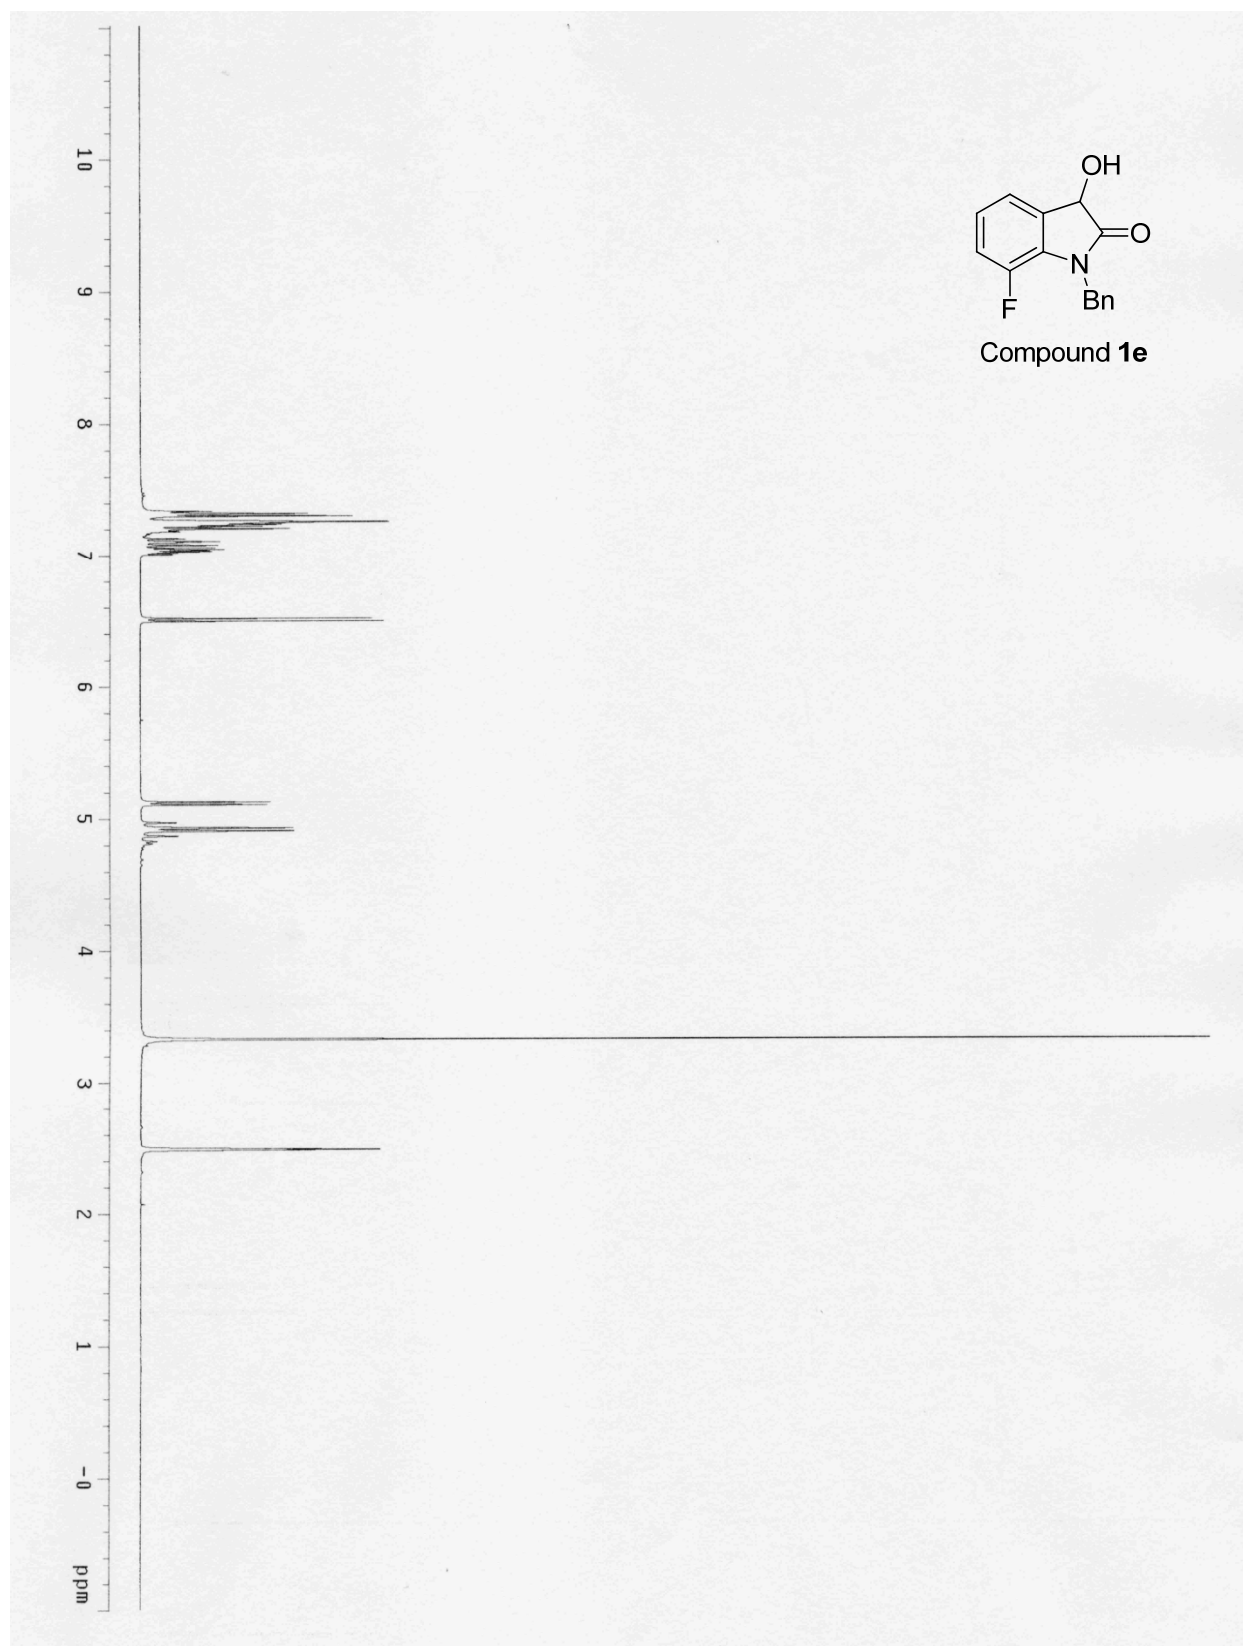



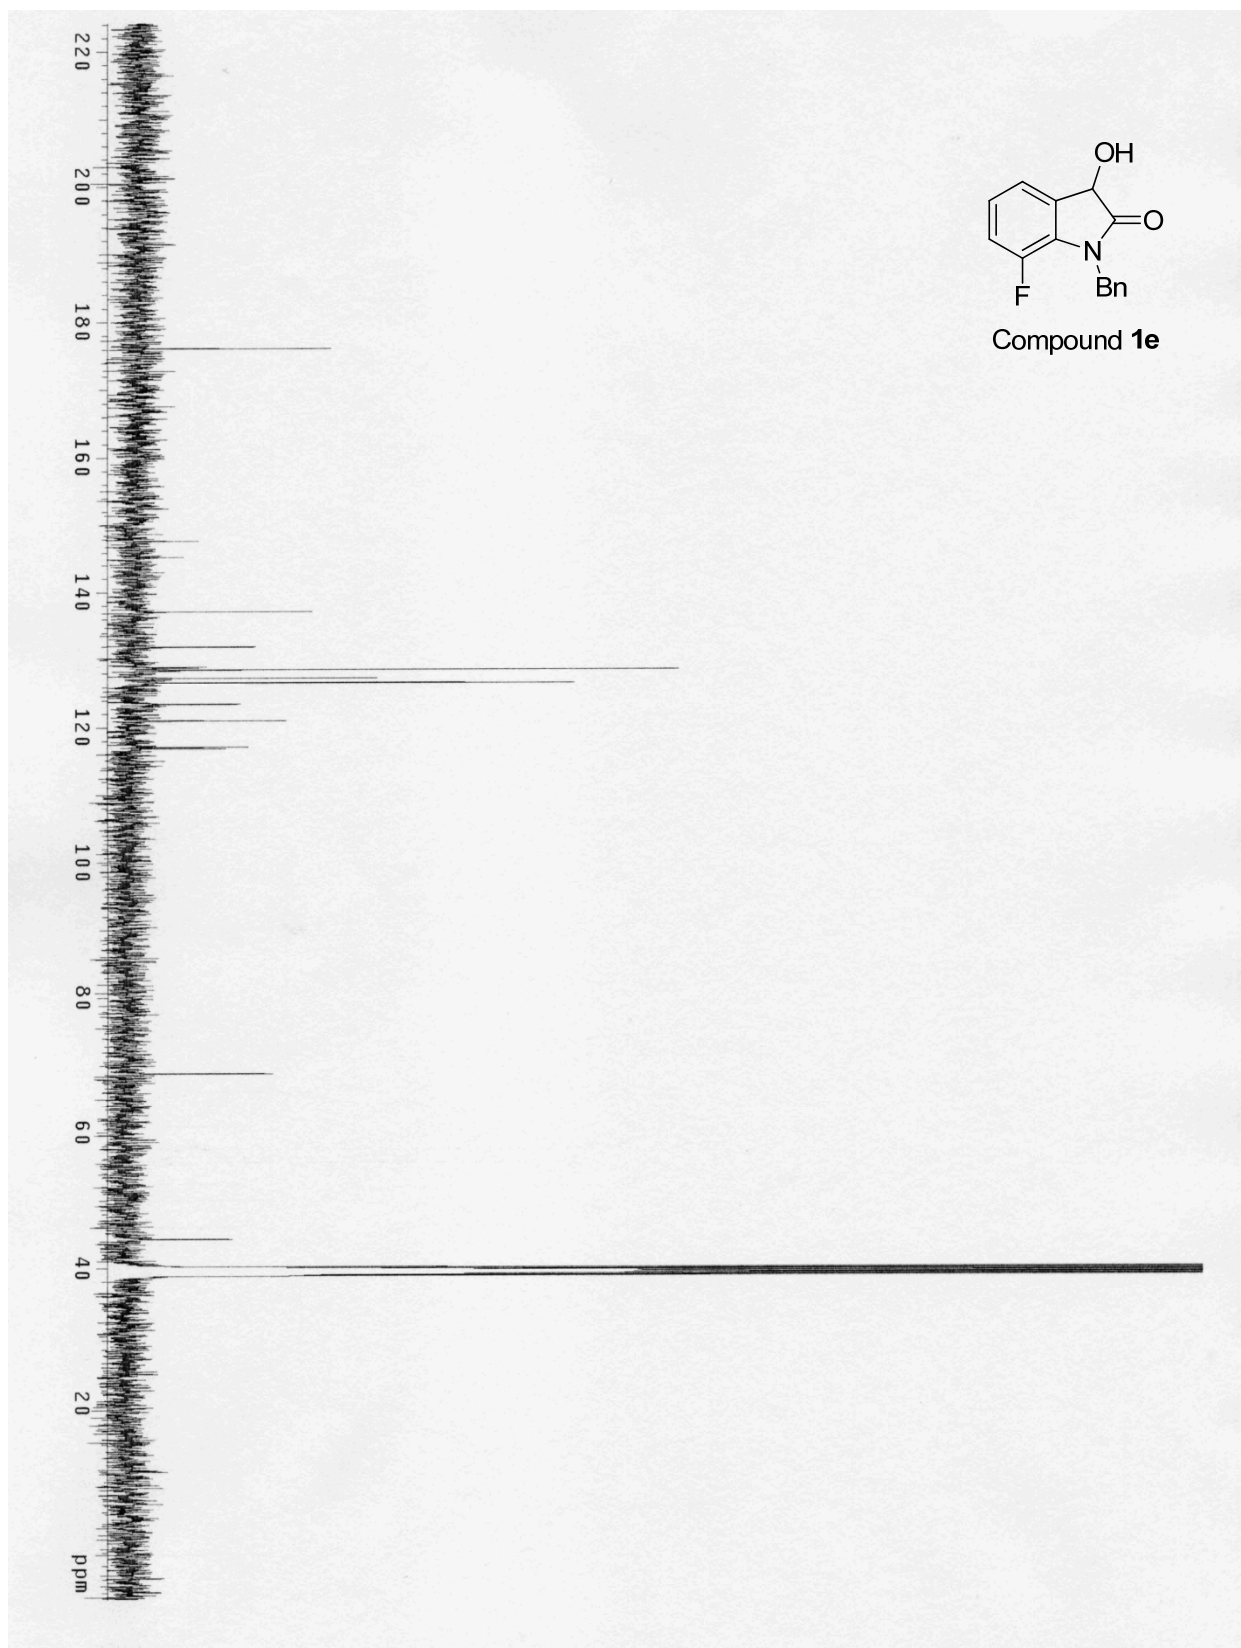

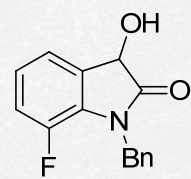

Compound **1e**

20  
0  
-20  
-40  
-60  
-80  
-100  
-120  
-140  
-160  
-180  
-200  
-220  
ppm

**Experimental Procedures and Spectroscopic Data for Preparation of 1-Benzyl-3-hydroxy-7,7-dimethyl-3,7-dihydropyrano[2,3-g]indol-2(1H)-one (1f)**

**7,7-dimethylpyrano[2,3-g]indole-2,3(1H,7H)-dione (1f-I)**

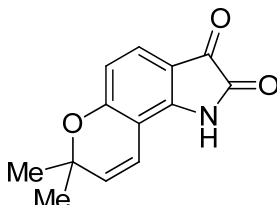

**Compound 1f-I:** Oxalyl chloride (16.7 mL, 194.92 mmol, 10.0 equiv) and DCM (78 mL) were added to a 3-necked 500 mL RBF and the solution was cooled to 0 °C with an ice bath. A solution of 2,2-dimethyl-2H-chromen-5-amine<sup>4</sup> (3.42 g, 19.49 mmol, 1.0 equiv) in DCM (78 mL) was added via syringe over 5-10 min. The ice bath was removed upon completion of addition and the brown solution was stirred at room temperature for 1 h. AlCl<sub>3</sub> (2.73 g, 20.47 mmol, 1.05 equiv) was added in one portion and the reaction mixture was stirred at room temperature for 3 hours. The crude reaction mixture was transferred to an Erlenmeyer flask containing ice and was stirred until the ice was melted. The mixture was extracted with DCM (3 x 100 mL). The combined organic layers were dried over MgSO<sub>4</sub>, then filtered and concentrated under reduced pressure to a red-orange solid. Purification on flash column chromatography (2.5-5% EtOAc/DCM) gave the desired isatin **1f-I** (1.25 g) in 36% isolated yield.

**<sup>1</sup>H NMR** (400 MHz, CDCl<sub>3</sub>): δ 9.60 (s, 1H), 7.44 (dd, *J* = 8.4, 0.6 Hz, 1H), 6.46 (dd, *J* = 8.4, 0.8 Hz, 1H), 6.40 (dd, *J* = 10.0, 0.6 Hz, 1H), 5.78 (d, *J* = 10.0 Hz, 1H), 1.50 (s, 6H)

**<sup>13</sup>C NMR** (100 MHz, CDCl<sub>3</sub>): δ 180.3, 162.4, 146.1, 131.4, 127.8, 114.4, 112.1, 111.3, 106.1, 78.9, 77.2, 28.5

**LRMS** (CI) Calcd. For C<sub>13</sub>H<sub>12</sub>NO<sub>3</sub> [M+H]<sup>+</sup>: 230, Found: 230

**FTIR** (neat): 3159, 2358, 1735, 1729, 1637, 1588, 1432, 1339, 1112, 1059, 729 cm<sup>-1</sup>

**Mp:** 240.6-241.1 °C

**TLC** (SiO<sub>2</sub>): R<sub>f</sub> = 0.1 (ethyl acetate: hexanes, 1:4)

<sup>4</sup>P. E. Brown and R. A. Lewis, *J. CHEM. SOC. PERKIN TRANS.* 1, 1992, **5**, 573

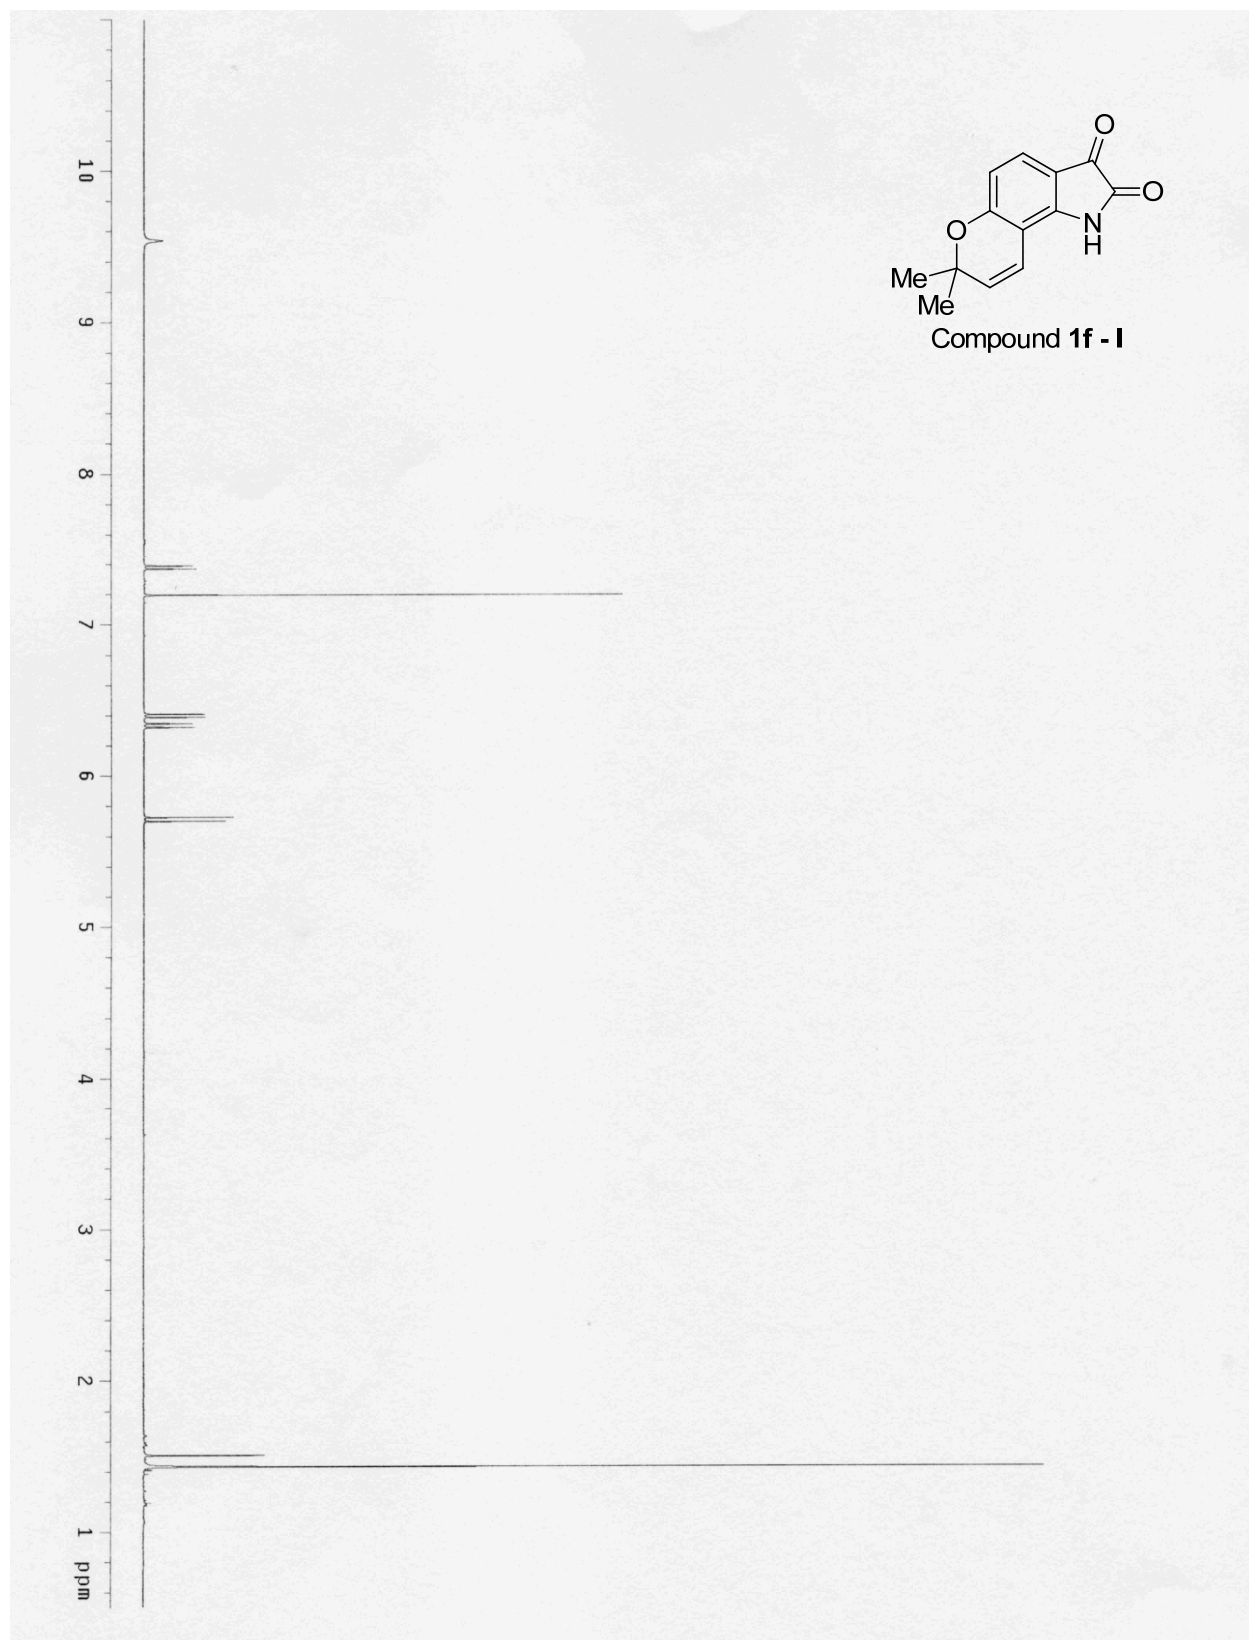

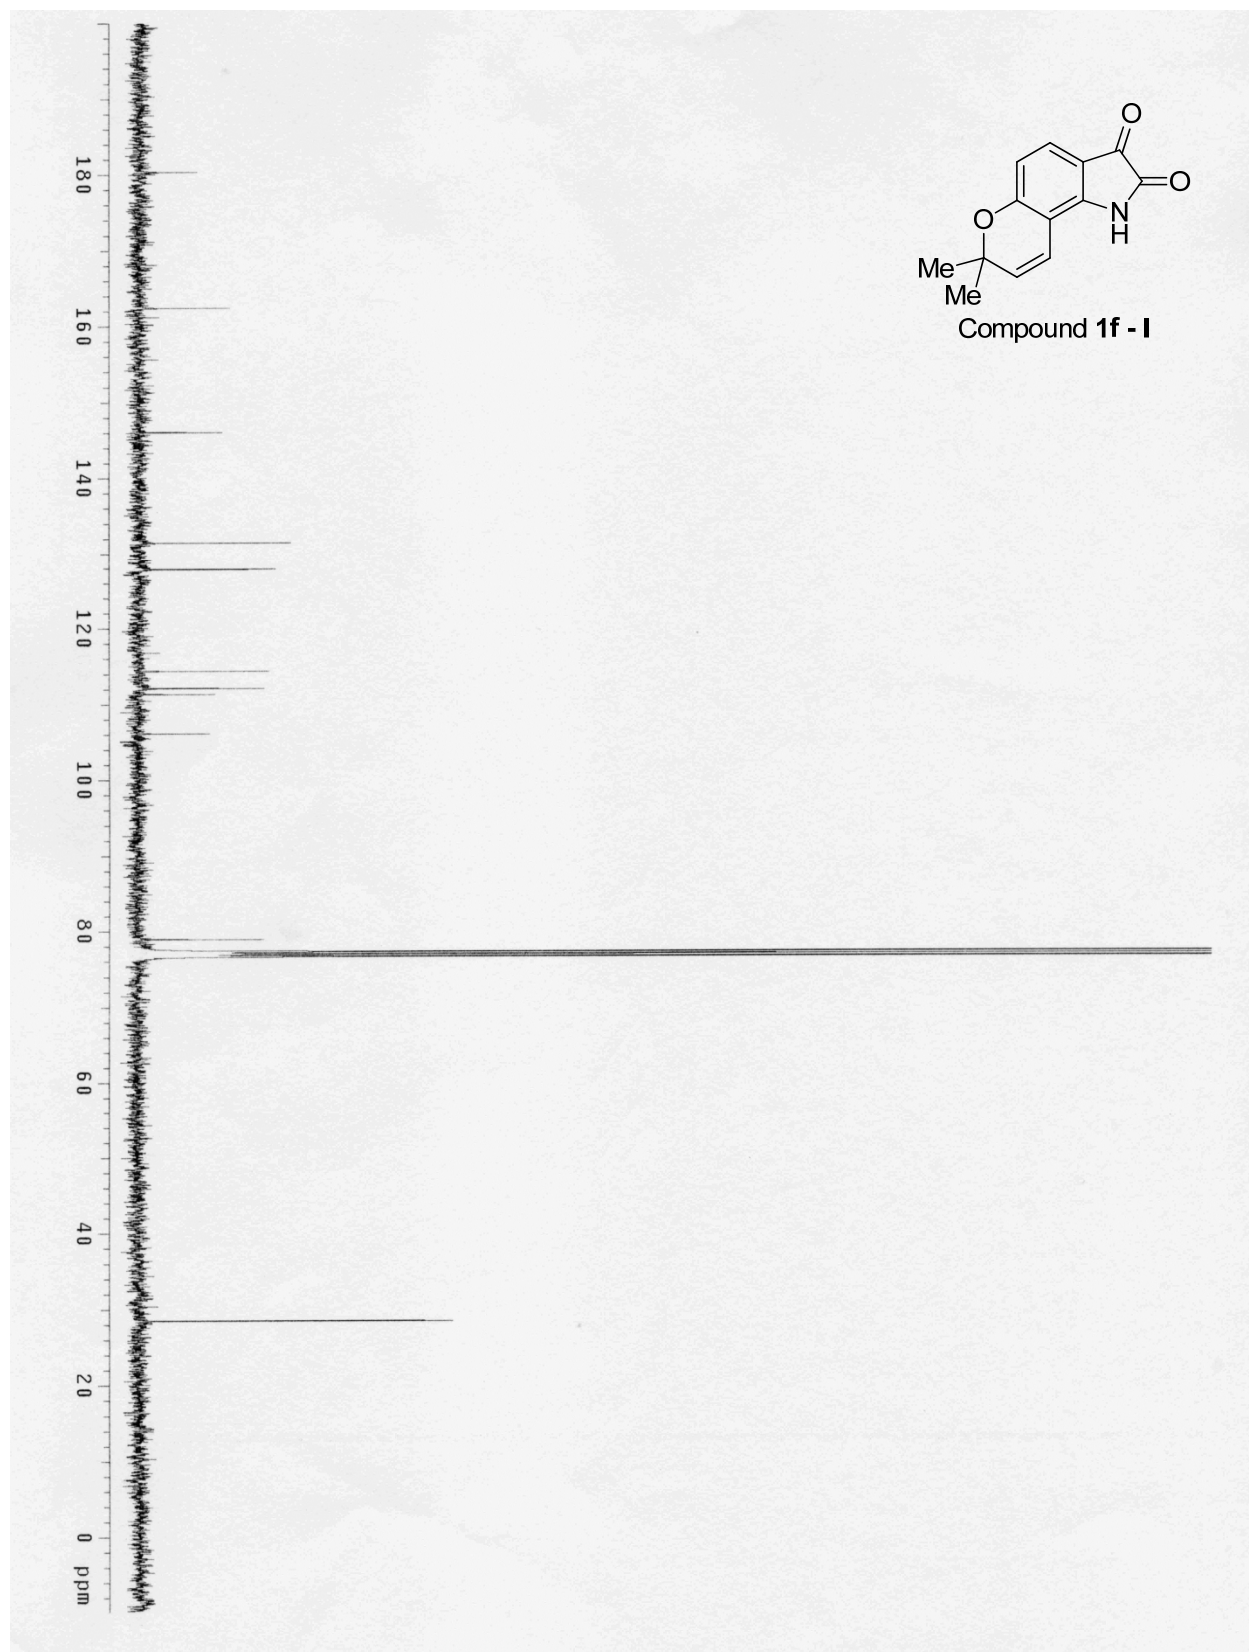

**1-benzyl-7,7-dimethylpyrano[2,3-g]indole-2,3(1H,7H)-dione (1f-II)**

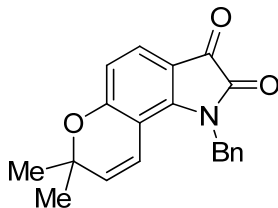

**Compound 1f-II:** A solution of 1.61 g of isatin **1f-I** (6.9 mmol, 1.0 equiv) in 20.9 mL of dry DMF was slowly added to a suspension of NaH (331 mg, 13.8 mmol, 2.0 equiv, 60 % in mineral oil) in 20.9 mL of dry DMF at 0 °C. The suspension was stirred for 2 hours at 0 °C. Then, benzyl bromide (1.5 equiv) was added. The mixture was stirred for 2 hours at room temperature and water was added until precipitation of the N-protected isatin **1f-II**. Crystallization from hexane/ethyl acetate afforded the pure product in 70% yield.

**<sup>1</sup>H NMR** (400 MHz, CDCl<sub>3</sub>): δ 7.52 (d, *J* = 8.0 Hz, 1H), 7.37-7.21 (m, 5H), 6.51 (d, *J* = 8.0 Hz, 1H), 6.32 (d, *J* = 10.0 Hz, 1H), 5.57 (d, *J* = 10.4 Hz, 1H), 5.13 (s, 2H), 1.38 (s, 6H)

**<sup>13</sup>C NMR** (100 MHz, CDCl<sub>3</sub>): δ 180.3, 163.1, 161.0, 147.5, 135.4, 131.3, 129.1, 127.8, 127.4, 125.8, 116.2, 112.5, 112.4, 107.2, 77.4, 45.9, 27.7

**LRMS** (CI) Calcd. For C<sub>20</sub>H<sub>18</sub>NO<sub>3</sub> [M+H]<sup>+</sup>: 320, Found: 320

**FTIR** (neat): 3065, 2972, 2927, 2345, 1735, 1637, 1584, 1419, 1361, 1237, 1148, 1108, 1045, 1005, 753 cm<sup>-1</sup>

**Mp:** 117.9-118.3 °C

**TLC (SiO<sub>2</sub>):** R<sub>f</sub> = 0.2 (ethyl acetate: hexanes, 1:4)

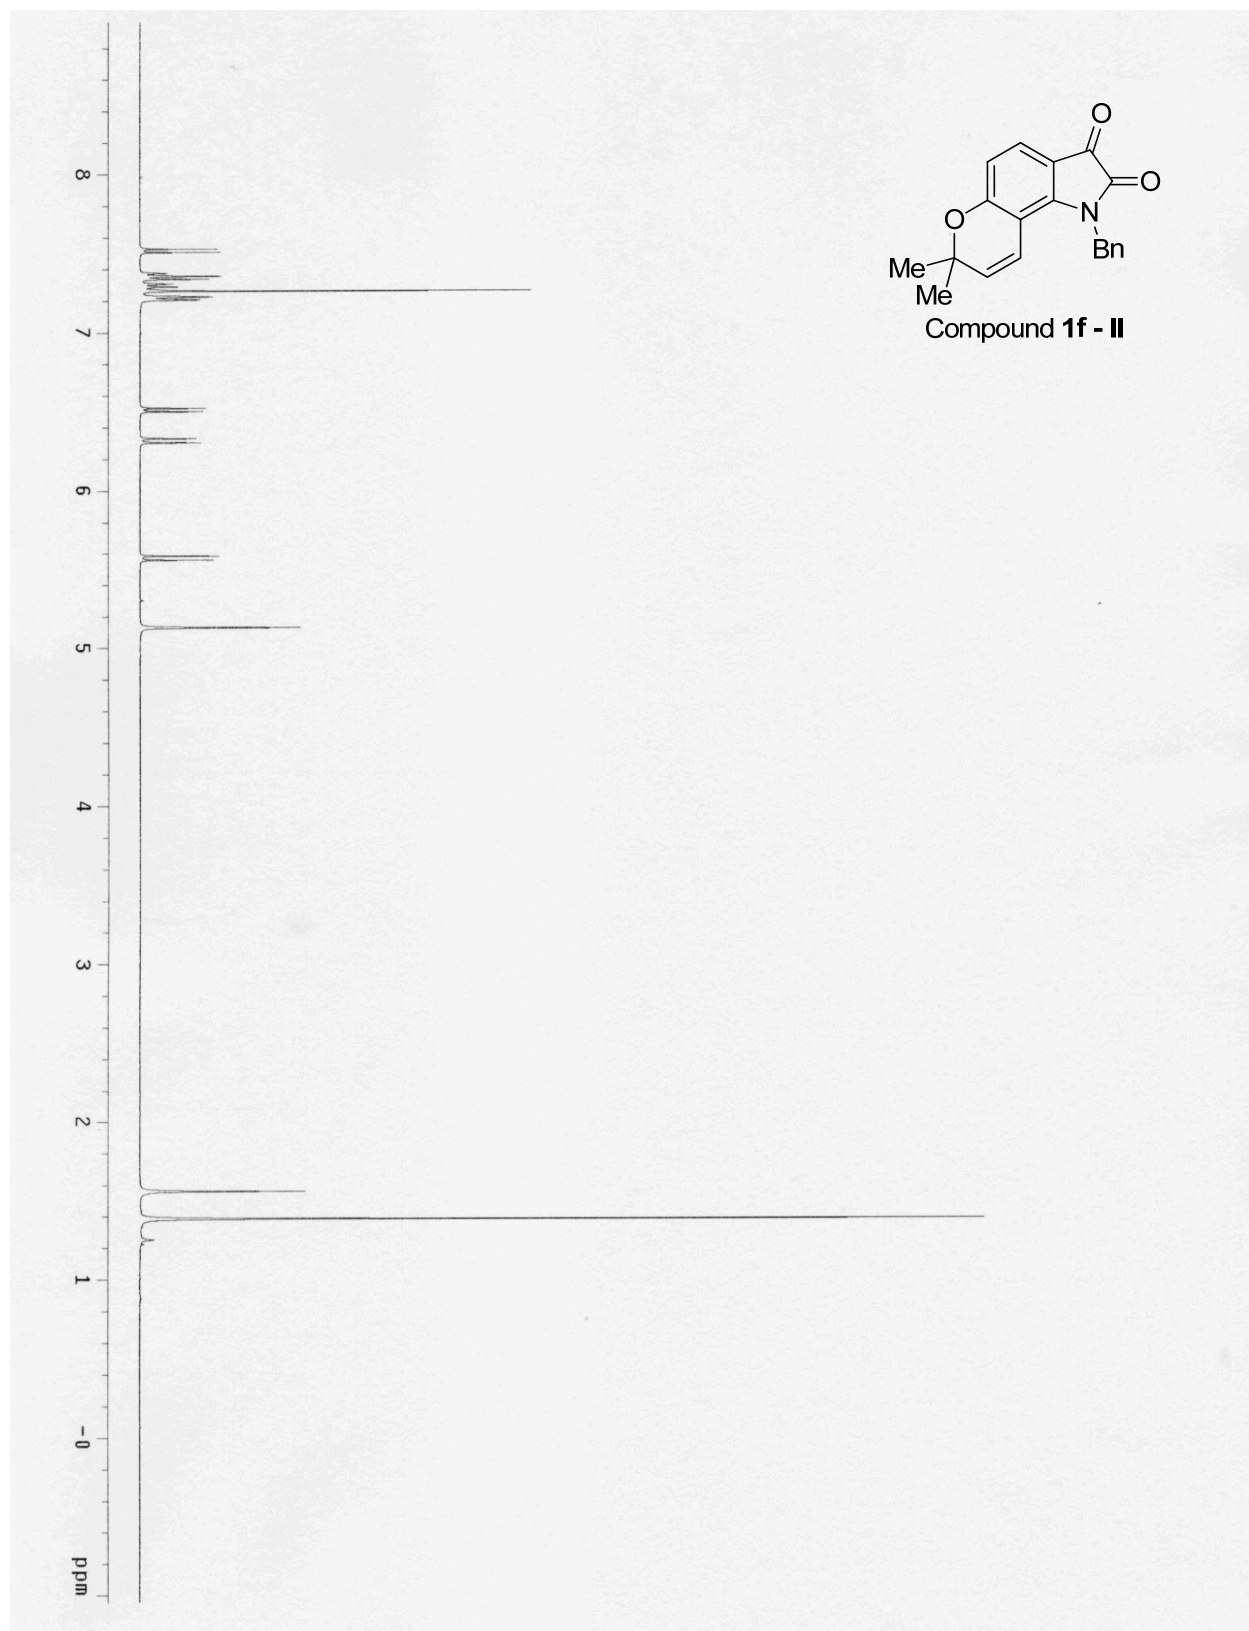

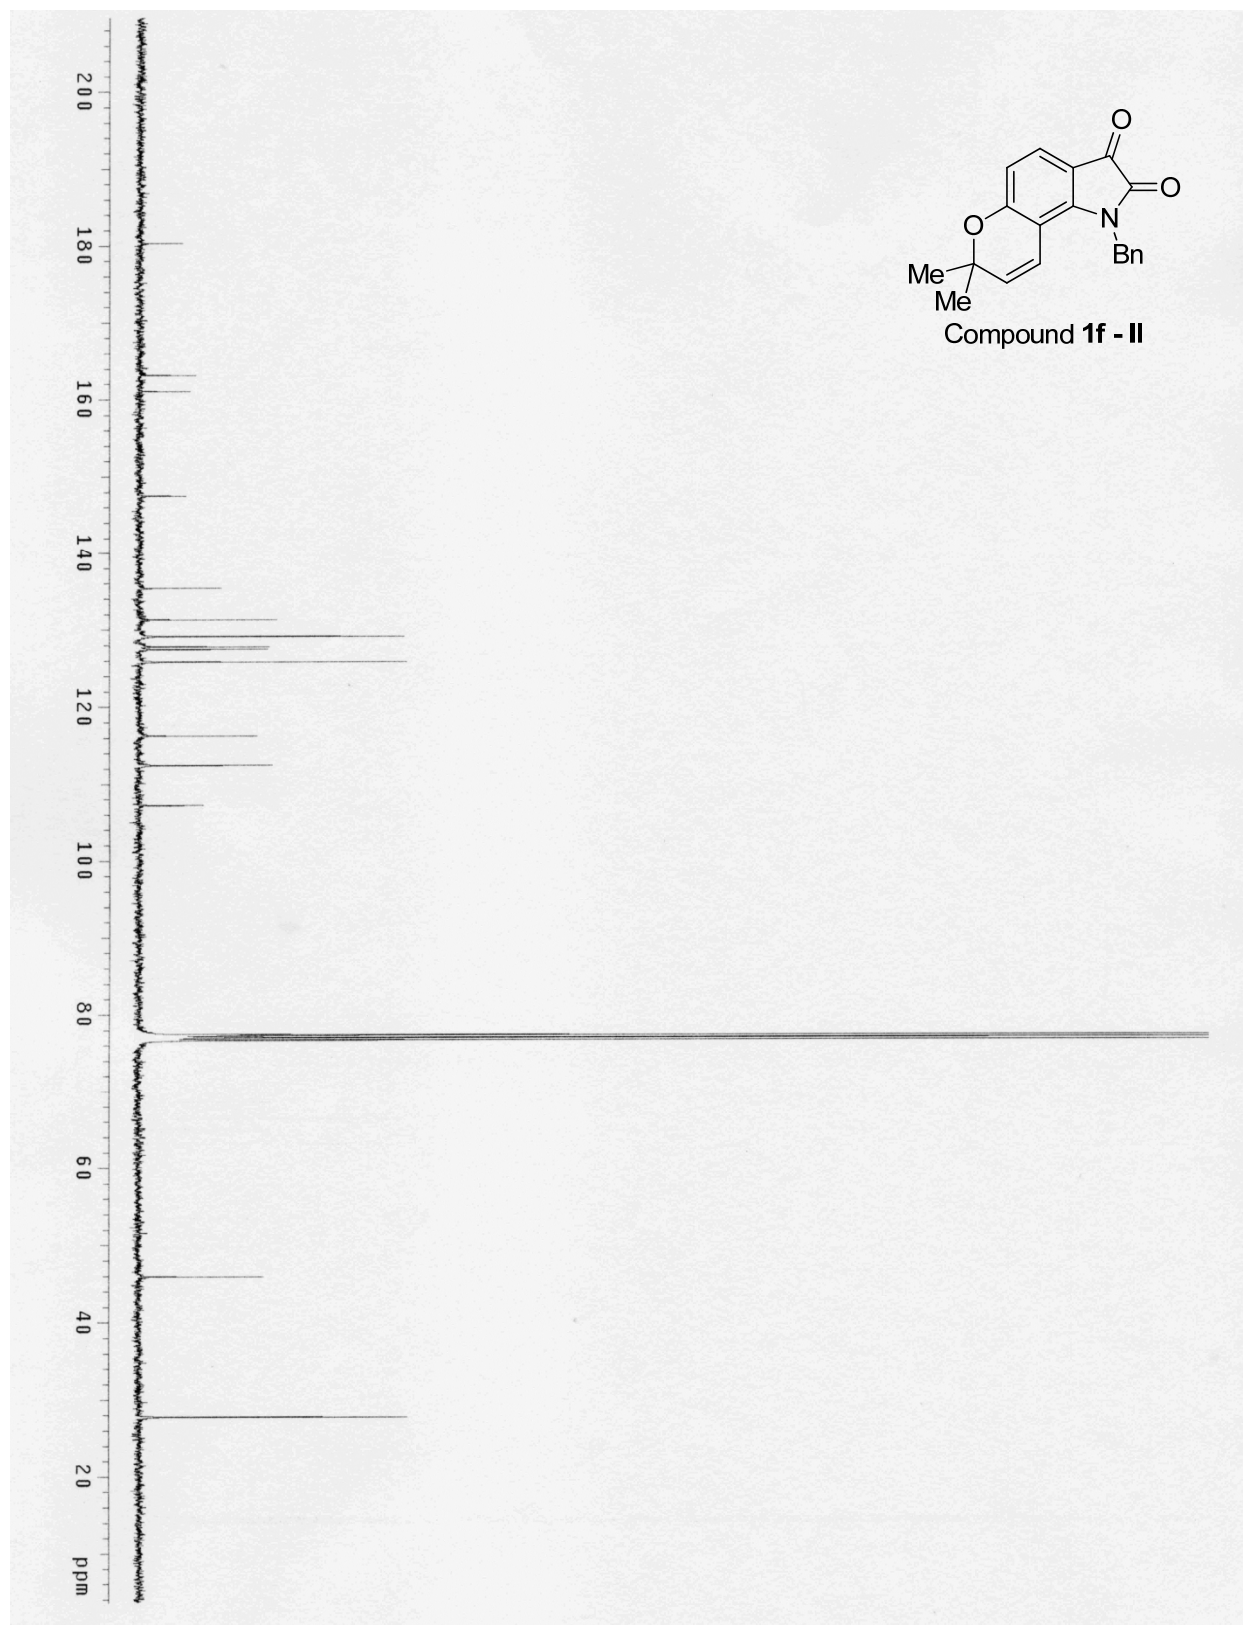



**1-benzyl-3-hydroxy-7,7-dimethyl-3,7-dihydropyrano[2,3-g]indol-2(1H)-one (1f)**

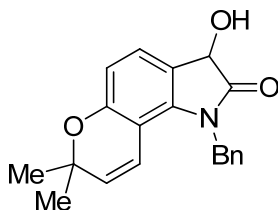

**Compound 1f:** NaBH<sub>4</sub> (2.9 mmol, 110.0 mg, 0.5 equiv) was added in small portions to a stirred suspension of **1f-II** (1.85 g, 5.8 mmol, 1.0 equiv) in 34.0 mL of a 1:1 dichloromethane/ethanol mixture at -30 °C. The mixture was vigorously stirred at this temperature until the suspension became colorless. Then distilled water was added and the reaction mixture was stirred until bubbling stop. The mixture was extracted with dichloromethane (3 x 20 mL). The combined organic extracts were dried (MgSO<sub>4</sub>) and the solvent evaporated under reduced pressure. The residue was purified by chromatography on silica gel using a 4:1 mixture of dichloromethane /diethyl ether as elution solvent to give 1.0 g (54%) **1f** as a white solid.

**<sup>1</sup>H NMR** (400 MHz, D<sub>6</sub>-DMSO): δ 7.33 (t, *J* = 7.2 Hz, 2H), 7.25 (t, *J* = 7.2 Hz, 1H), 7.19 (d, *J* = 7.2 Hz, 2H), 7.13 (dd, *J* = 7.6, 1.0 Hz, 1H), 6.47 (d, *J* = 8.0 Hz, 1H), 6.37 (d, *J* = 10.0 Hz, 1H), 6.26 (d, *J* = 8.0 Hz, 1H), 5.58 (d, *J* = 10.4 Hz, 1H), 5.03 (s, 2H), 4.98 (dd, *J* = 7.6, 1.0 Hz, 1H), 1.26 (s, 3H), 1.20 (s, 3H)

**<sup>13</sup>C NMR** (100 MHz, D<sub>6</sub>-DMSO): δ 177.8, 153.6, 138.4, 136.6, 130.9, 128.7, 127.2, 125.8, 124.9, 121.7, 116.9, 110.1, 106.4, 74.7, 67.8, 44.3, 26.9, 26.5

**LRMS** (CI) Calcd. For C<sub>20</sub>H<sub>20</sub>NO<sub>3</sub> [M+H]<sup>+</sup>: 322, Found: 322

**FTIR** (neat): 3368, 2972, 2349, 2046, 1690, 1593, 1459, 1375, 1152, 987, 720 cm<sup>-1</sup>

**Mp:** 177.3-177.5 °C

**TLC** (SiO<sub>2</sub>): R<sub>f</sub> = 0.1 (ethyl acetate: hexanes, 1:4)

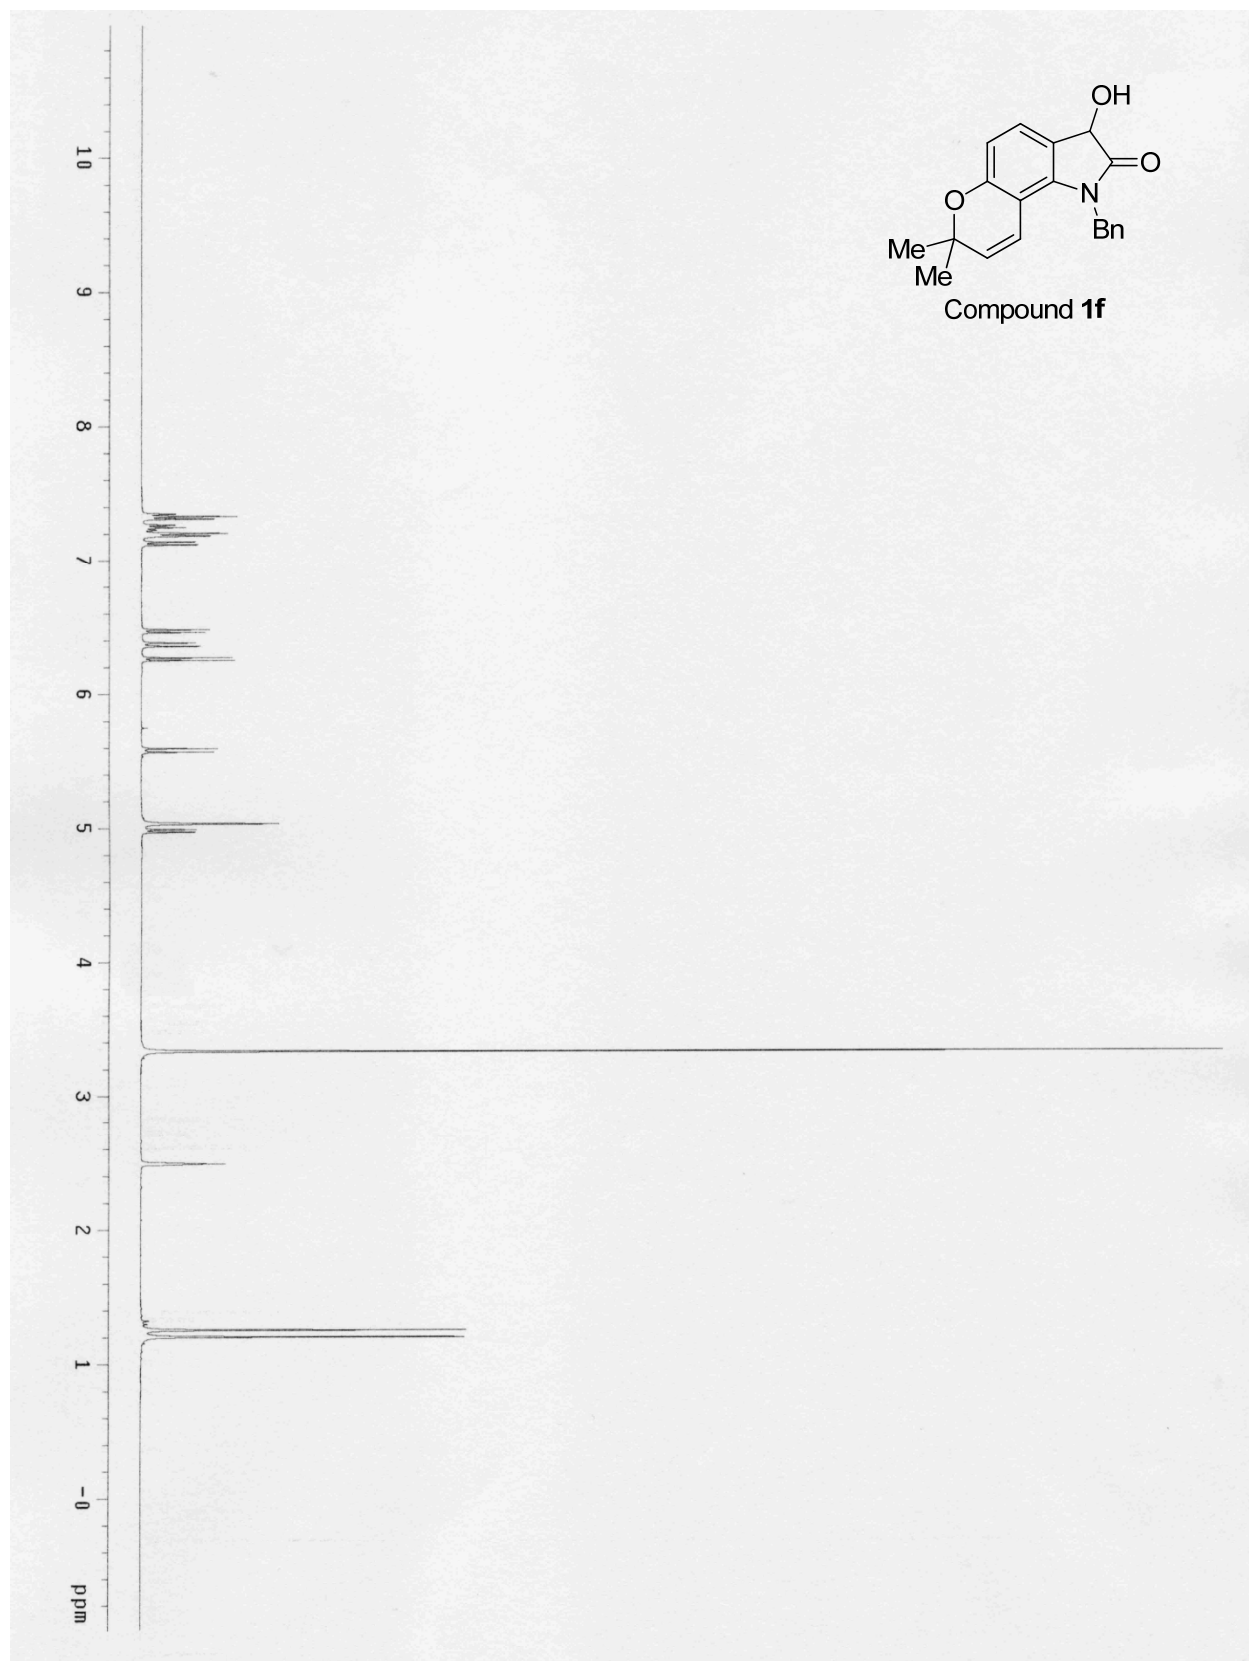

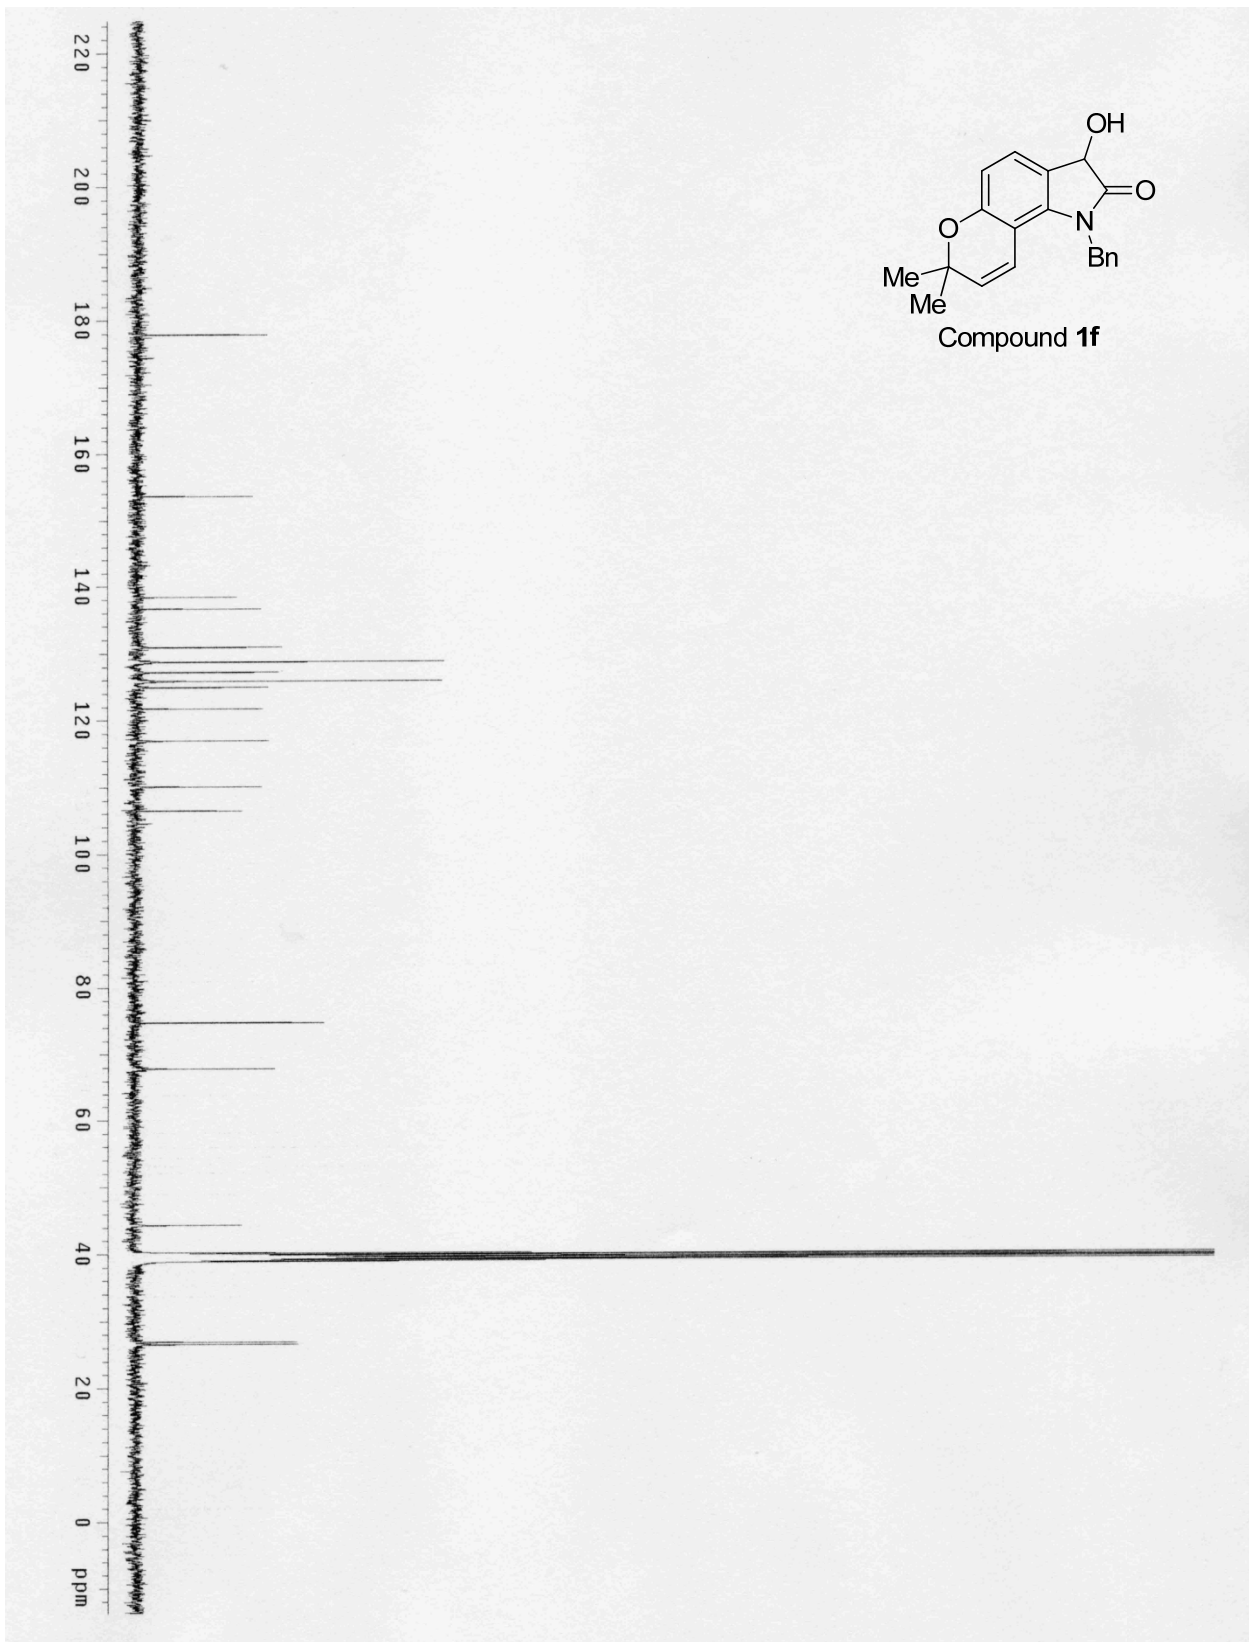

## Experimental Details and Spectroscopic Data for Diene 2f

### (5-methylenehept-6-en-1-yl)benzene

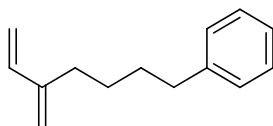

**Compound 2f:** **2f** was prepared by modifying an iron catalyzed coupling method reported by Cossy<sup>5</sup>. To a flame dried one neck round bottom flask equipped with a magnetic stir bar was added FeCl<sub>3</sub> (0.49 mg, 3.0 mmol, 20 mol%) and THF (50ml). It was cooled to 0°C followed by addition of 1-iodo-4-phenylbutane<sup>6</sup> (3.9 g, 15 mmol, 1.0 equiv.) The resulting solution was stirred at 0°C for 10 min and a solution of chloroprene Grignard (43 ml, 30 mmol, 0.7M in THF, 2.0 equiv) and TMEDA (4.3 ml, 29 mmol, 1.9 equiv) was added drop-wise over 1 hour. After 2 hours at 0°C, the reaction mixture was quenched by adding an aqueous saturated NH<sub>4</sub>Cl solution. After extractive work-up and evaporation of the solvent, the residue was purified by flash column chromatography (SiO<sub>2</sub>, 100% hexane) to furnish the title compound (1.5 g, 53%) as a colorless liquid.

**<sup>1</sup>H NMR** (400 MHz, CDCl<sub>3</sub>): δ 7.34-7.31 (m, 2H), 7.24-7.20 (m, 3H), 6.42 (dd, *J* = 18.0, 10.8 Hz, 1H), 5.27 (d, *J* = Hz, 1H), 5.07 (dd, *J* = 22.8, 10.8 Hz, 3H), 2.68 (t, *J* = 8.0 Hz, 2H), 2.29 (t, *J* = 7.6 Hz, 2H), 1.76-1.68 (m, 2H), 1.64-1.56 (m, 2H)

**<sup>13</sup>C NMR** (100 MHz, CDCl<sub>3</sub>): δ 146.2, 142.6, 138.9, 128.3, 128.2, 125.6, 115.6, 113.1, 35.8, 31.4, 31.2, 27.7

**LRMS** (CI) Calcd. For C<sub>14</sub>H<sub>18</sub> [M]<sup>+</sup>: 186, Found: 186

**FTIR** (neat): 3086, 3026, 2932, 2858, 1594, 1496, 1453, 1030, 991, 893, 744, 697 cm<sup>-1</sup>

<sup>5</sup> Guerinot, A.; Reymond, S.; Cossy, J. *Angew. Chem. Int. Ed.* **2007**, *46*, 6521

<sup>6</sup> Smith, S.M.; Takacs, J.M. *J. AM. CHEM. SOC.* **2010**, *132*, 1740

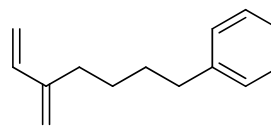

Compound 2f

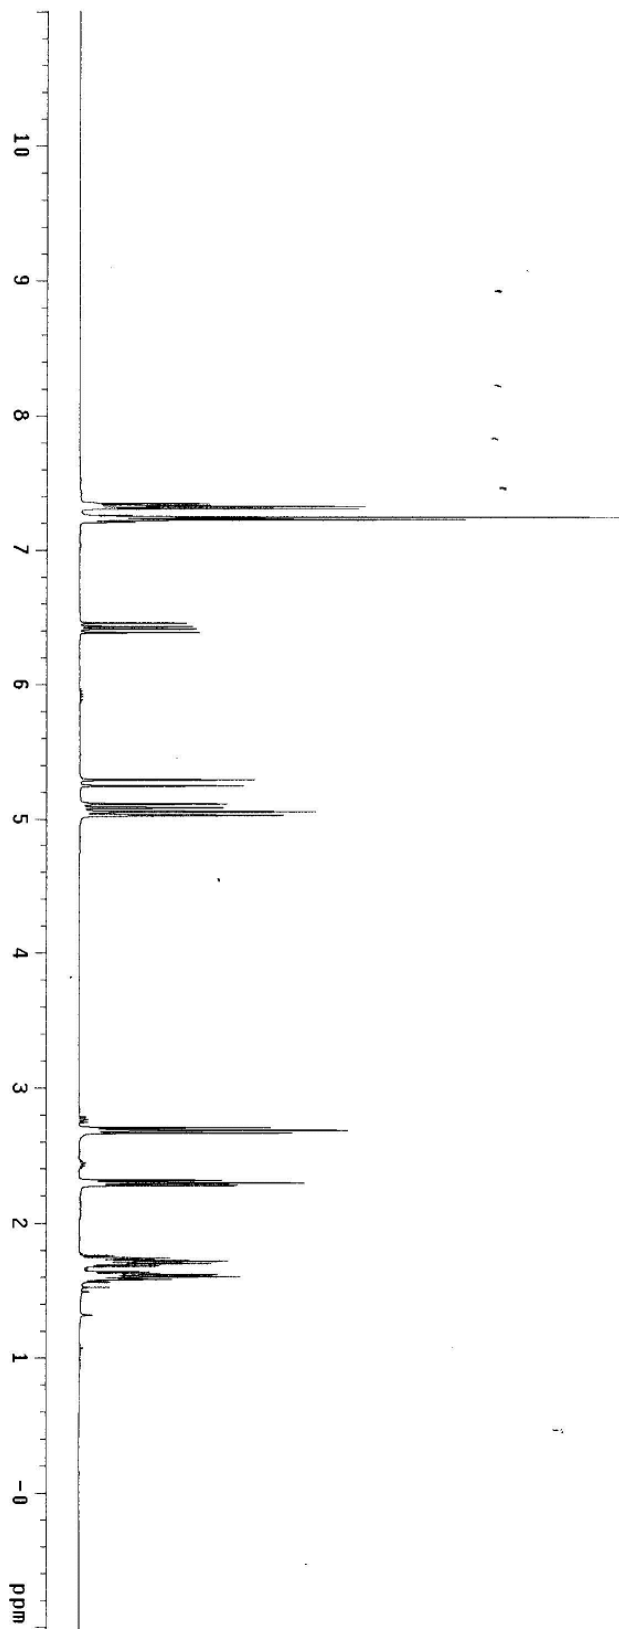

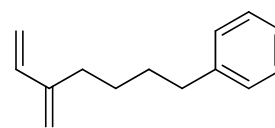

Compound 2f

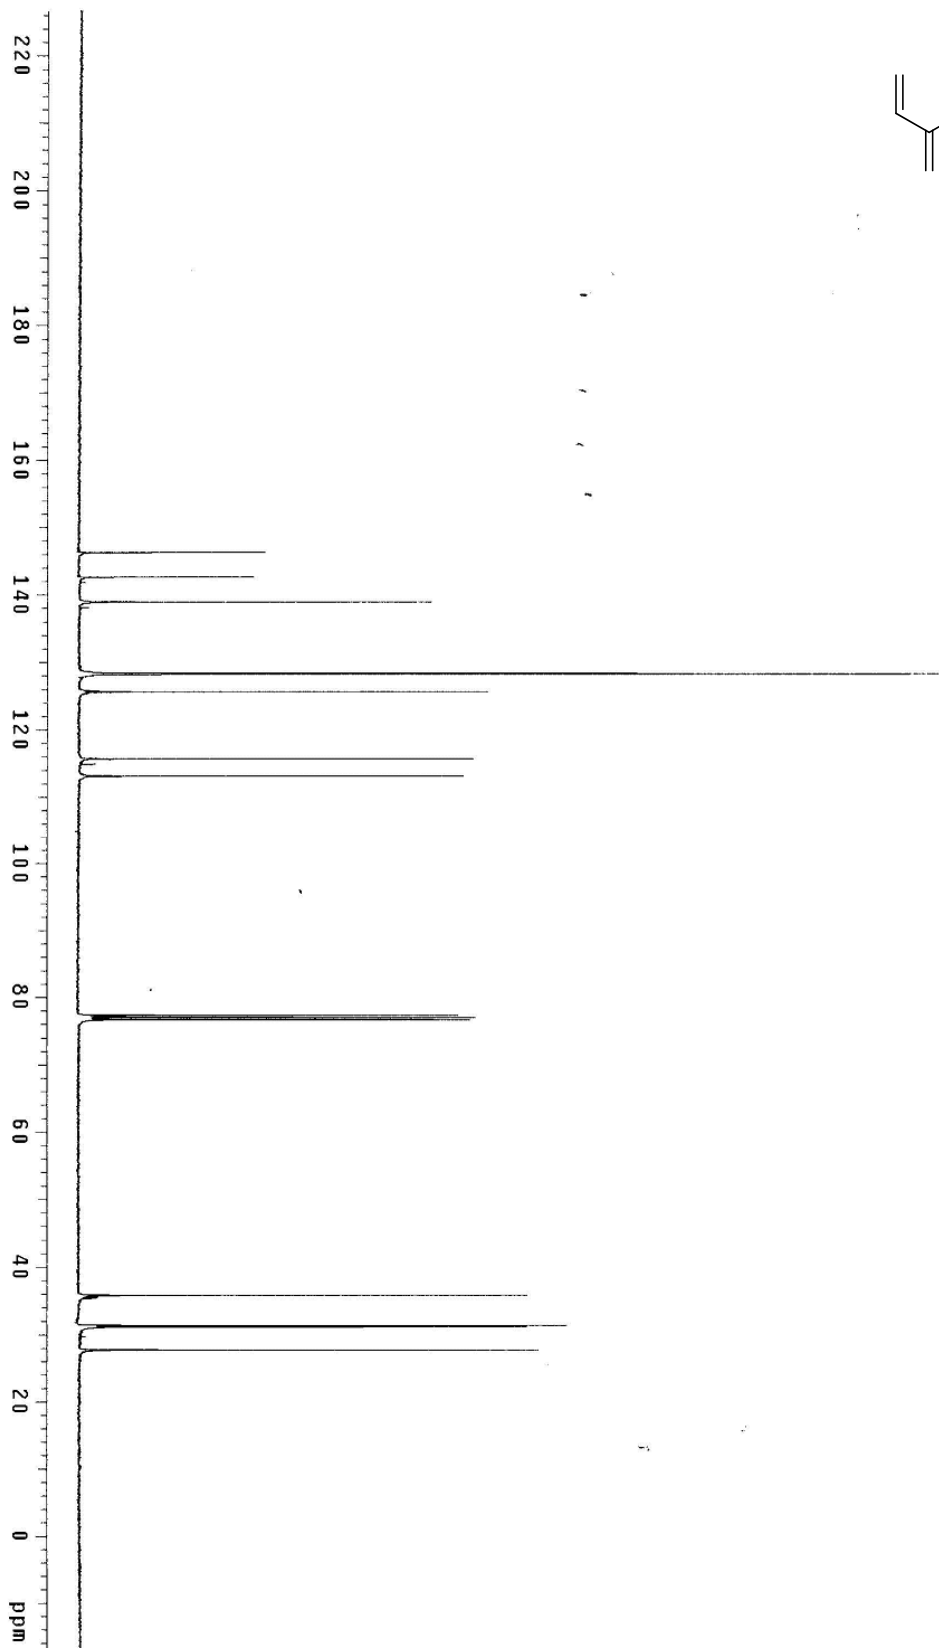

## **Experimental Procedures and Spectroscopic Data for the Coupling of Dienes with 3-Hydroxy-2-oxindole**

### **General Procedures for the Coupling of Isoprene with 3-Hydroxy-2-oxindole 1a-1f**

To a pressure tube equipped with magnetic stir bar was added Ru<sub>3</sub>(CO)<sub>12</sub> (2.5 mg, 0.004 mmol, 2 mol%) and PCy<sub>3</sub> (6.7 mg, 0.024 mmol, 12 mol%). The tube was then sealed with a rubber septum and purged with argon. At this stage, 3-hydroxy-2-oxindole **1a-1f** (0.200 mmol, 100 mol%), PhMe (0.1 mL, 2.0 M concentration with respect to 3-hydroxy-2-oxindole), and isoprene (20.0 μL, 0.200 mmol, 100 mol%) were added. The rubber septum was quickly replaced with a screw cap. The reaction was heated to 110 °C for the indicated time. The reaction mixture was concentrated *in vacuo* and purified by flash column chromatography (SiO<sub>2</sub>) under the conditions noted to furnish prenylated 3-hydroxy-2-oxindole.

### **General Procedures for the Coupling of Myrcene with 3-Hydroxy-2-oxindole 1a-1f**

To a pressure tube equipped with magnetic stir bar was added Ru<sub>3</sub>(CO)<sub>12</sub> (2.5 mg, 0.004 mmol, 2 mol%) and PCy<sub>3</sub> (6.7 mg, 0.024 mmol, 12 mol%). The tube was then sealed with a rubber septum and purged with argon. At this stage, 3-hydroxy-2-oxindole **1a-1f** (0.200 mmol, 100 mol%), PhMe (0.1 mL, 2.0 M concentration with respect to 3-hydroxy-2-oxindole), and myrcene (34.3 μL, 0.200 mmol, 100 mol%) were added. The rubber septum was quickly replaced with a screw cap. The reaction was heated to 110 °C for the indicated time. The reaction mixture was concentrated *in vacuo* and purified by flash column chromatography (SiO<sub>2</sub>) under the conditions noted to furnish geranylated 3-hydroxy-2-oxindole.

### **General Procedures for the Coupling of Dienes 2c-2f with 3-Hydroxy-2-oxindole 1a**

To a pressure tube equipped with magnetic stir bar was added Ru<sub>3</sub>(CO)<sub>12</sub> (2.5 mg, 0.004 mmol, 2 mol%) and PCy<sub>3</sub> (6.7 mg, 0.024 mmol, 12 mol%). The tube was then sealed with a rubber septum and purged with argon. At this stage, 3-hydroxy-2-oxindole **1a** (0.200 mmol, 100 mol%), PhMe (0.1 mL, 2.0 M concentration with respect to 3-hydroxy-2-oxindole), and dienes **2c-2f** (100-300 mol%) were added. The rubber septum was quickly replaced with a screw cap. The reaction was heated to 110 °C for the indicated time. The reaction mixture was concentrated *in vacuo* and purified by flash column chromatography (SiO<sub>2</sub>).

**Experimental Procedures and Spectroscopic Data for Prenylated 3-Hydroxy-2-oxindole 3a-3f**

**1-benzyl-3-hydroxy-3-(3-methylbut-2-en-1-yl)indolin-2-one (3a)**

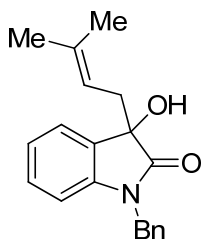

**General Procedure:** The reaction was heated for 24 hours, concentrated *in vacuo* and purified by flash column chromatography (SiO<sub>2</sub>, 15% EtOAc/Hexane) to furnish the title compound (51.0 mg, 83%) as a white solid.

**<sup>1</sup>H NMR** (400 MHz, CDCl<sub>3</sub>): δ 7.40 (dd, *J* = 7.6, 0.8 Hz, 1H), 7.32-7.24 (m, 5H), 7.18 (td, *J* = 7.6, 1.2 Hz, 1H), 7.05 (td, *J* = 7.6, 1.2 Hz, 1H), 6.65 (d, *J* = 8.0 Hz, 1H), 5.14 (d, *J* = 16.0 Hz, 1H), 4.91-4.86 (m, 1H), 4.59 (d, *J* = 15.6 Hz, 1H), 3.66 (s, 1H), 2.84 (dd, *J* = 14.0, 8.8 Hz, 1H), 2.74 (dd, *J* = 13.6, 6.4 Hz, 1H), 1.61 (s, 3H), 1.55 (s, 3H)

**<sup>13</sup>C NMR** (100 MHz, CDCl<sub>3</sub>): δ 178.4, 142.5, 137.1, 135.5, 130.0, 129.4, 128.7, 127.5, 127.0, 123.9, 122.9, 115.9, 109.3, 76.4, 43.7, 37.5, 25.9, 17.9

**LRMS** (CI) Calcd. For C<sub>20</sub>H<sub>22</sub>NO<sub>2</sub> [M+H]<sup>+</sup>: 308, Found: 308

**FTIR** (neat): 2969, 2398, 2287, 1736, 1436, 1373, 1229, 1216, 1045, 905 cm<sup>-1</sup>

**Mp:** 112.1-112.5 °C

**TLC** (SiO<sub>2</sub>): R<sub>f</sub> = 0.4 (ethyl acetate: hexanes, 1:4)



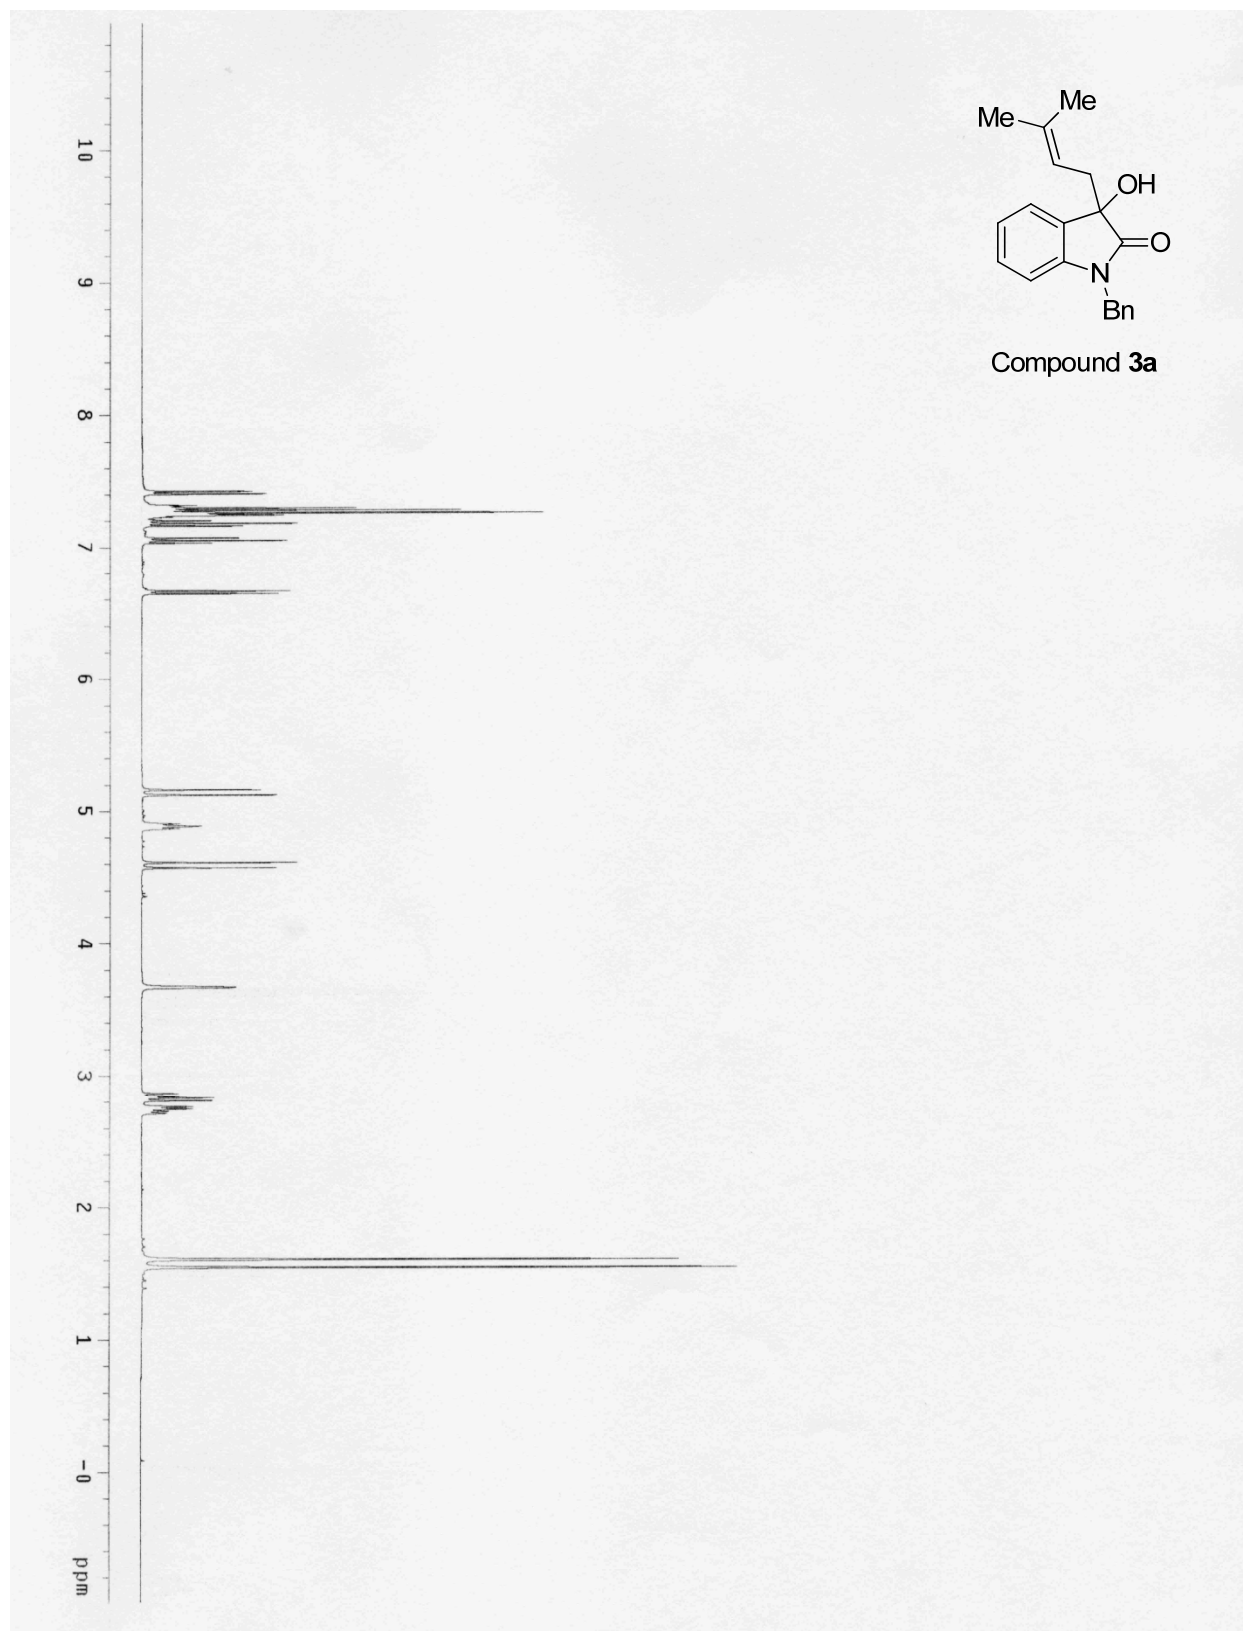

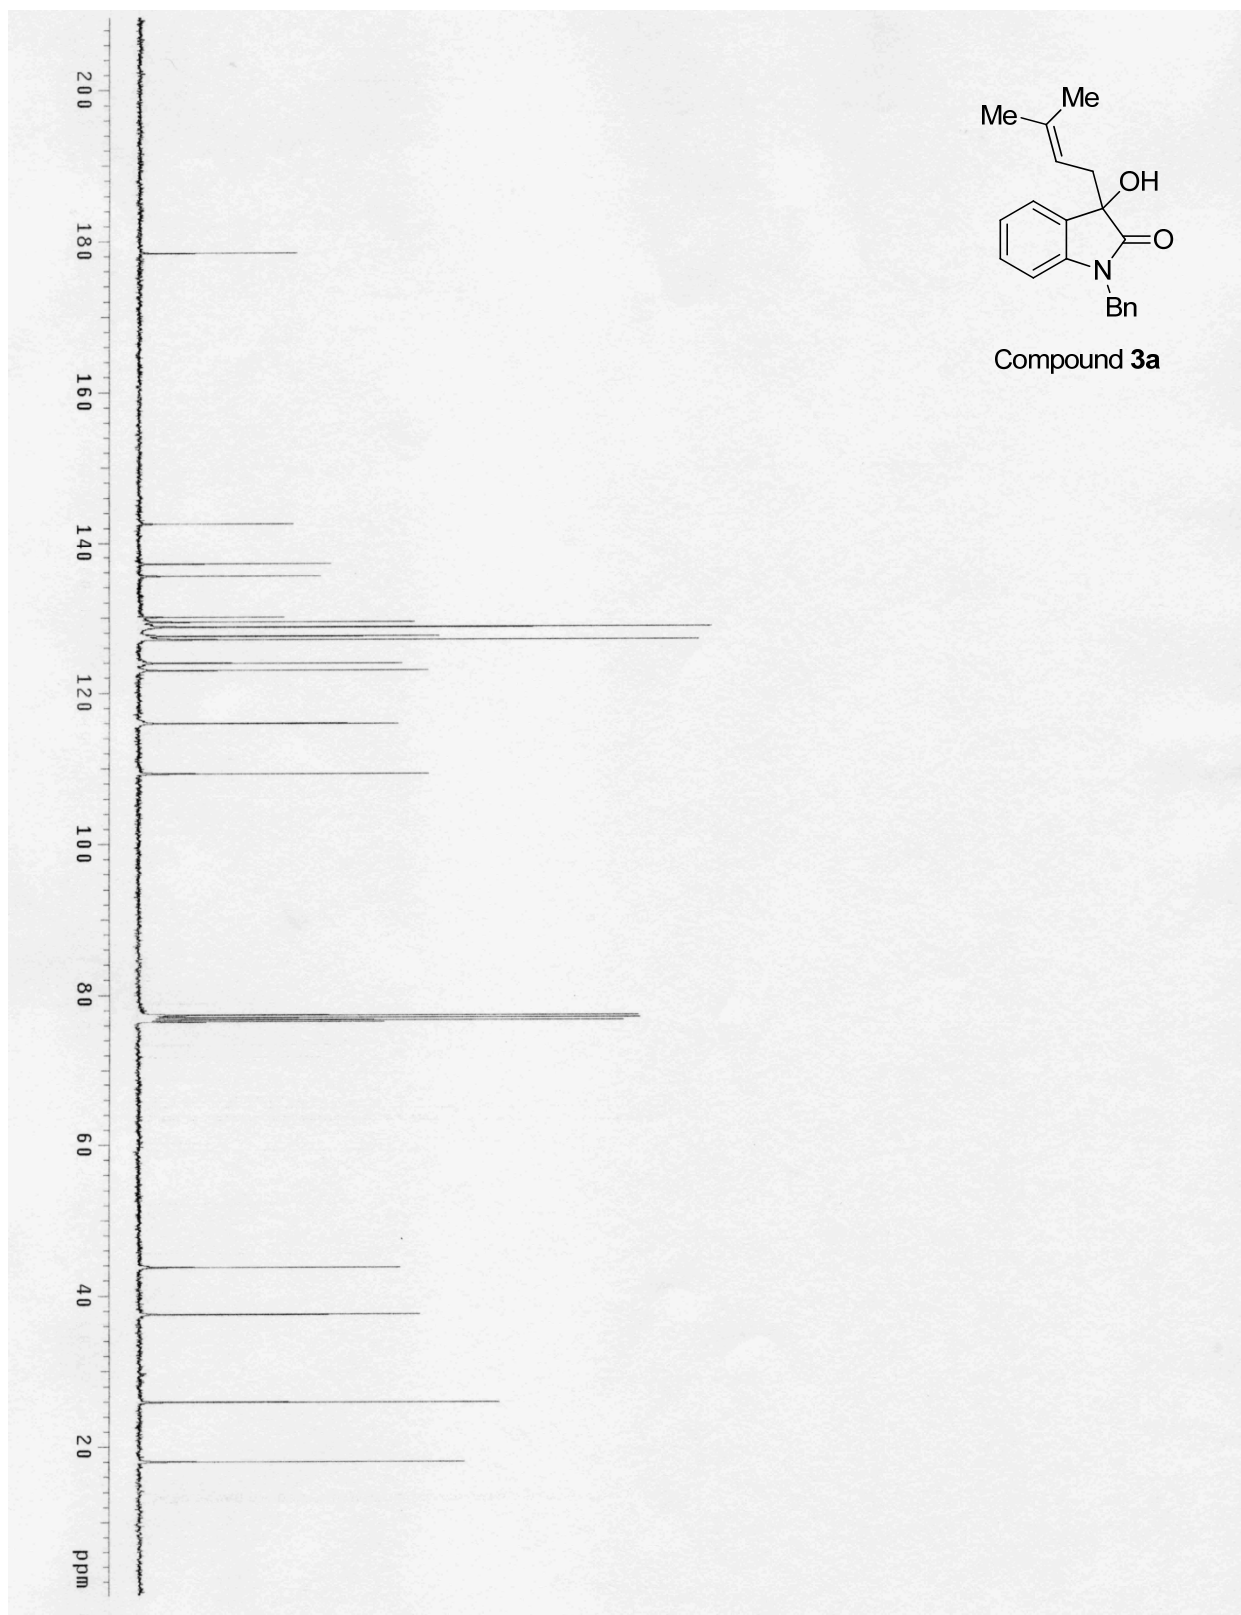

**1-benzyl-3-hydroxy-5-methyl-3-(3-methylbut-2-en-1-yl)indolin-2-one (3b)**

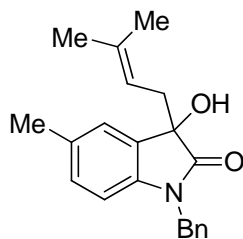

**General Procedure:** The reaction was heated for 24 hours, concentrated *in vacuo* and purified by flash column chromatography (SiO<sub>2</sub>, 15% EtOAc/Hexane) to furnish the title compound (57.8 mg, 90%) as a white solid.

**<sup>1</sup>H NMR** (400 MHz, CDCl<sub>3</sub>): δ 7.31-7.22 (m, 6H), 6.99-6.97 (m, 1H), 6.54 (d, *J* = 8.0 Hz, 1H), 5.11 (d, *J* = 15.6 Hz, 1H), 4.92-4.88 (m, 1H), 4.59 (d, *J* = 15.6 Hz, 1H), 3.02 (s, 1H), 2.81 (dd, *J* = 13.6, 8.8 Hz, 1H), 2.68 (dd, *J* = 13.6, 6.4 Hz, 1H), 2.31 (s, 3H), 1.63 (s, 3H), 1.57 (s, 3H)

**<sup>13</sup>C NMR** (100 MHz, CDCl<sub>3</sub>): δ 178.0, 140.2, 137.3, 135.6, 132.6, 129.9, 129.7, 128.7, 127.5, 127.1, 124.7, 115.9, 109.1, 76.4, 43.7, 37.6, 25.9, 21.0, 18.0

**LRMS** (CI) Calcd. For C<sub>21</sub>H<sub>24</sub>NO<sub>2</sub> [M+H]<sup>+</sup>: 322, Found: 322

**FTIR** (neat): 3336, 2914, 1690, 1619, 1601, 1490, 1436, 1370, 1343, 1285, 1192, 1138, 1080, 1001, 800, 693 cm<sup>-1</sup>

**Mp:** 178.0-178.6 °C

**TLC** (SiO<sub>2</sub>): R<sub>f</sub> = 0.4 (ethyl acetate: hexanes, 1:4)

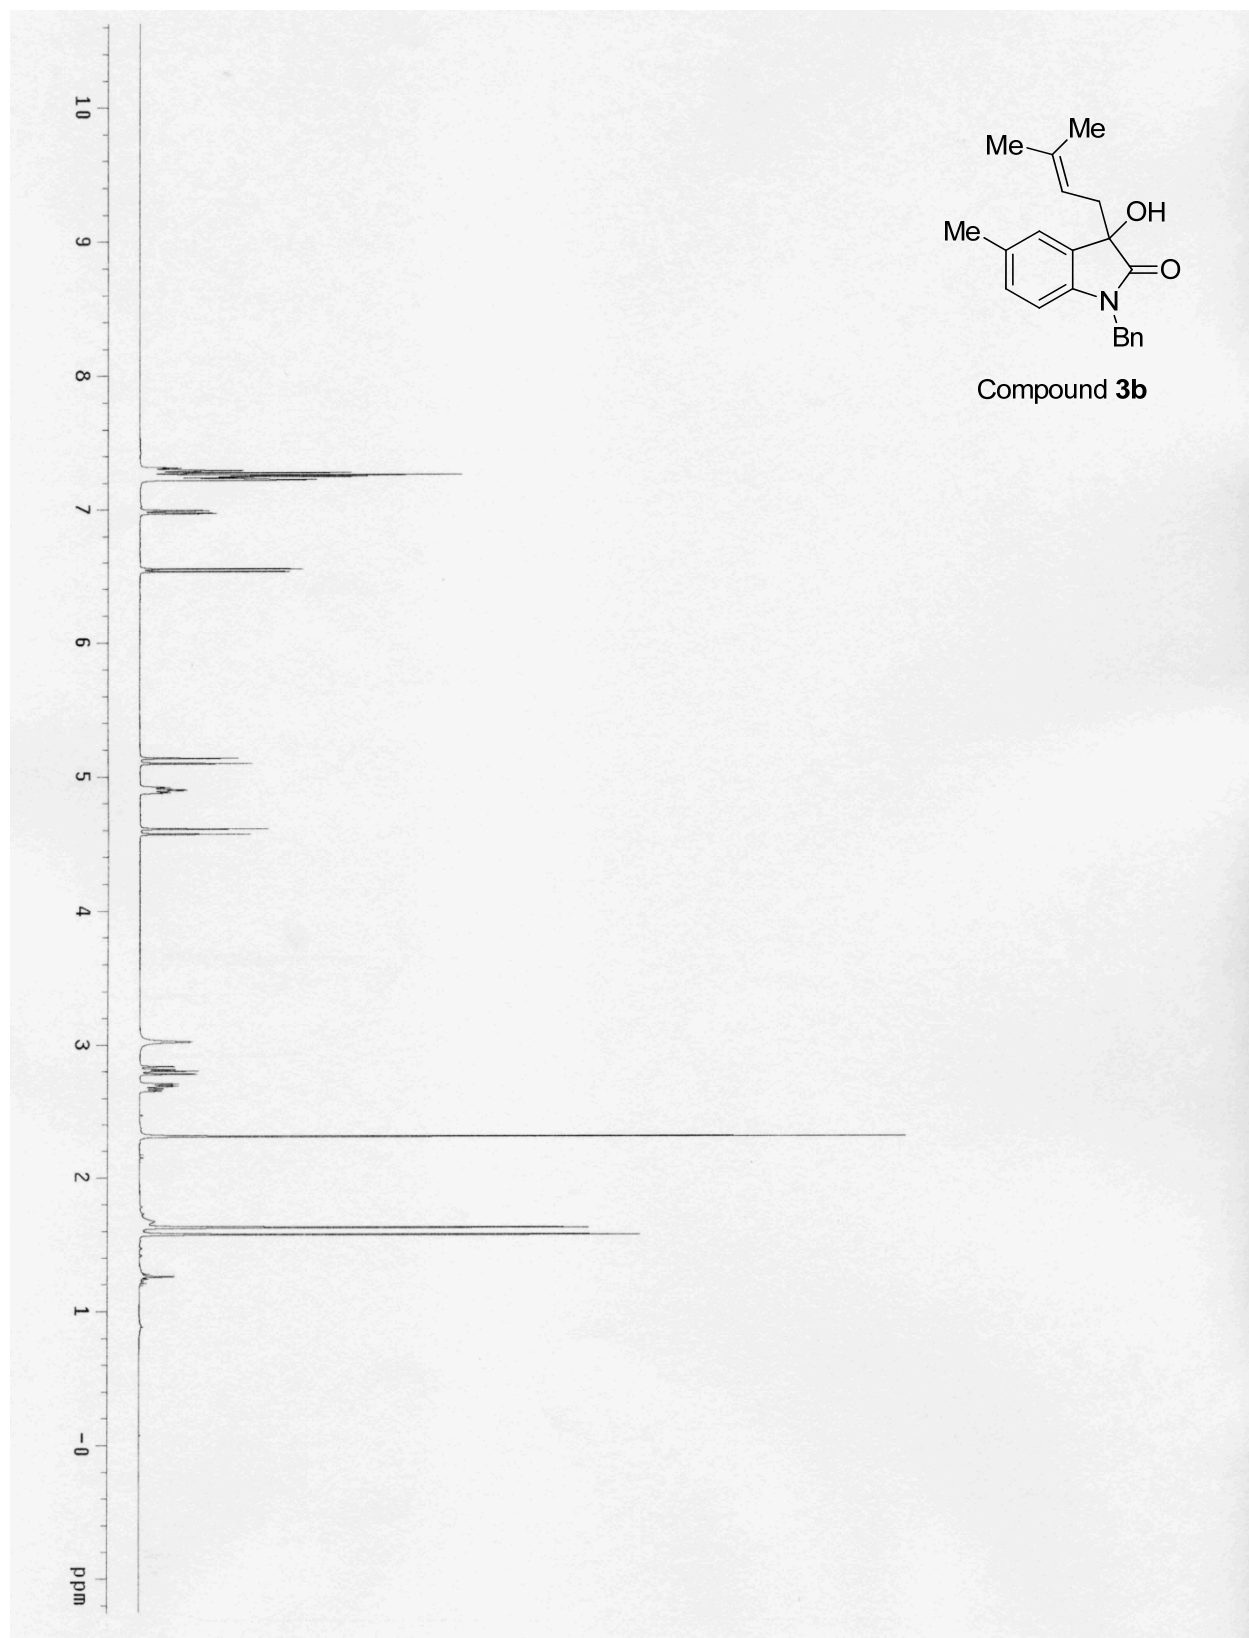

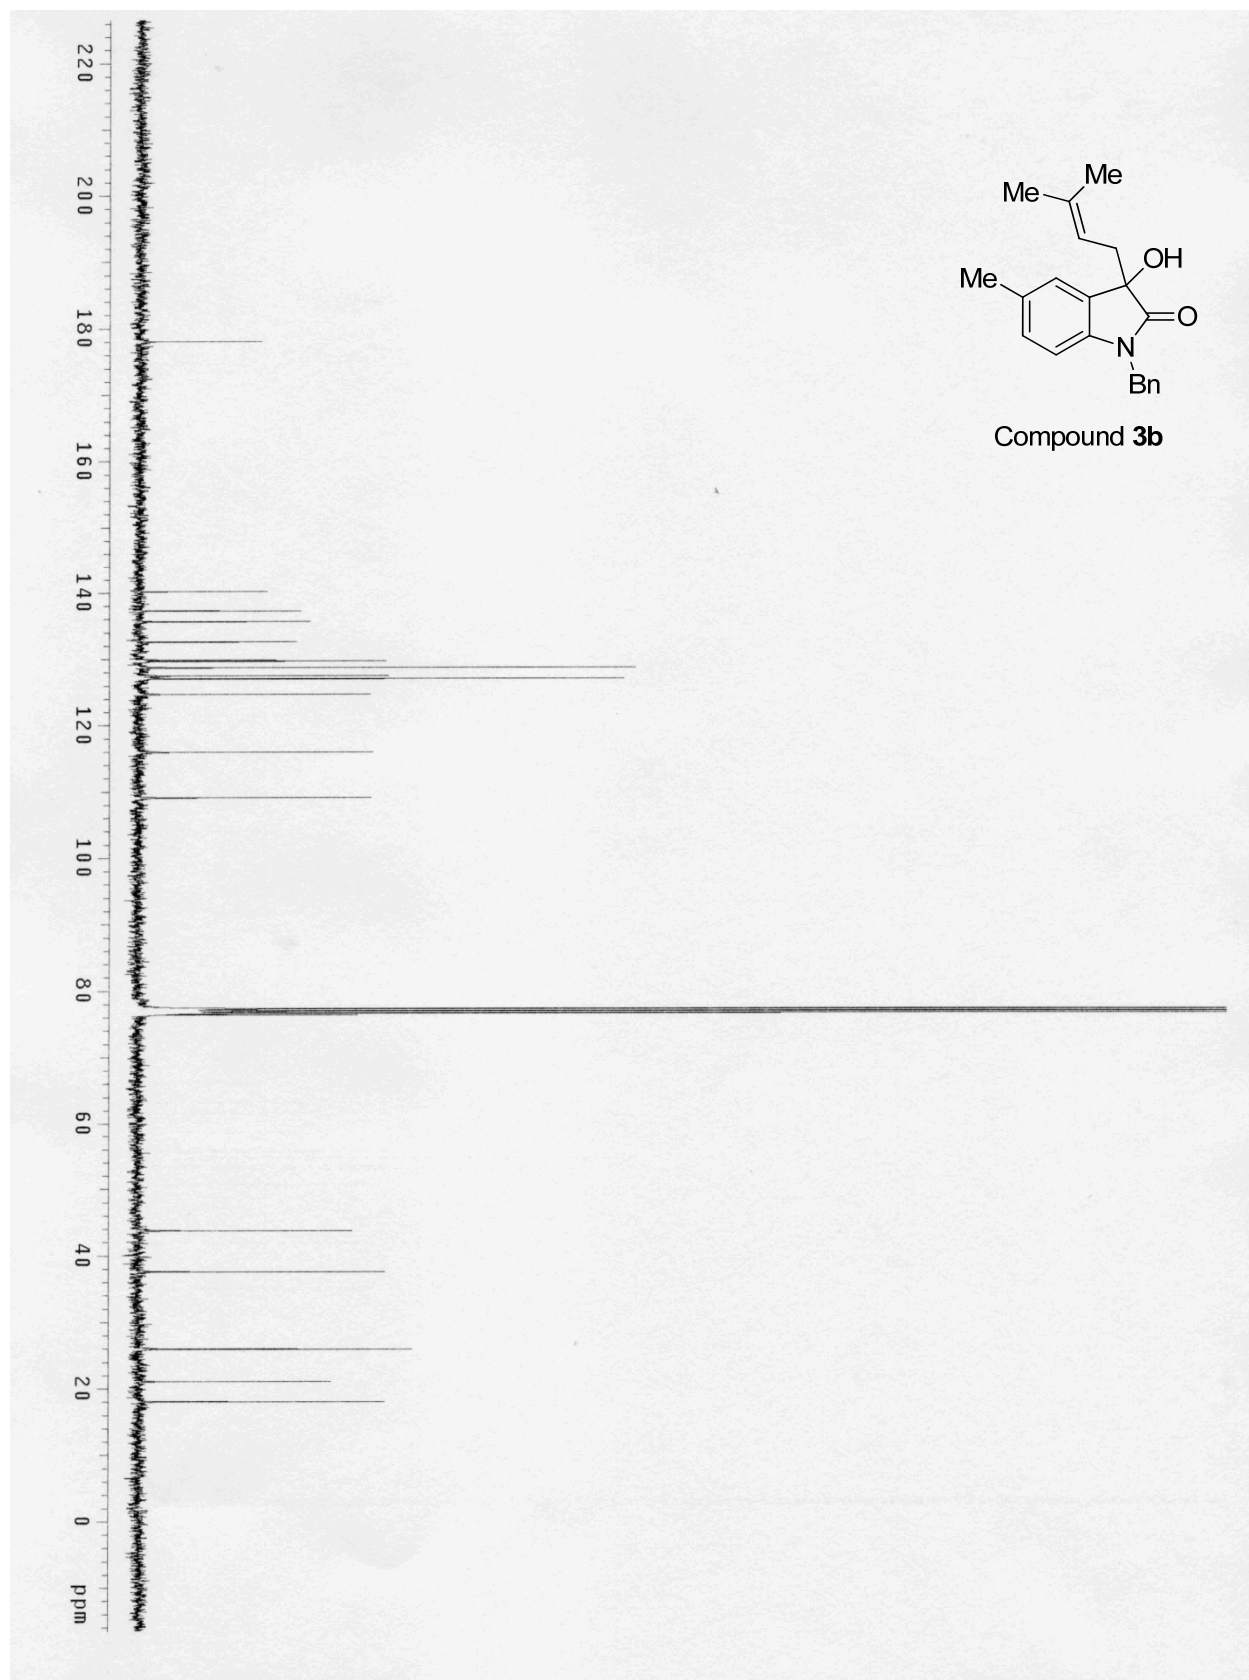

**1-benzyl-3-hydroxy-5-methoxy-3-(3-methylbut-2-en-1-yl)indolin-2-one (3c)**

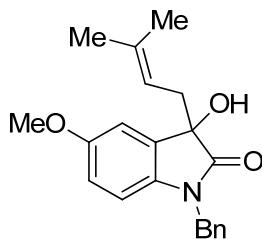

**General Procedure:** The reaction was heated for 24 hours, concentrated *in vacuo* and purified by flash column chromatography (SiO<sub>2</sub>, 15% EtOAc/Hexane) to furnish the title compound (59.9 mg, 89%) as a white solid.

**<sup>1</sup>H NMR** (400 MHz, CDCl<sub>3</sub>): δ 7.32-7.23 (m, 5H), 7.23 (d, *J* = 2.4 Hz, 1H), 6.71 (dd, *J* = 8.4, 2.8 Hz, 1H), 6.55 (d, *J* = 8.8 Hz, 1H), 5.11 (d, *J* = 16.0 Hz, 1H), 4.95-4.90 (m, 1H), 4.59 (d, *J* = 15.6 Hz, 1H), 3.77 (s, 3H), 3.84 (s, 1H), 2.79 (dd, *J* = 13.6, 8.8 Hz, 1H), 2.68 (dd, *J* = 13.6, 6.4 Hz, 1H), 1.64 (s, 3H), 1.58 (s, 3H)

**<sup>13</sup>C NMR** (100 MHz, CDCl<sub>3</sub>): δ 177.9, 156.2, 137.3, 135.9, 135.6, 131.1, 128.7, 127.5, 127.1, 115.8, 114.1, 110.9, 109.9, 76.6, 55.8, 43.8, 37.6, 25.9, 18.0

**LRMS** (CI) Calcd. For C<sub>21</sub>H<sub>24</sub>NO<sub>3</sub> [M+H]<sup>+</sup>: 338, Found: 338

**FTIR** (neat): 3377, 2919, 1698, 1601, 1492, 1436, 1281, 1032, 694 cm<sup>-1</sup>

**Mp:** 165.8-166.3 °C

**TLC** (SiO<sub>2</sub>): R<sub>f</sub> = 0.4 (ethyl acetate: hexanes, 1:4)

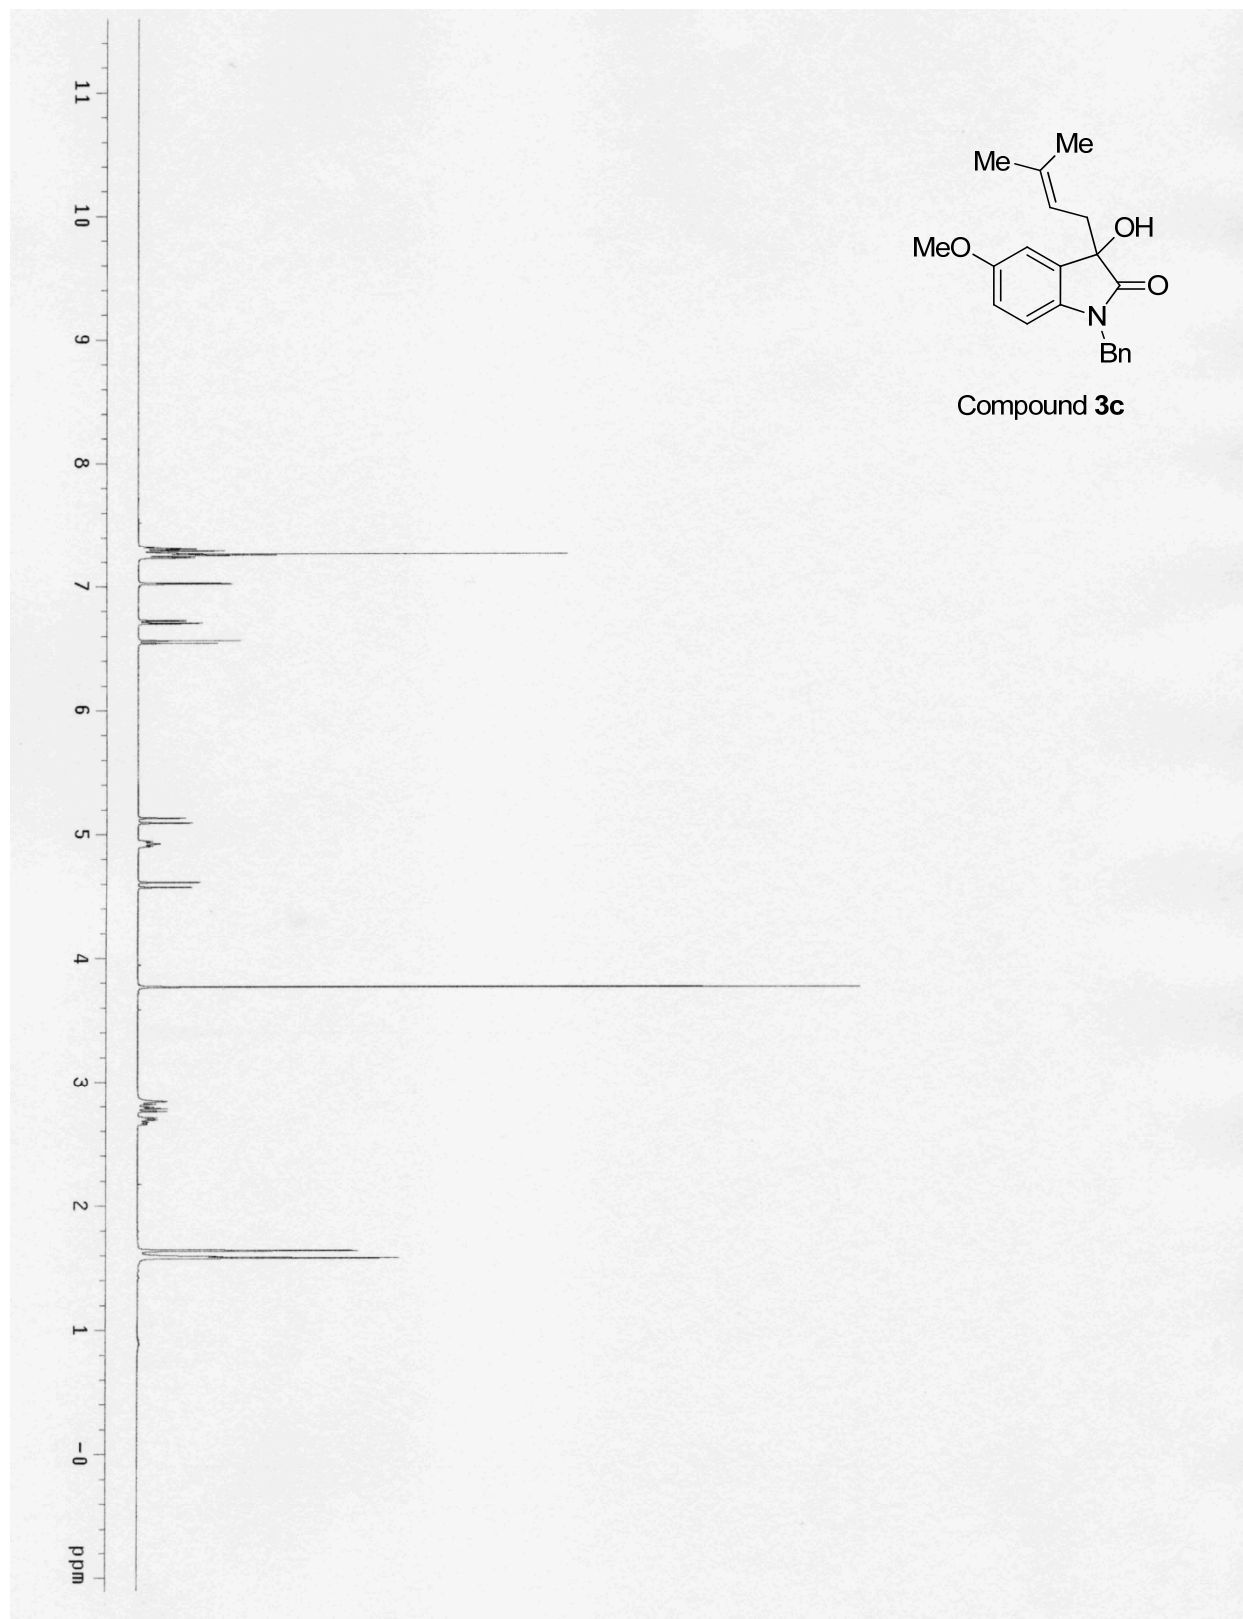

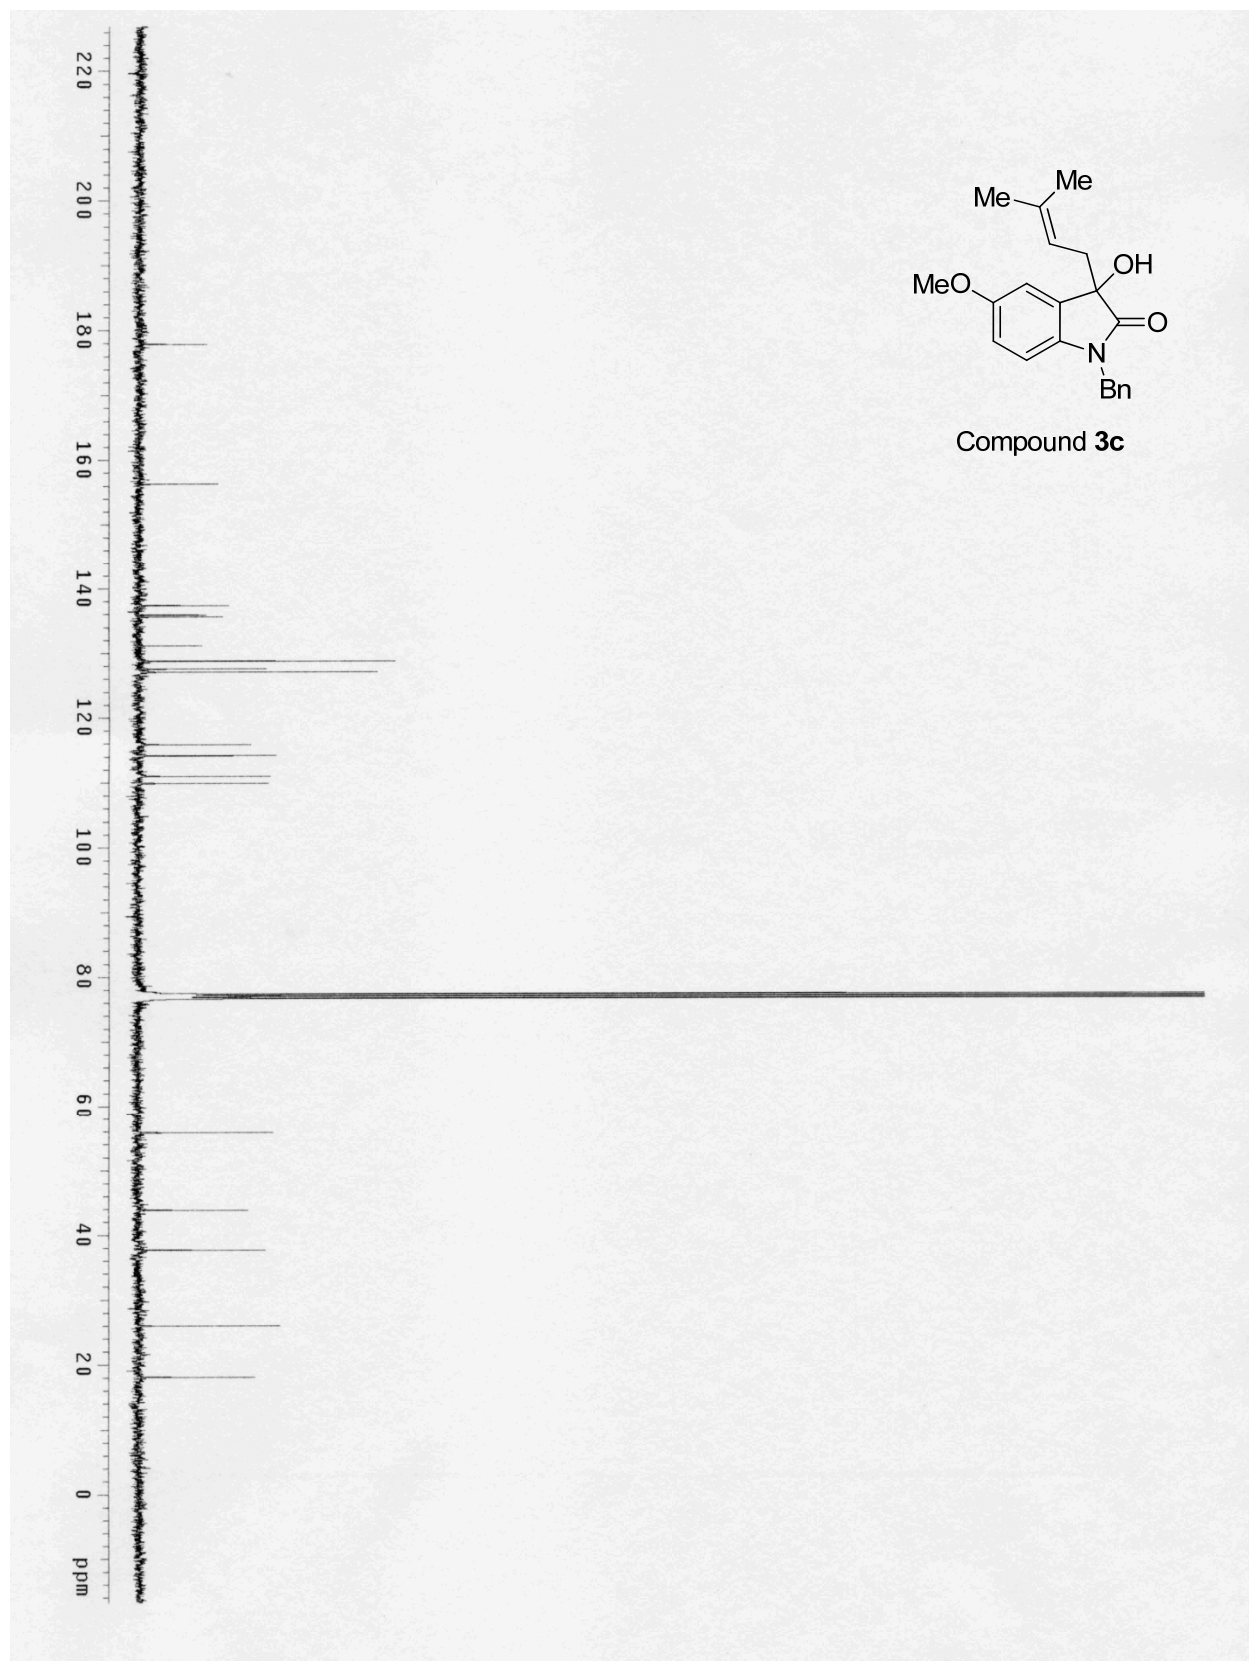



**1-benzyl-6-chloro-3-hydroxy-3-(3-methylbut-2-en-1-yl)indolin-2-one (3d)**

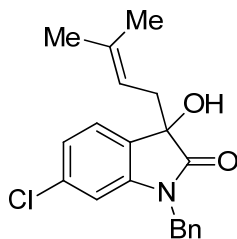

**General Procedure:** The reaction was heated for 24 hours, concentrated *in vacuo* and purified by flash column chromatography (SiO<sub>2</sub>, 15% EtOAc/Hexane) to furnish the title compound (58.1 mg, 85%) as a white solid.

**<sup>1</sup>H NMR** (400 MHz, CDCl<sub>3</sub>): δ 7.35-7.23 (m, 6H), 7.03 (dd, *J* = 8.0, 2.0 Hz, 1H), 6.65 (d, *J* = 2.0 Hz, 1H), 5.11 (d, *J* = 16.0 Hz, 1H), 4.91-4.87 (m, 1H), 4.58 (d, *J* = 16.0 Hz, 1H), 2.77 (dd, *J* = 14.0, 8.8 Hz, 1H), 2.75 (s, 1H), 2.68 (dd, *J* = 14.0, 6.4 Hz, 1H), 1.63 (s, 3H), 1.56 (s, 3H)

**<sup>13</sup>C NMR** (100 MHz, CDCl<sub>3</sub>): δ 177.9, 143.9, 137.9, 135.3, 134.9, 128.9, 128.2, 127.8, 127.0, 124.9, 122.9, 115.4, 109.9, 75.9, 43.9, 37.5, 25.9, 18.0

**LRMS** (CI) Calcd. For C<sub>20</sub>H<sub>21</sub>ClNO<sub>2</sub> [M+H]<sup>+</sup>: 342, Found: 342

**FTIR** (neat): 3390, 2919, 1717, 1606, 1490, 1432, 1375, 1067, 987, 845, 698 cm<sup>-1</sup>

**Mp:** 175.5-176.0 °C

**TLC** (SiO<sub>2</sub>): R<sub>f</sub> = 0.4 (ethyl acetate: hexanes, 1:4)

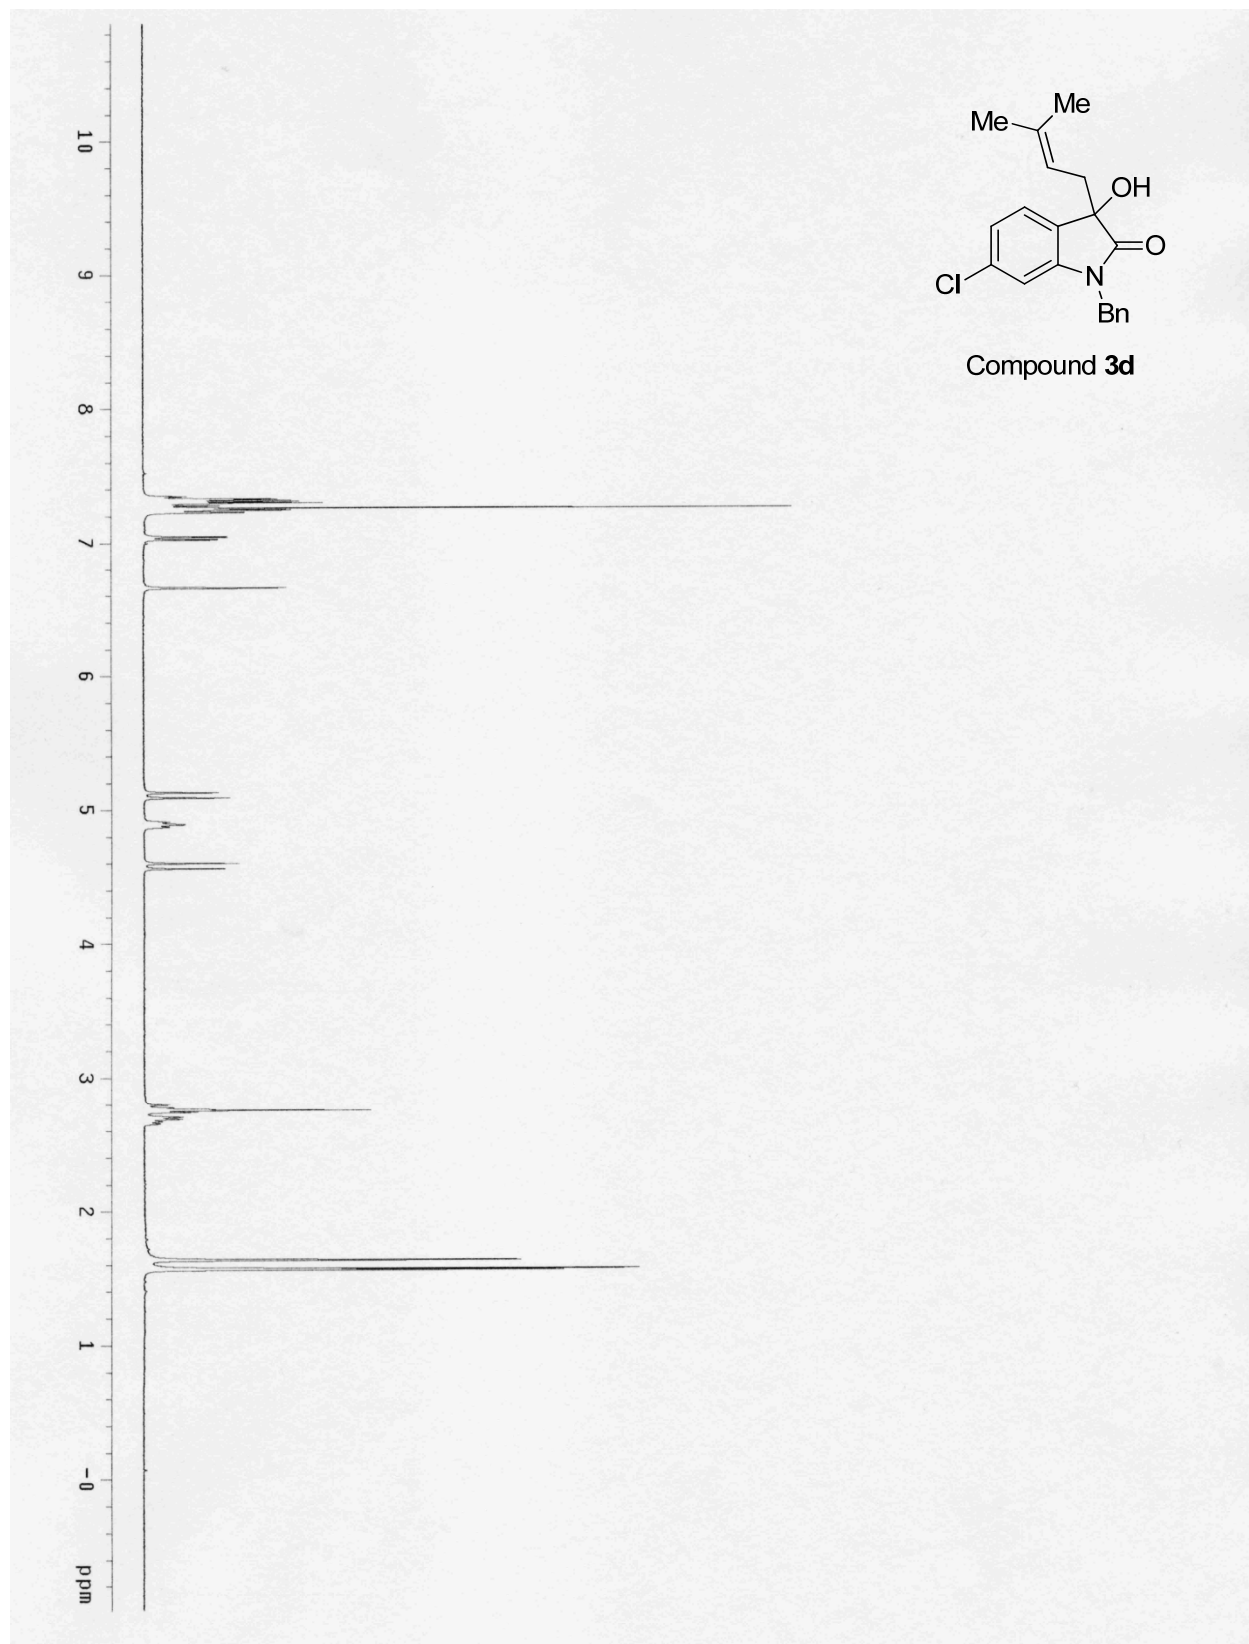

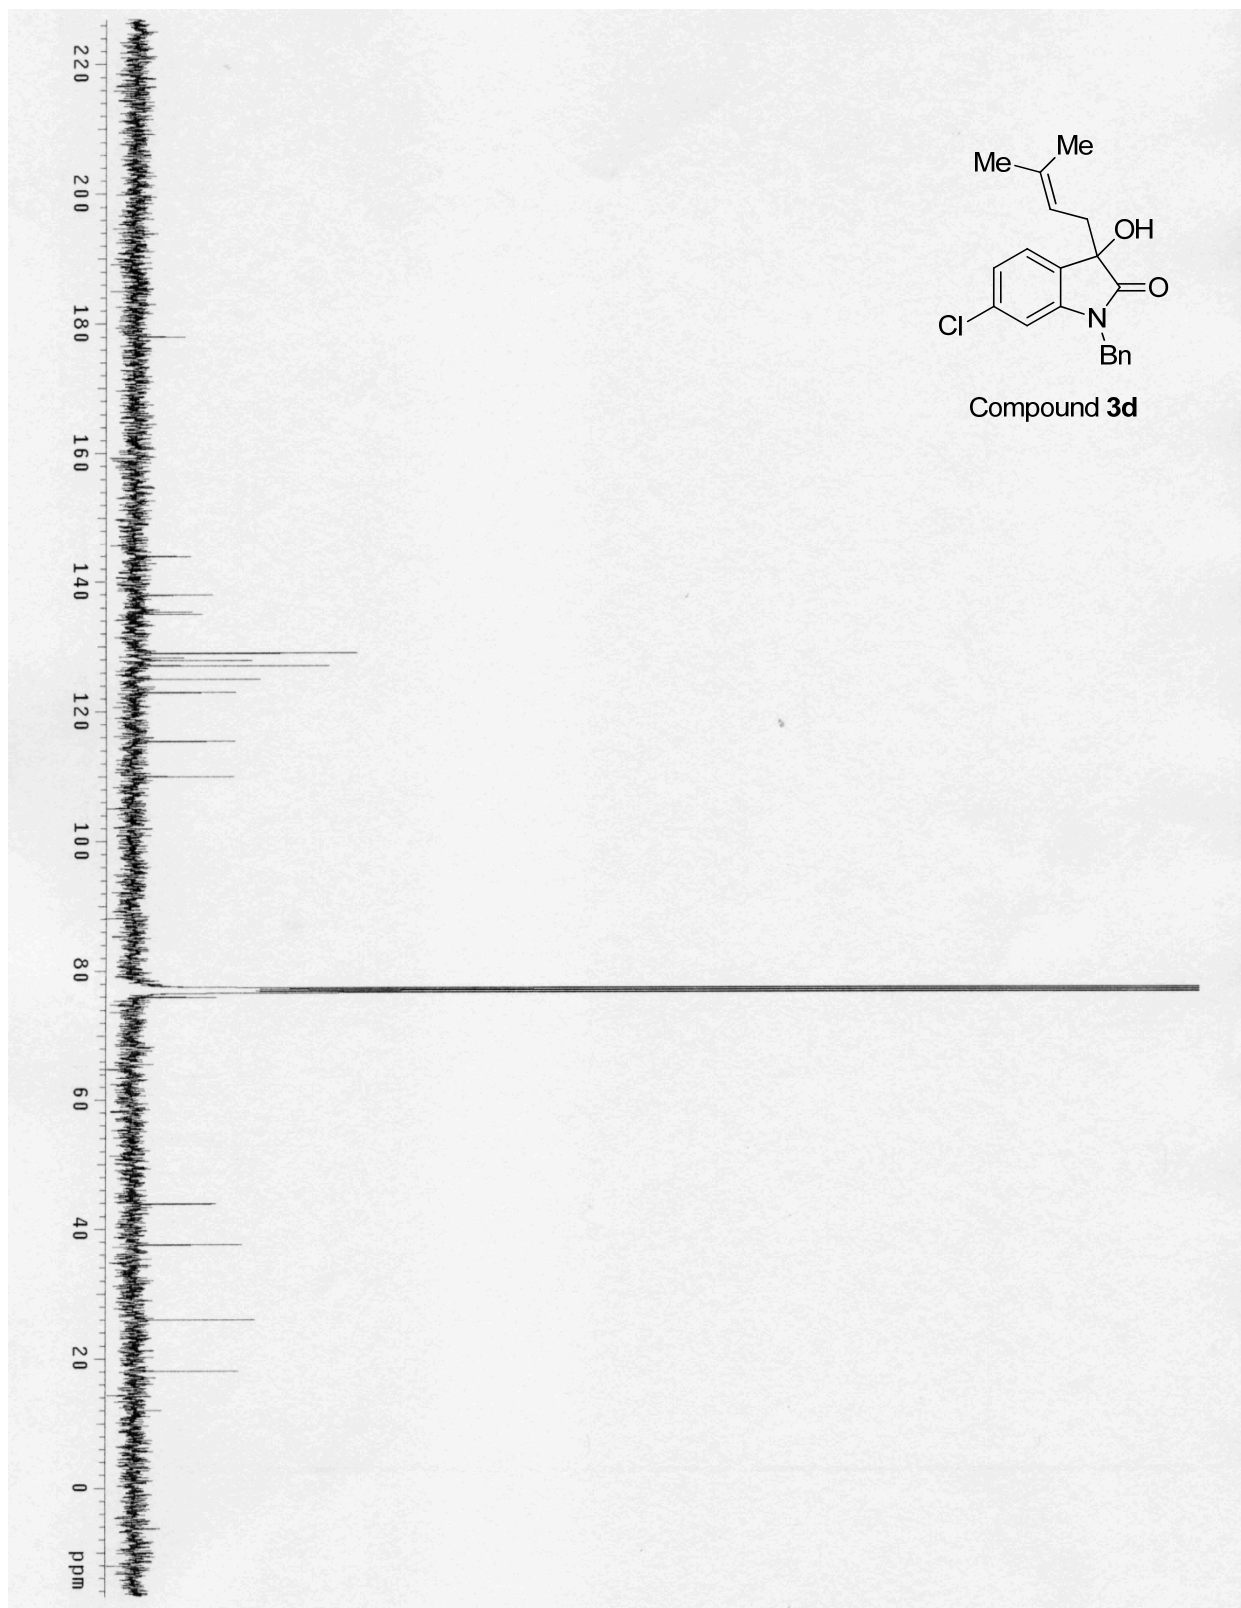

**1-benzyl-7-fluoro-3-hydroxy-3-(3-methylbut-2-en-1-yl)indolin-2-one (3e)**

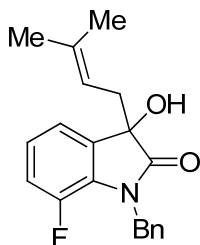

**General Procedure:** The reaction was heated for 24 hours, concentrated *in vacuo* and purified by flash column chromatography (SiO<sub>2</sub>, 15% EtOAc/Hexane) to furnish the title compound (53.3 mg, 82%) as a white solid.

**<sup>1</sup>H NMR** (400 MHz, CDCl<sub>3</sub>): δ 7.31-7.18 (m, 6H), 7.04-6.95 (m, 2H), 5.14 (d, *J* = 15.6 Hz, 1H), 4.91-4.86 (m, 2H), 2.82 (s, 1H), 2.75 (dd, *J* = 13.6, 8.8 Hz, 1H), 2.66 (dd, *J* = 13.6, 6.8 Hz, 1H), 1.60 (s, 3H), 1.54 (s, 3H)

**<sup>13</sup>C NMR** (100 MHz, CDCl<sub>3</sub>): δ 177.9, 147.4 (d, *J* = 243.3 Hz), 137.7, 136.7, 132.9, 129.1 (d, *J* = 8.1 Hz), 128.6, 127.5, 127.3 (d, *J* = 8.2 Hz), 123.8 (d, *J* = 6.0 Hz), 119.8 (d, *J* = 2.9 Hz), 117.7 (d, *J* = 20.1 Hz), 115.3, 76.3, 45.3 (d, *J* = 4.4 Hz), 37.6, 25.9, 17.9

**<sup>19</sup>F NMR** (376 MHz, CDCl<sub>3</sub>): δ -133.58– -133.59 (m)

**LRMS** (CI) Calcd. For C<sub>20</sub>H<sub>21</sub>FNO<sub>2</sub> [M+H]<sup>+</sup>: 326, Found: 326

**FTIR** (neat): 3373, 2923, 2358, 2336, 1722, 1633, 1486, 1357, 1245, 1192, 1081, 912, 725, 694 cm<sup>-1</sup>

**Mp:** 145.5-146.0 °C

**TLC** (SiO<sub>2</sub>): R<sub>f</sub> = 0.4 (ethyl acetate: hexanes, 1:4)

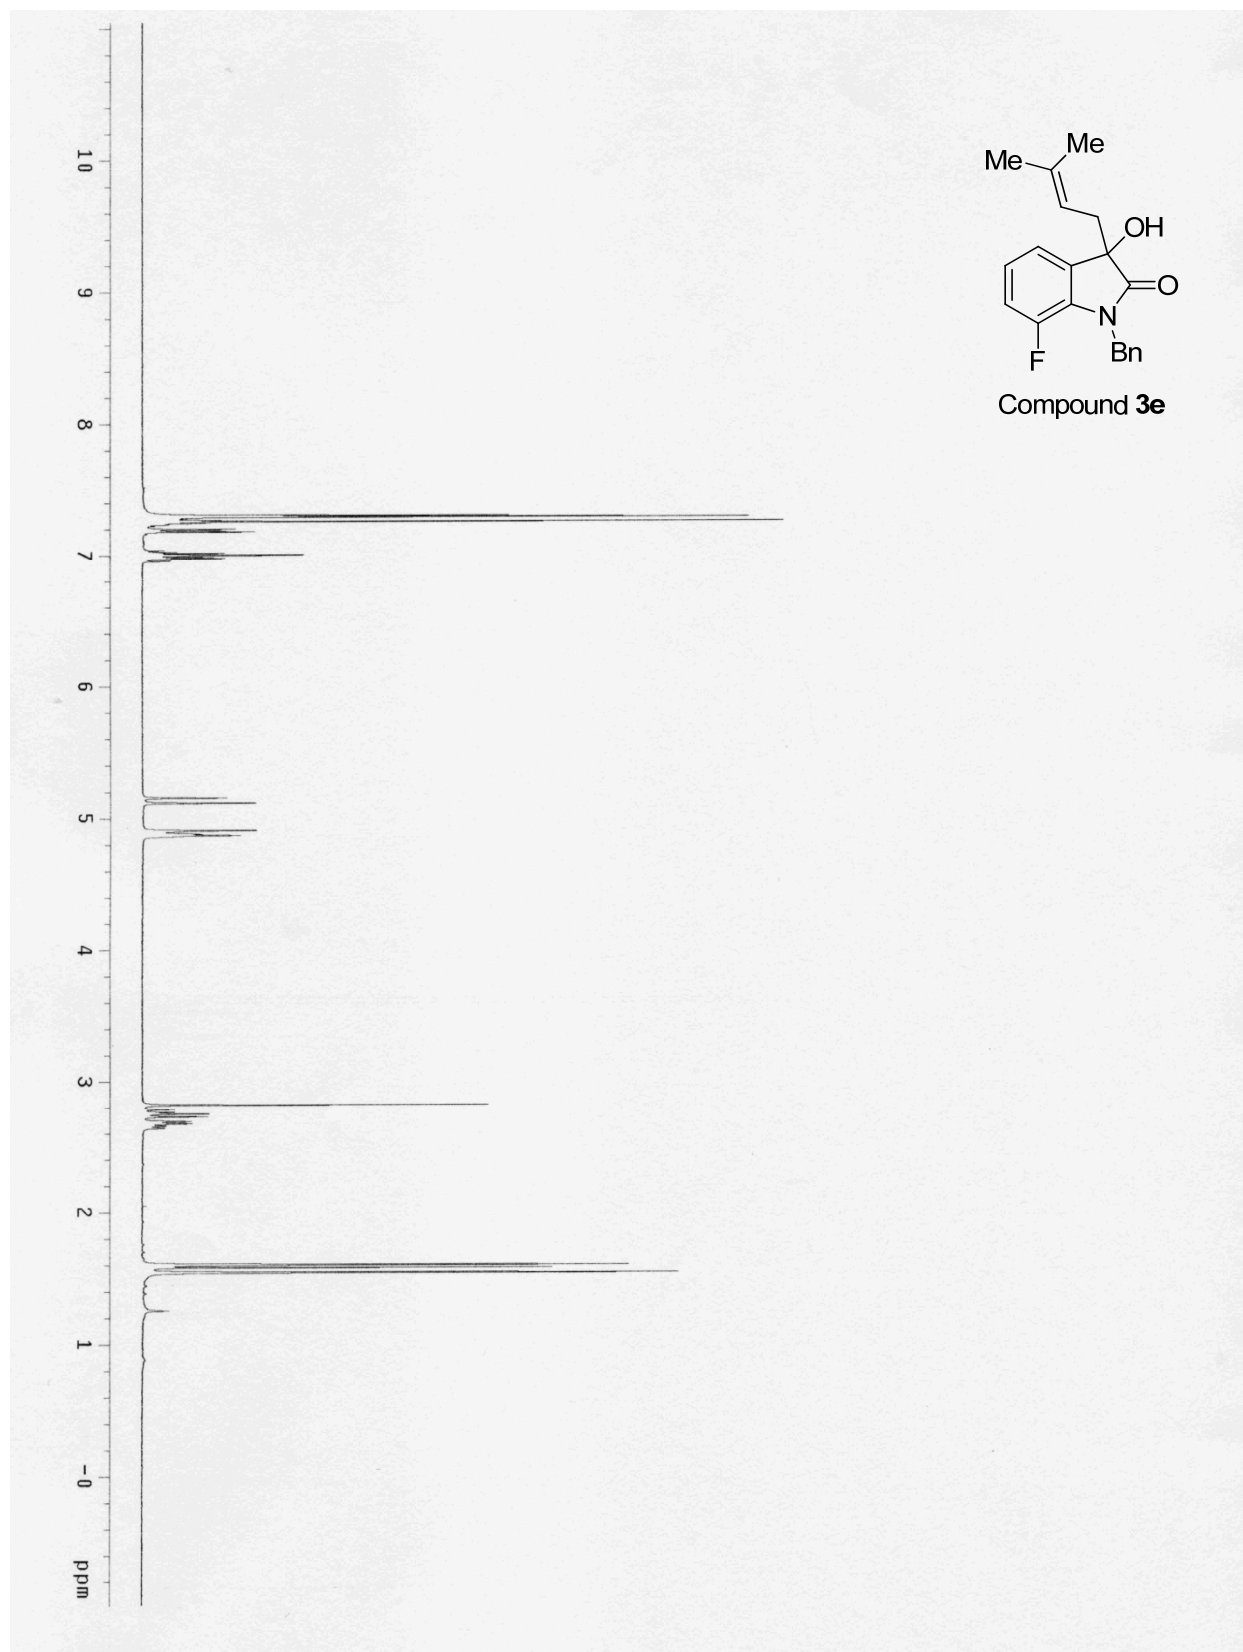

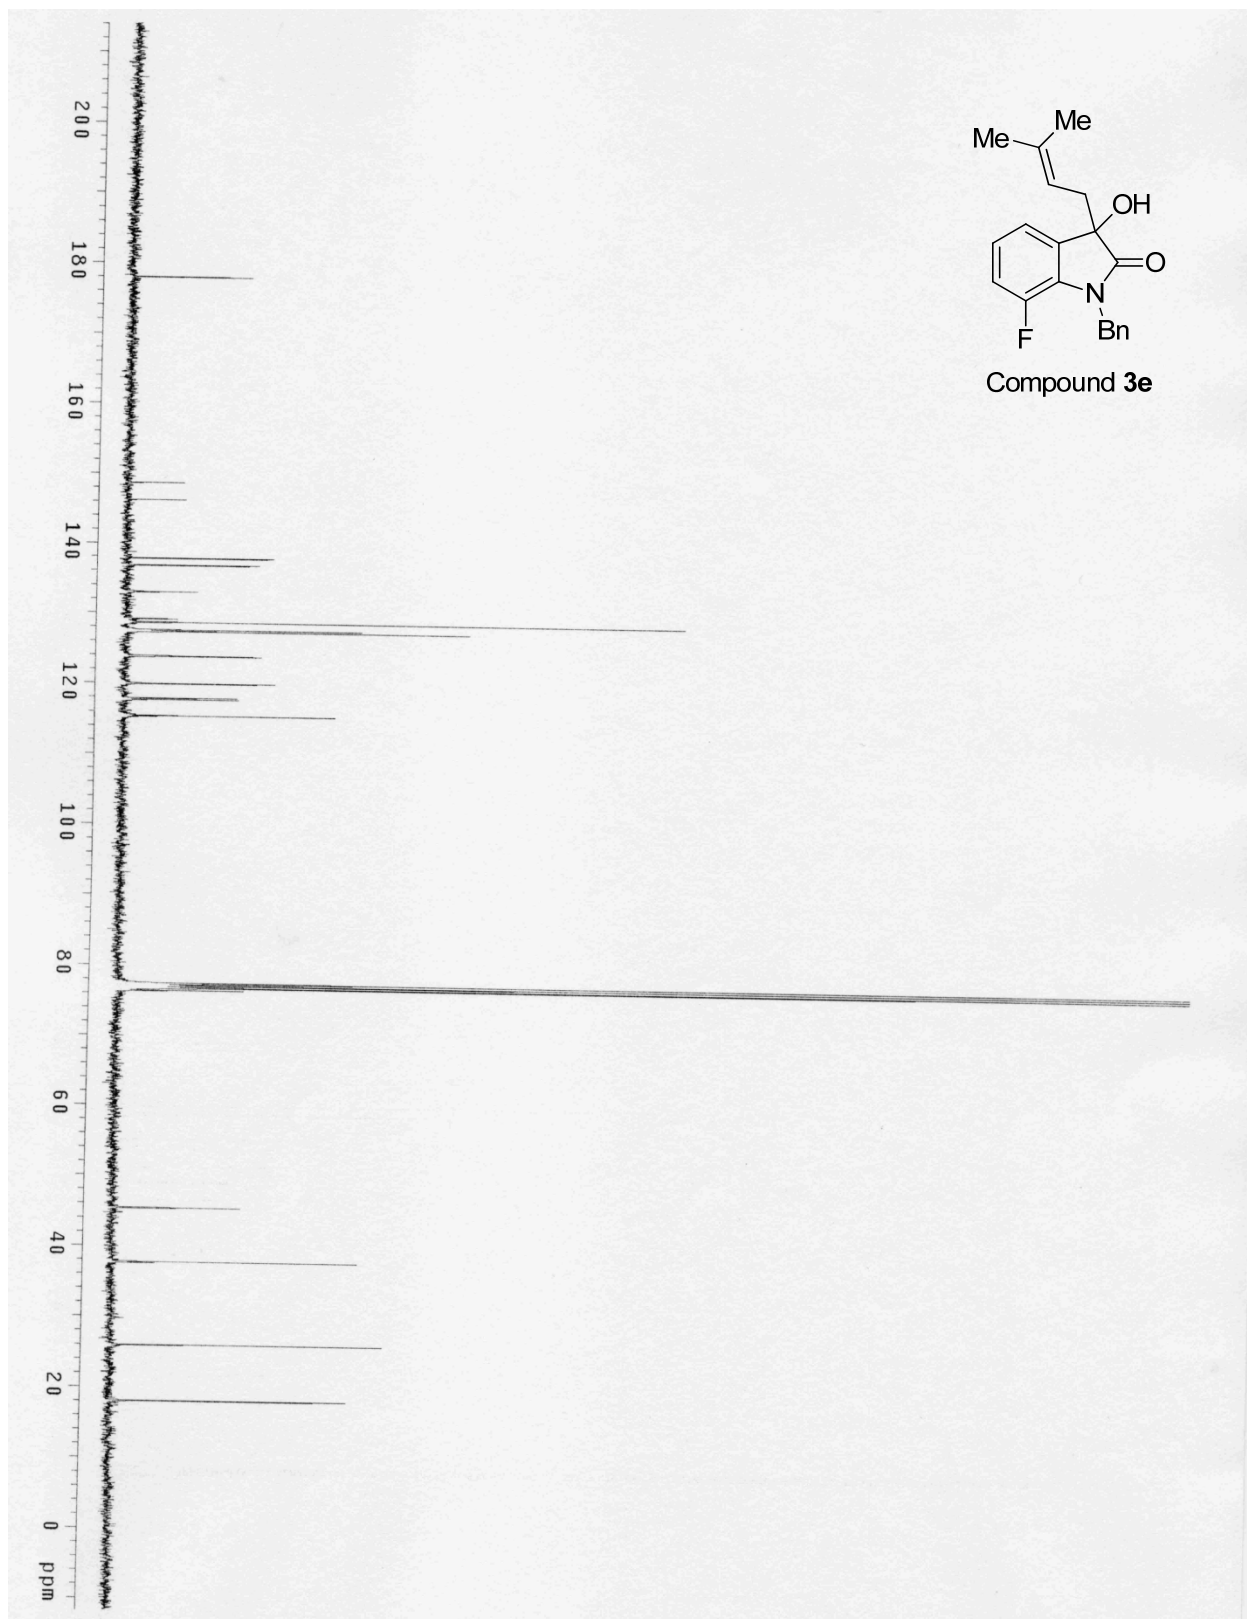

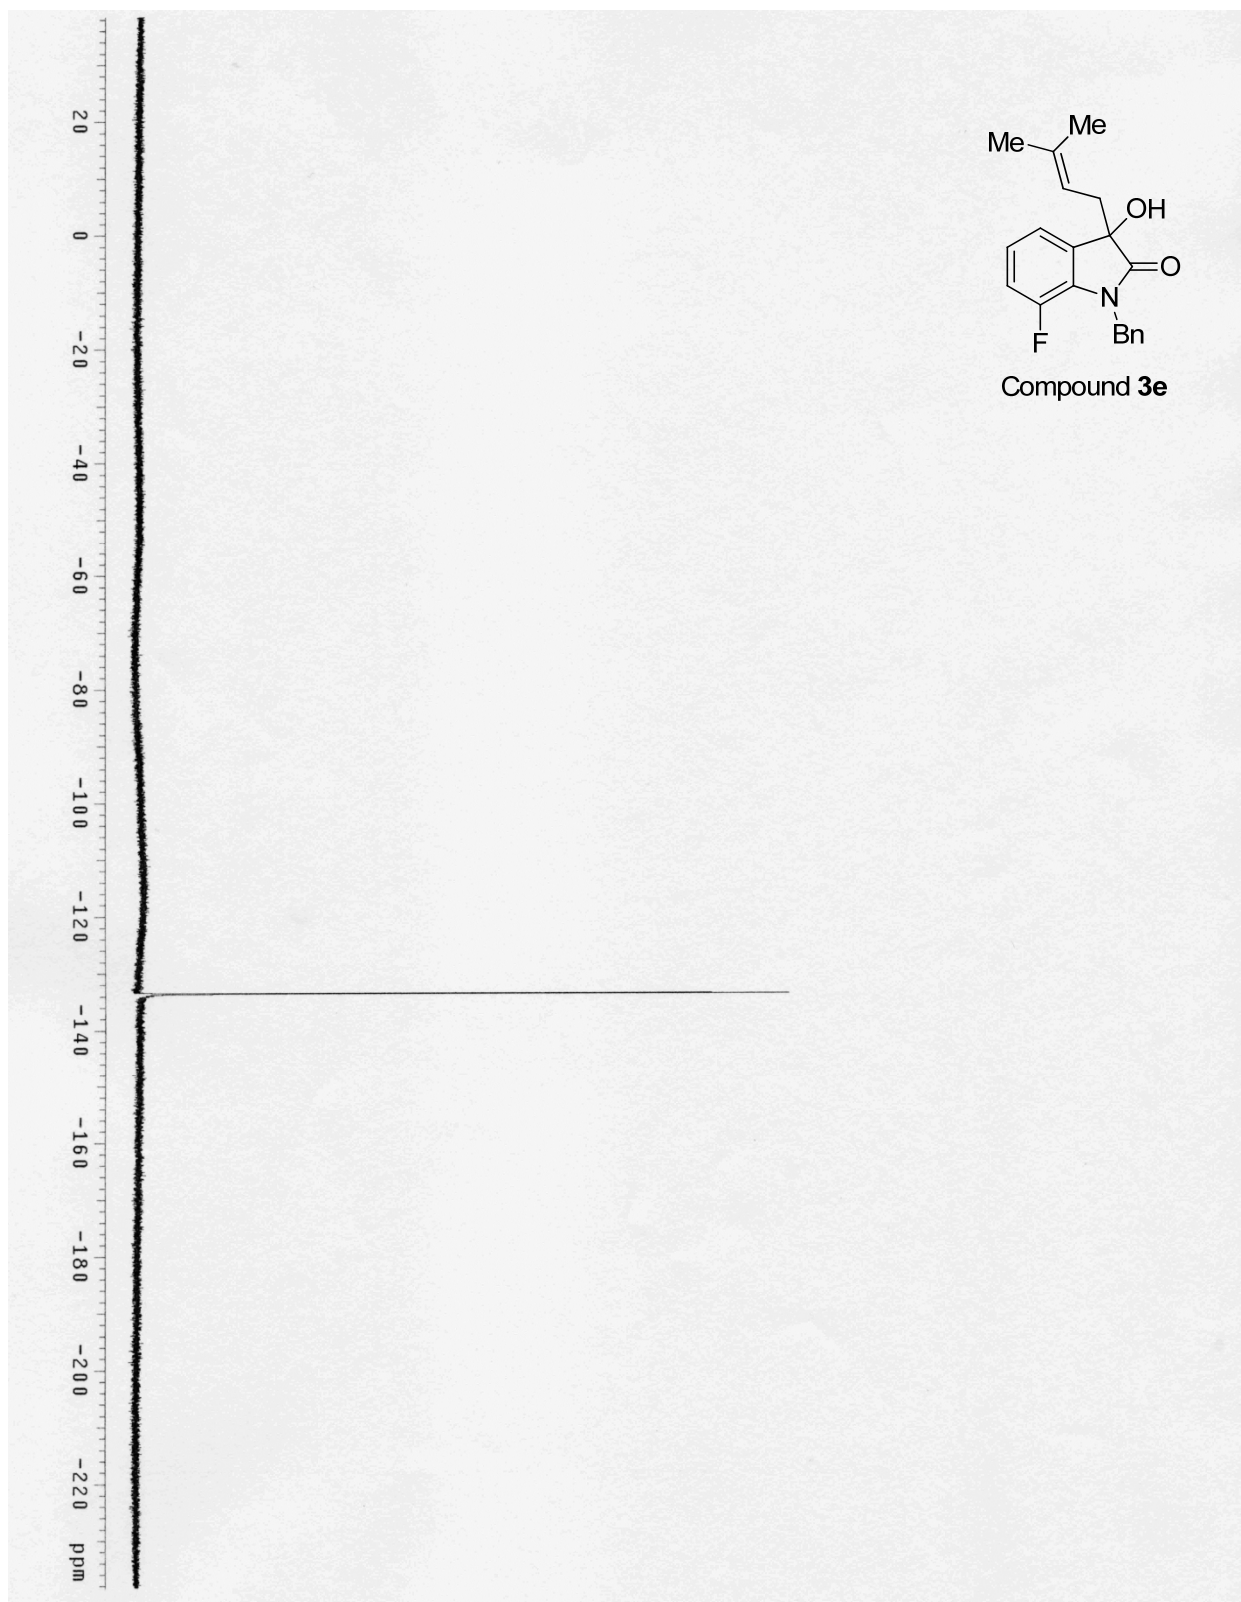

**1-benzyl-3-hydroxy-7,7-dimethyl-3-(3-methylbut-2-en-1-yl)-3,7-dihydropyrano[2,3-g]indol-2(1H)-one (3f)**

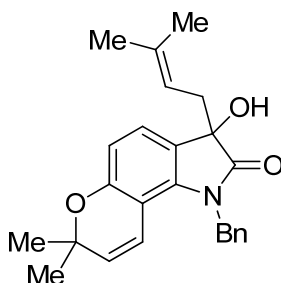

**General Procedure:** The reaction was heated for 24 hours, concentrated *in vacuo* and purified by flash column chromatography (SiO<sub>2</sub>, 15% EtOAc/Hexane) to furnish the title compound (69.8 mg, 90%) as a white solid.

**<sup>1</sup>H NMR** (400 MHz, CDCl<sub>3</sub>): δ 7.33-7.14 (m, 6H), 6.58 (dd, *J* = 8.0, 0.4 Hz, 1H), 6.27 (d, *J* = 10.0 Hz, 1H), 5.48 (d, *J* = 10.0 Hz, 1H), 5.35 (d, *J* = 16.8 Hz, 1H), 4.96-4.92 (m, 1H), 4.80 (d, *J* = 17.2 Hz, 1H), 2.89 (s, 1H), 2.82 (dd, *J* = 13.6, 8.8 Hz, 1H), 2.68 (dd, *J* = 13.6, 6.4 Hz, 1H), 1.68 (s, 3H), 1.57 (s, 3H), 1.34 (s, 3H), 1.29 (s, 3H)

**<sup>13</sup>C NMR** (100 MHz, CDCl<sub>3</sub>): δ 179.6, 154.8, 138.8, 137.4, 136.4, 131.1, 128.9, 127.3, 125.7, 124.1, 122.6, 117.3, 116.1, 111.3, 107.2, 75.3, 75.0, 45.5, 37.7, 27.7, 26.4, 26.0, 18.1

**LRMS** (CI) Calcd. For C<sub>25</sub>H<sub>28</sub>NO<sub>3</sub> [M+H]<sup>+</sup>: 390, Found: 390

**FTIR** (neat): 3386, 2977, 2928, 2349, 1713, 1601, 1450, 1375, 1165, 1112, 974, 729 cm<sup>-1</sup>

**Mp:** 157.3-157.7 °C

**TLC** (SiO<sub>2</sub>): R<sub>f</sub> = 0.4 (ethyl acetate: hexanes, 1:4)



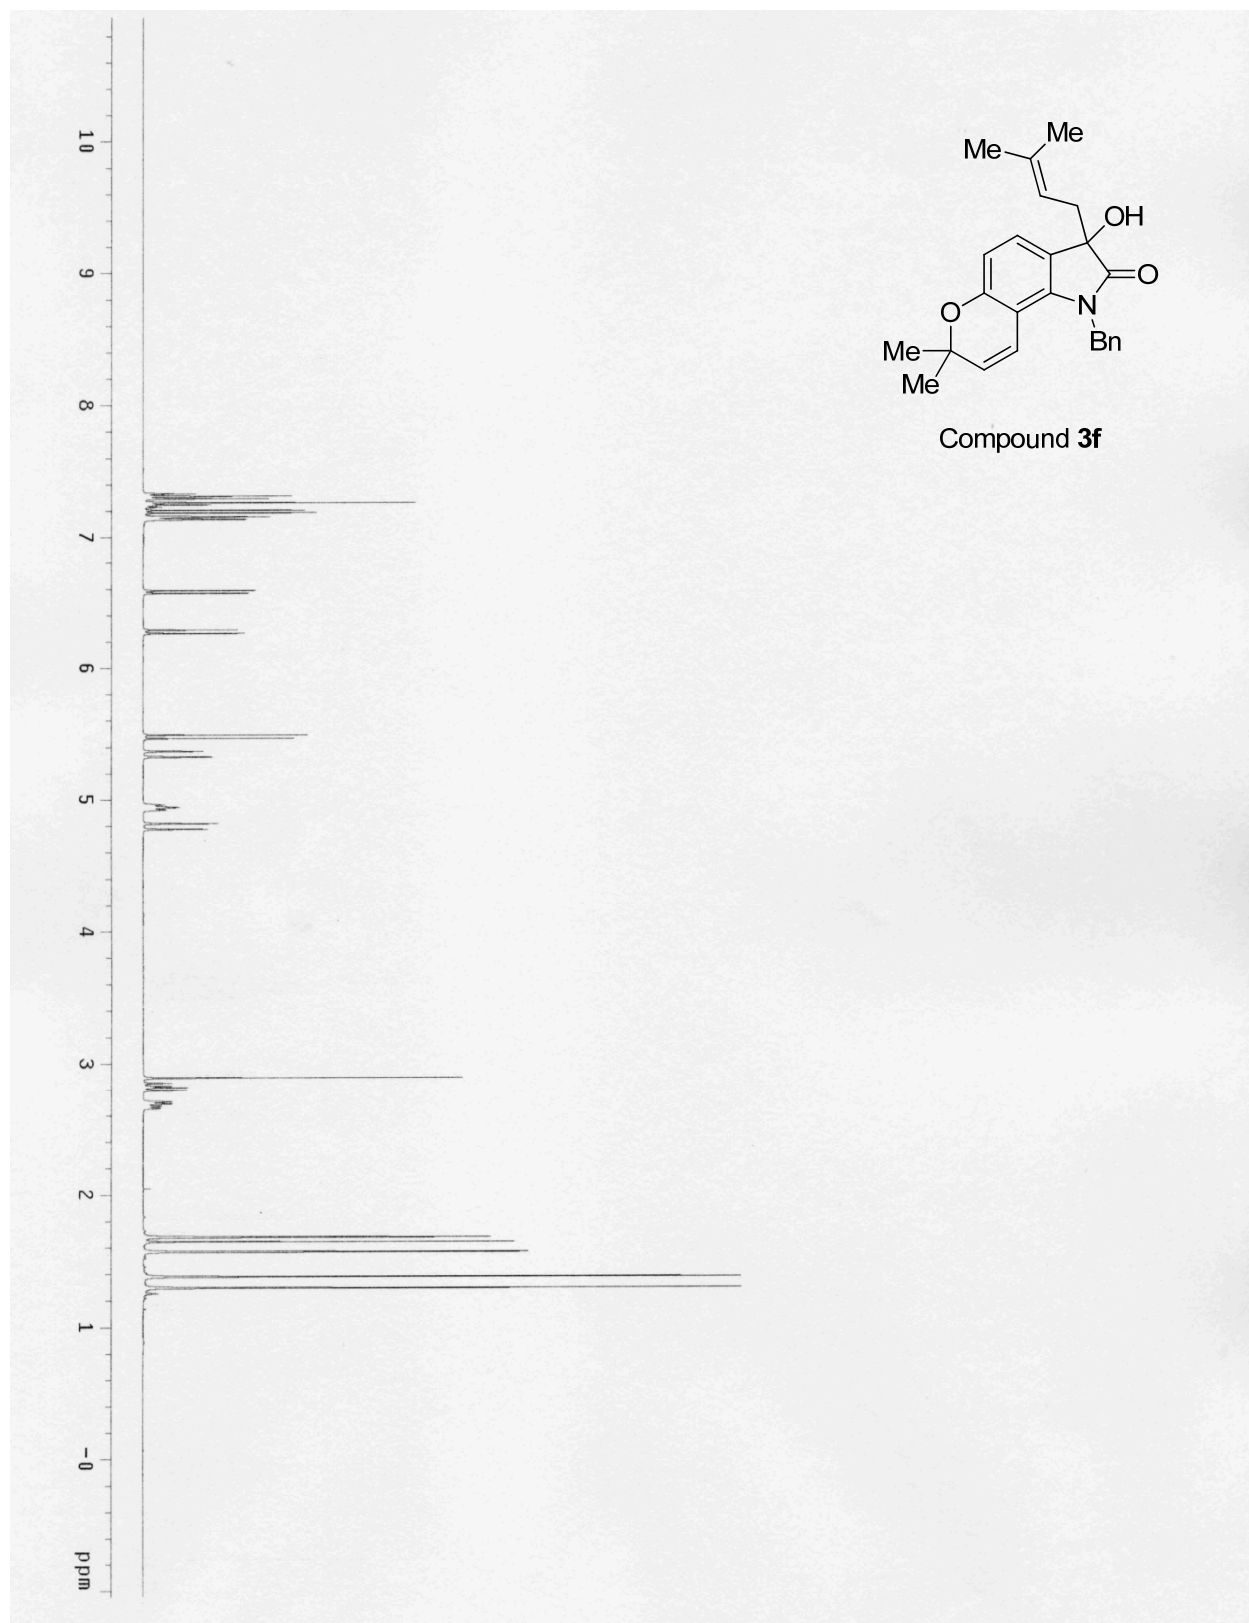

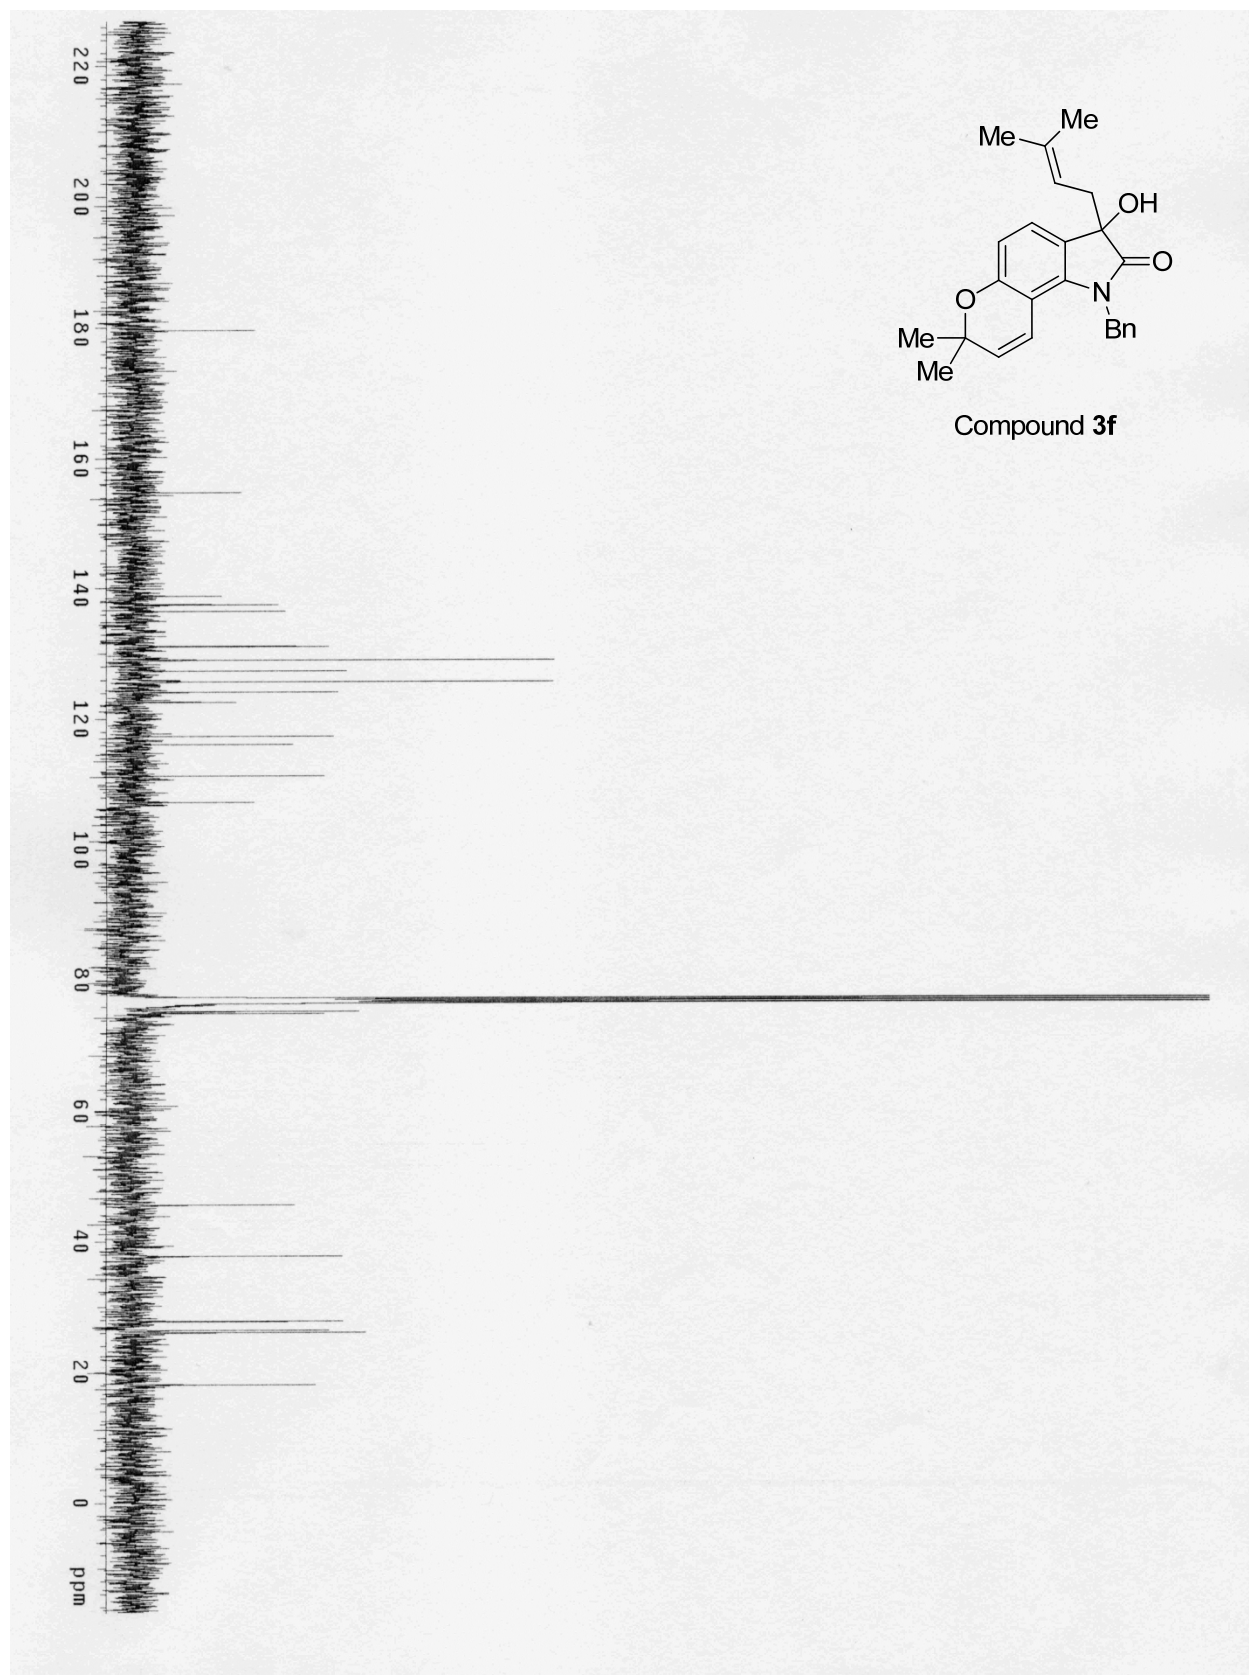

**Experimental Procedures and Spectroscopic Data for Geranylated 3-Hydroxy-2-oxindole 4a-4f**

**(E)-1-benzyl-3-(3,7-dimethylocta-2,6-dien-1-yl)-3-hydroxyindolin-2-one (4a)**

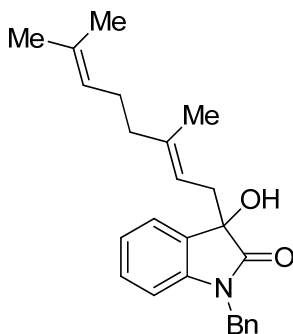

**General Procedure:** The reaction was heated for 48 hours, concentrated *in vacuo* and purified by flash column chromatography (SiO<sub>2</sub>, 15% EtOAc/Hexane) to furnish the title compound (57.0 mg, 76%, >20:1 *E:Z*) as a white solid.

**<sup>1</sup>H NMR** (400 MHz, CDCl<sub>3</sub>): δ 7.40 (dd, *J* = 7.2, 0.8 Hz, 1H), 7.31-7.22 (m, 5H), 7.17 (td, *J* = 7.6, 1.2 Hz, 1H), 7.03 (td, *J* = 7.6, 0.8 Hz, 1H), 6.66 (d, *J* = 7.6 Hz, 1H), 5.04 (d, *J* = 15.6 Hz, 1H), 4.99-4.95 (m, 2H), 4.67 (d, *J* = 16.0 Hz, 1H), 3.46-3.43 (m, 1H), 2.81-2.71 (m, 2H), 1.97-1.87 (m, 4H), 1.64 (s, 3H), 1.55 (s, 3H), 1.53 (s, 3H)

**<sup>13</sup>C NMR** (100 MHz, CDCl<sub>3</sub>): δ 178.3, 143.5, 140.8, 135.5, 131.6, 130.1, 129.4, 128.7, 127.6, 127.1, 124.0, 123.9, 122.9, 115.7, 109.3, 76.3, 43.7, 39.8, 37.4, 26.4, 25.7, 17.6, 16.3

**LRMS** (CI) Calcd. For C<sub>25</sub>H<sub>30</sub>NO<sub>2</sub> [M+H]<sup>+</sup>: 376, Found: 376

**FTIR** (neat): 3329, 2969, 2929, 1738, 1695, 1615, 1494, 1434, 1371, 1284, 1227, 1216, 1113, 1089, 996, 907, 768, 756, 730, 694 cm<sup>-1</sup>

**Mp:** 139.2-139.5 °C

**TLC** (SiO<sub>2</sub>): R<sub>f</sub> = 0.4 (ethyl acetate: hexanes, 1:4)

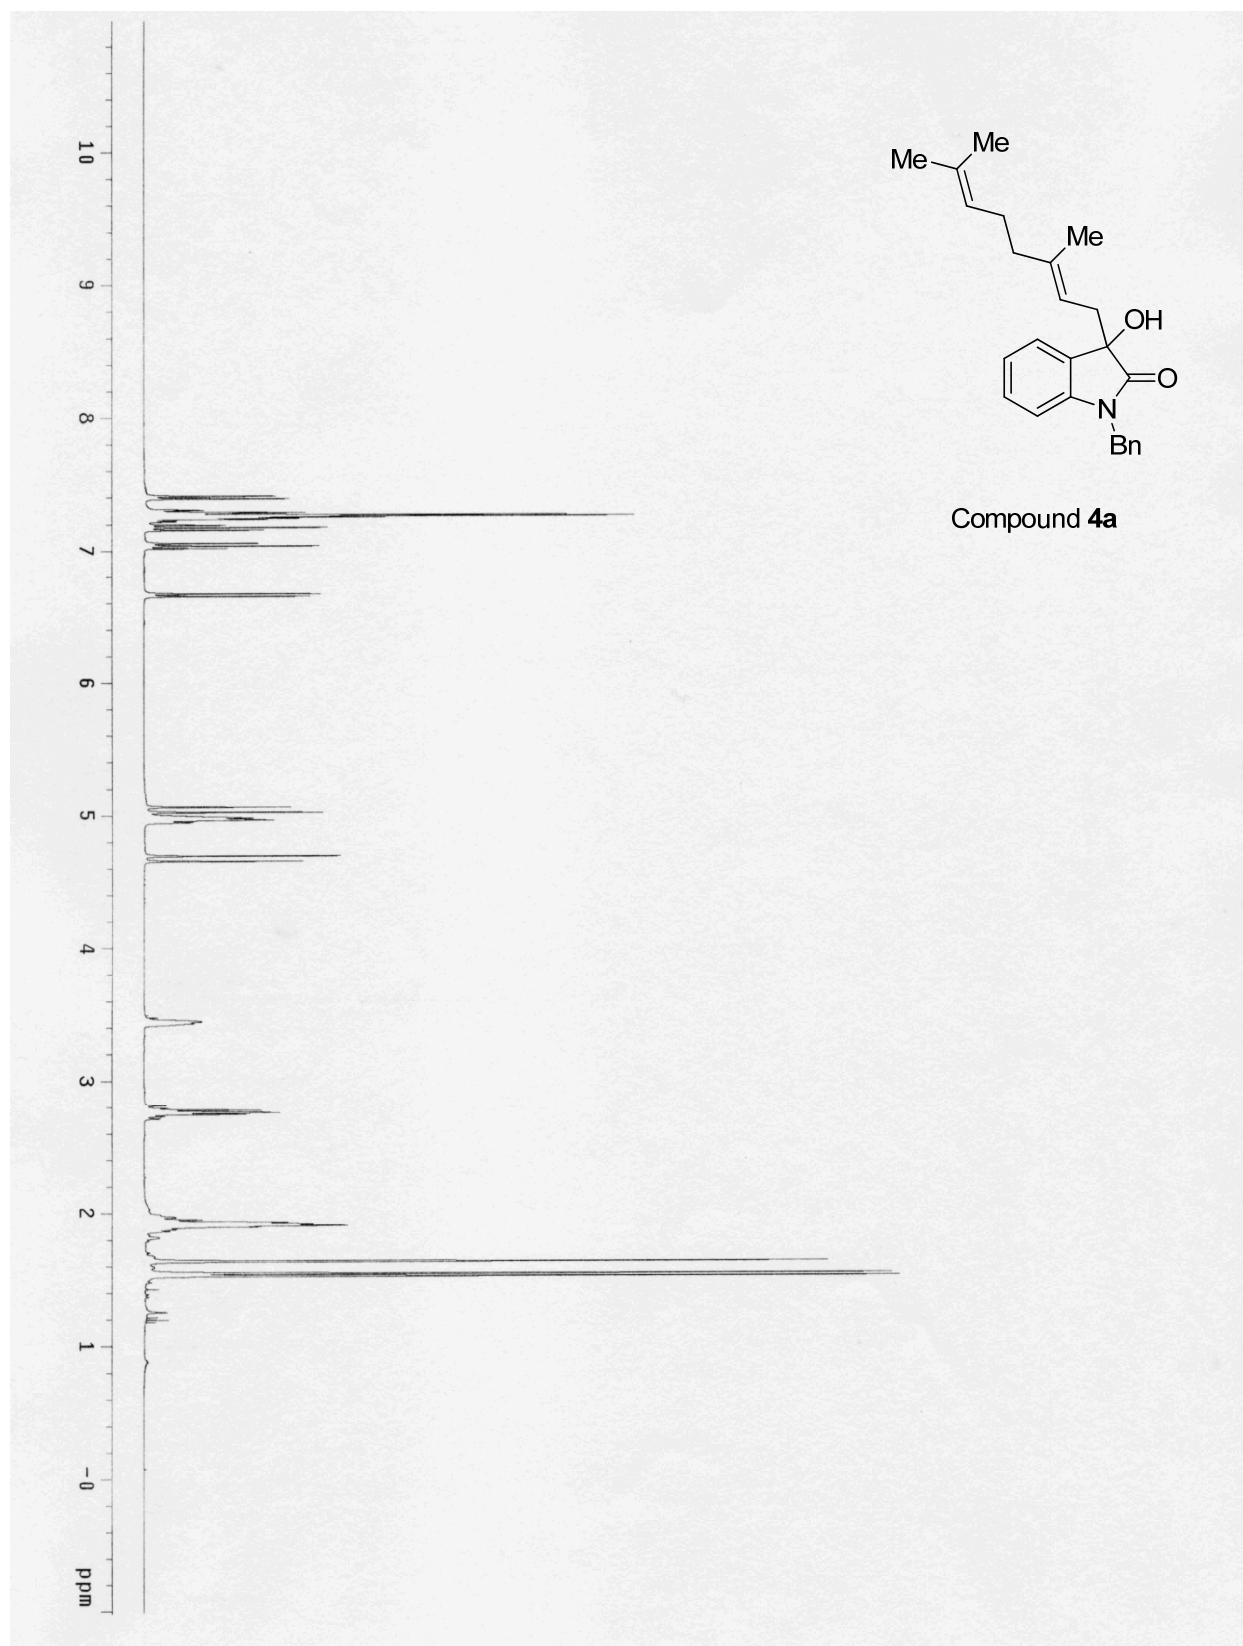

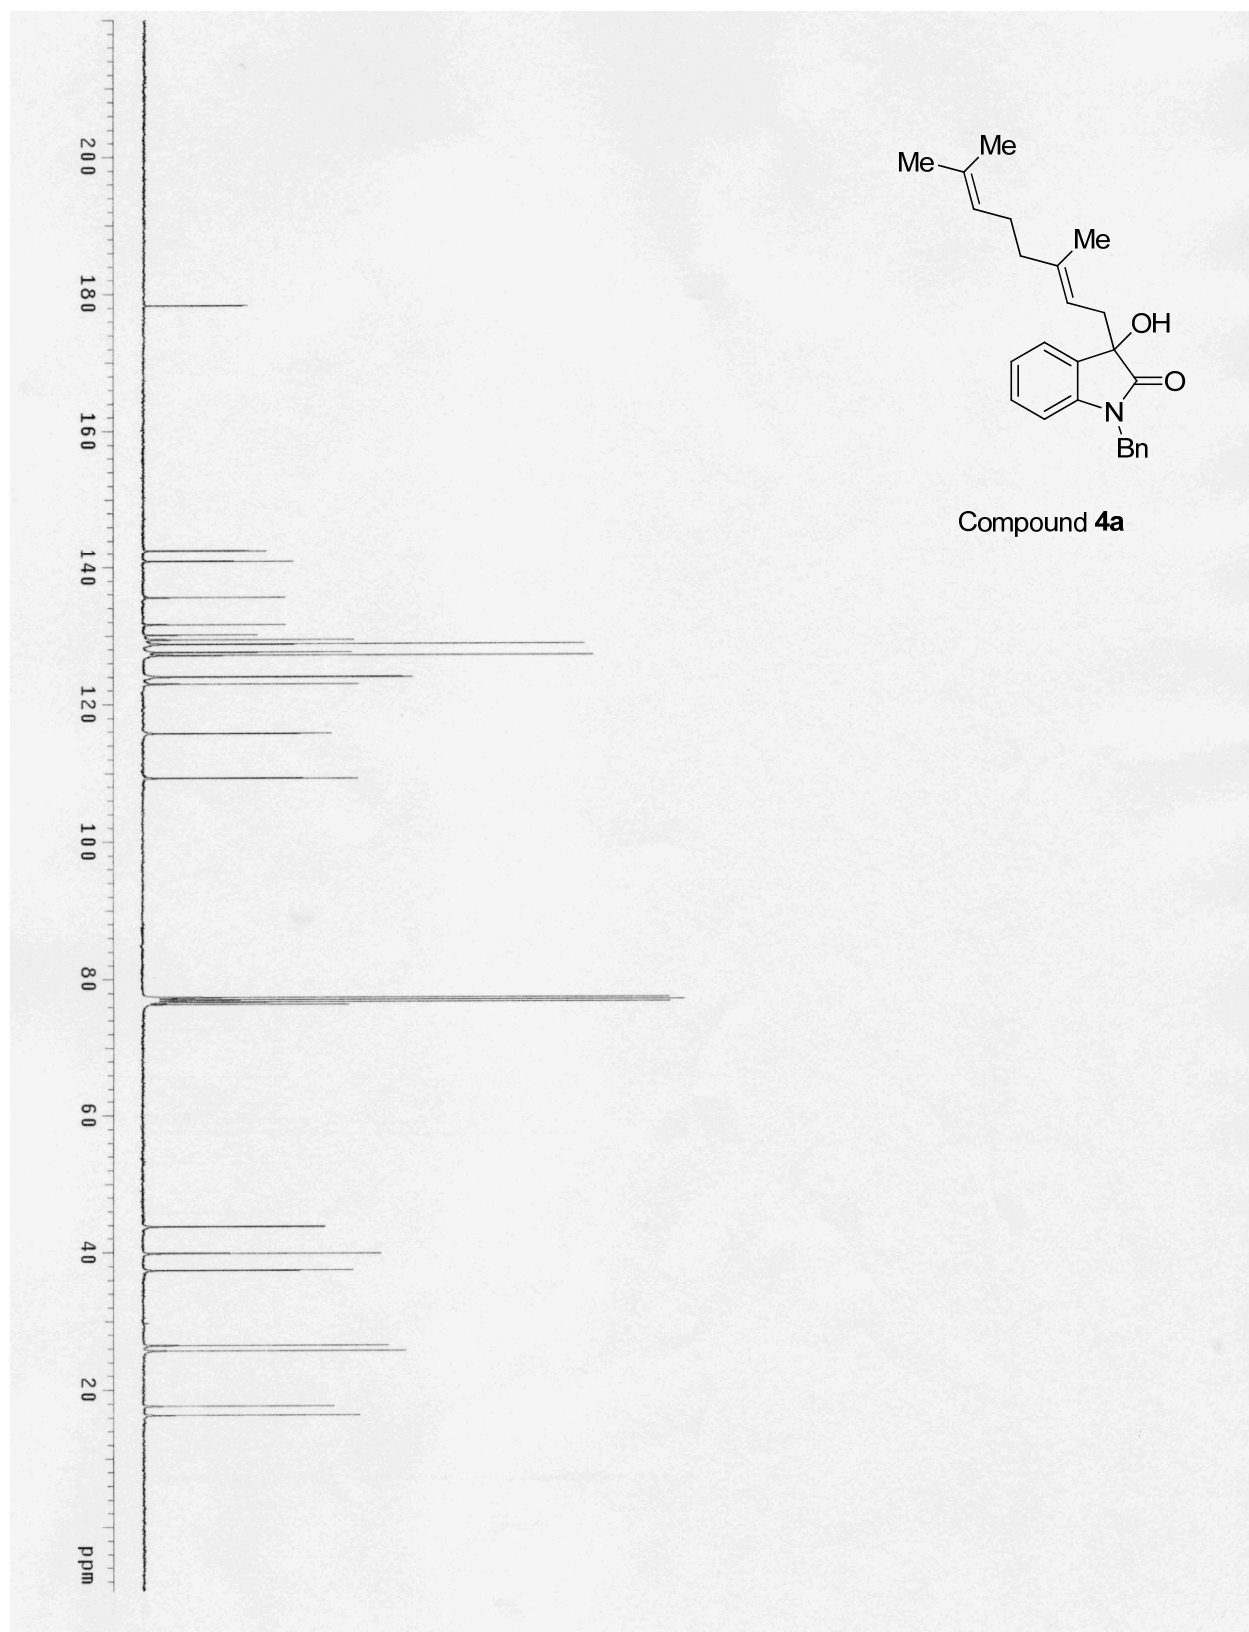

CTY-Myrcene II

File: xp

Pulse Sequence: NOESY1D

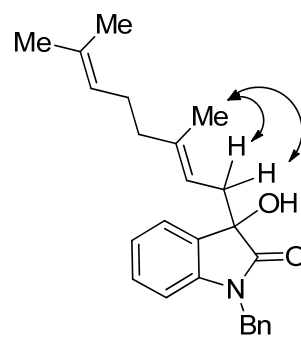

Compound 4a

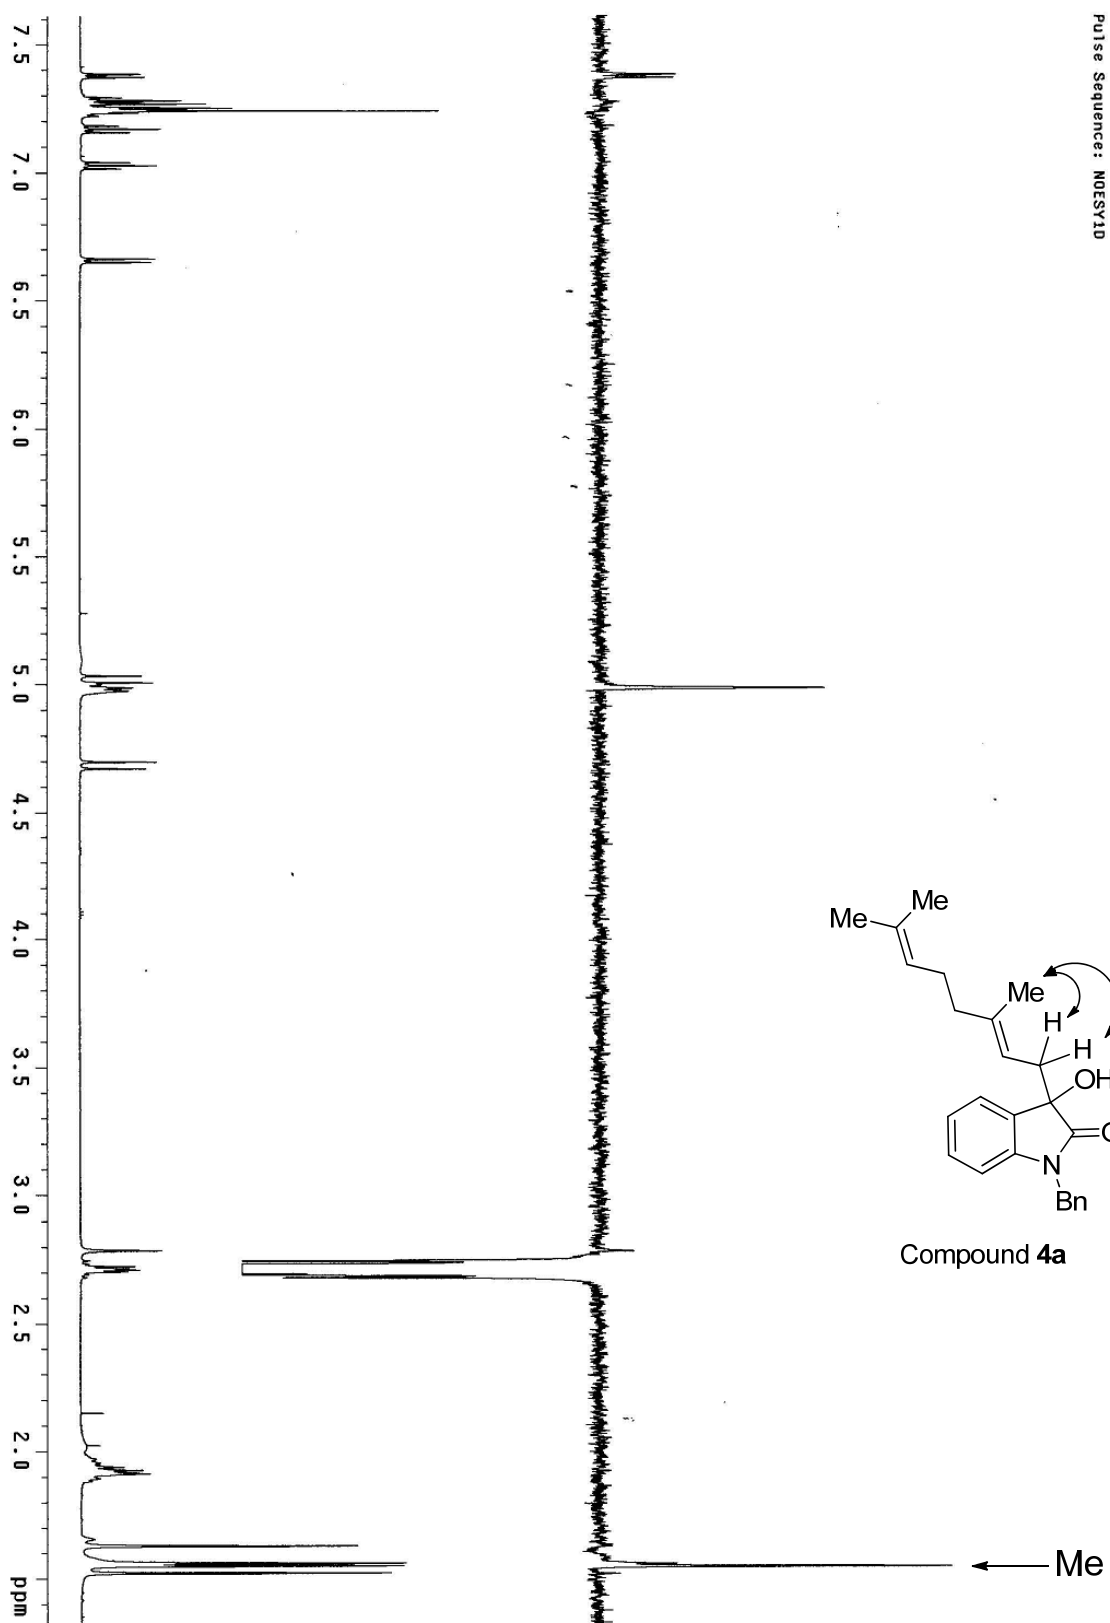

**(E)-1-benzyl-3-(3,7-dimethylocta-2,6-dien-1-yl)-3-hydroxy-5-methylindolin-2-one (4b)**

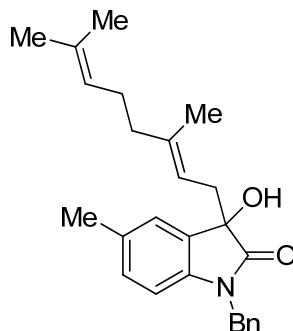

**General Procedure:** The reaction was heated for 48 hours, concentrated *in vacuo* and purified by flash column chromatography (SiO<sub>2</sub>, 15% EtOAc/Hexane) to furnish the title compound (73.2 mg, 94%, >20:1 *E:Z*) as a white solid.

**<sup>1</sup>H NMR** (400 MHz, CDCl<sub>3</sub>): δ 7.31-7.21 (m, 6H), 6.99-6.97 (m, 1H), 6.55 (d, *J* = 7.6 Hz, 1H), 5.03-4.99 (m, 3H), 4.68 (d, *J* = 15.6 Hz, 1H), 2.78 (s, 1H), 2.75 (dd, *J* = 13.6, 8.4 Hz, 1H), 2.68 (dd, *J* = 14.0, 6.8 Hz, 1H), 2.30 (s, 3H), 1.97-1.94 (m, 4H), 1.65 (s, 3H), 1.58 (s, 3H), 1.55 (s, 3H)

**<sup>13</sup>C NMR** (100 MHz, CDCl<sub>3</sub>): δ 178.1, 140.9, 140.1, 135.6, 132.5, 131.6, 129.9, 129.6, 128.7, 127.5, 127.1, 124.7, 123.9, 115.8, 109.0, 76.3, 43.7, 39.9, 37.4, 26.5, 25.7, 21.0, 17.6, 16.3

**LRMS** (CI) Calcd. For C<sub>26</sub>H<sub>32</sub>NO<sub>2</sub> [M+H]<sup>+</sup>: 390, Found: 390

**FTIR** (neat): 3319, 2927, 2362, 1694, 1619, 1494, 1432, 1347, 1276, 1192, 1147, 1085, 978, 809, 742, 693 cm<sup>-1</sup>

**Mp:** 142.3-142.9 °C

**TLC** (SiO<sub>2</sub>): R<sub>f</sub> = 0.4 (ethyl acetate: hexanes, 1:4)

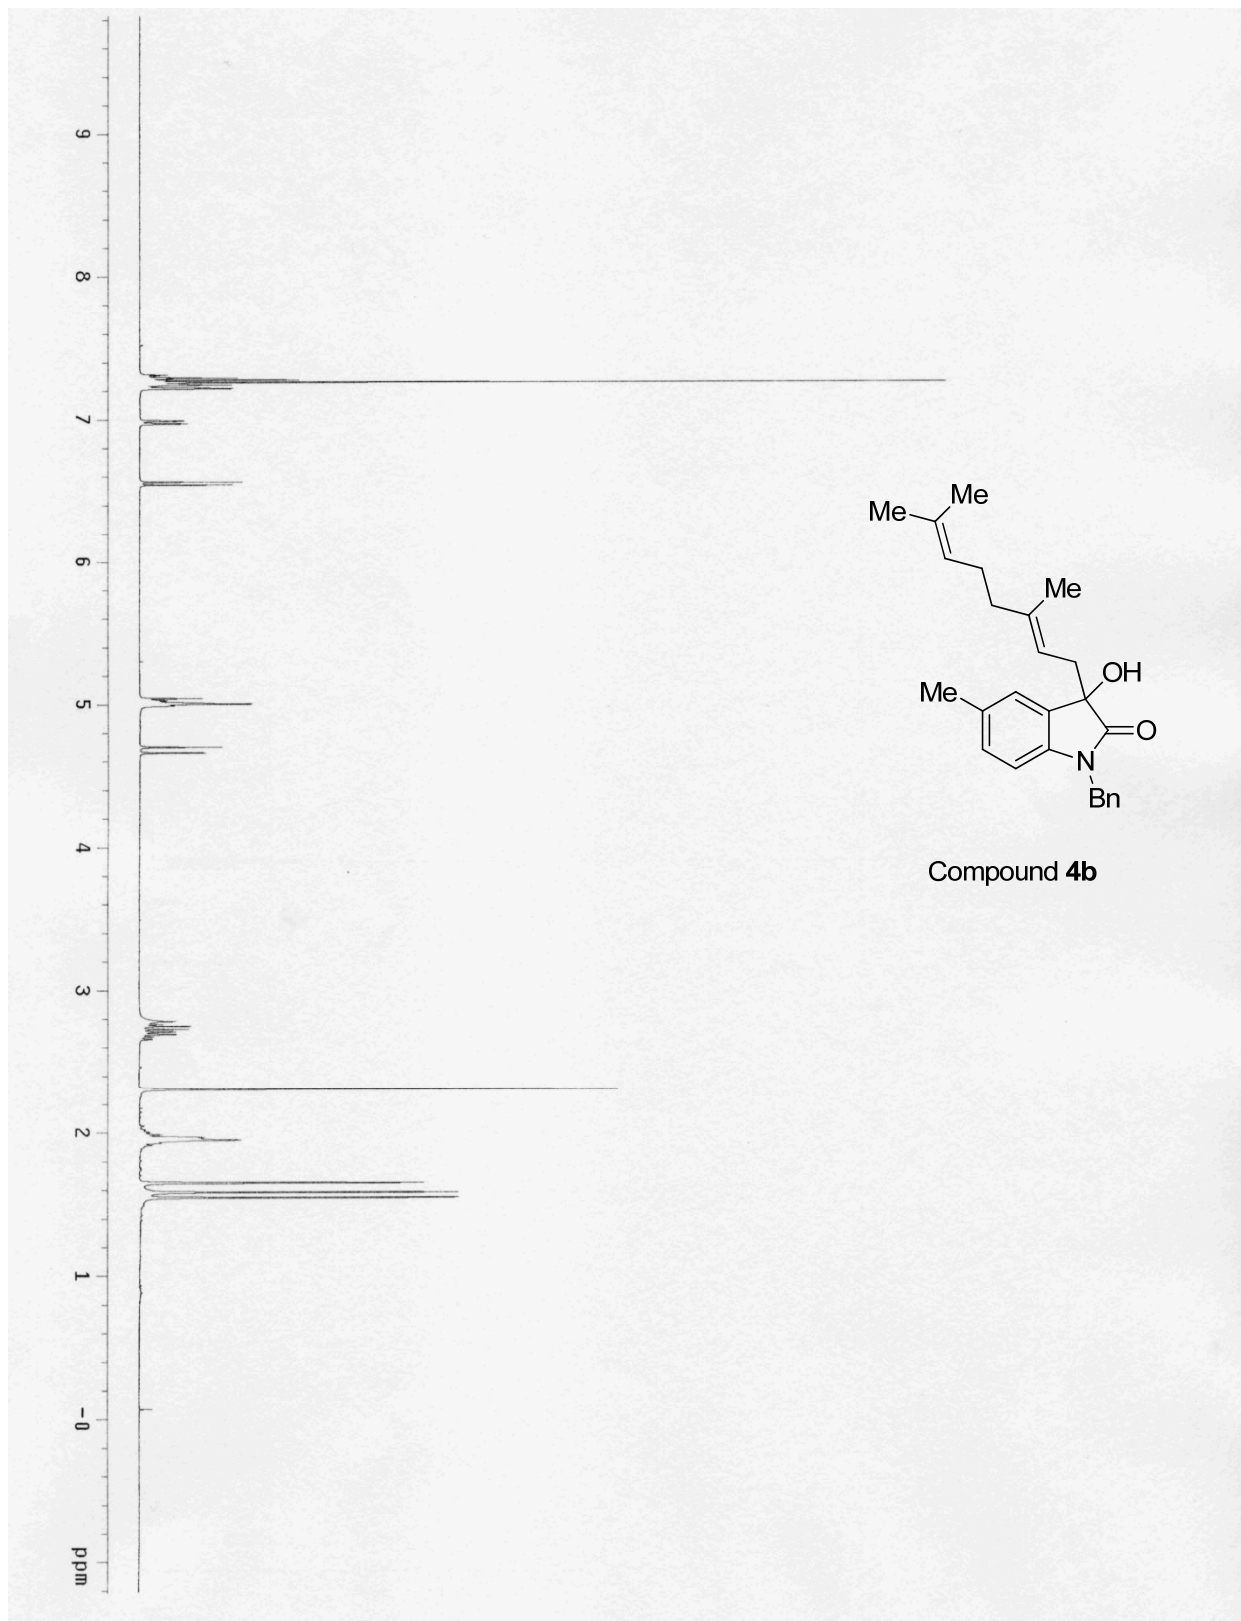



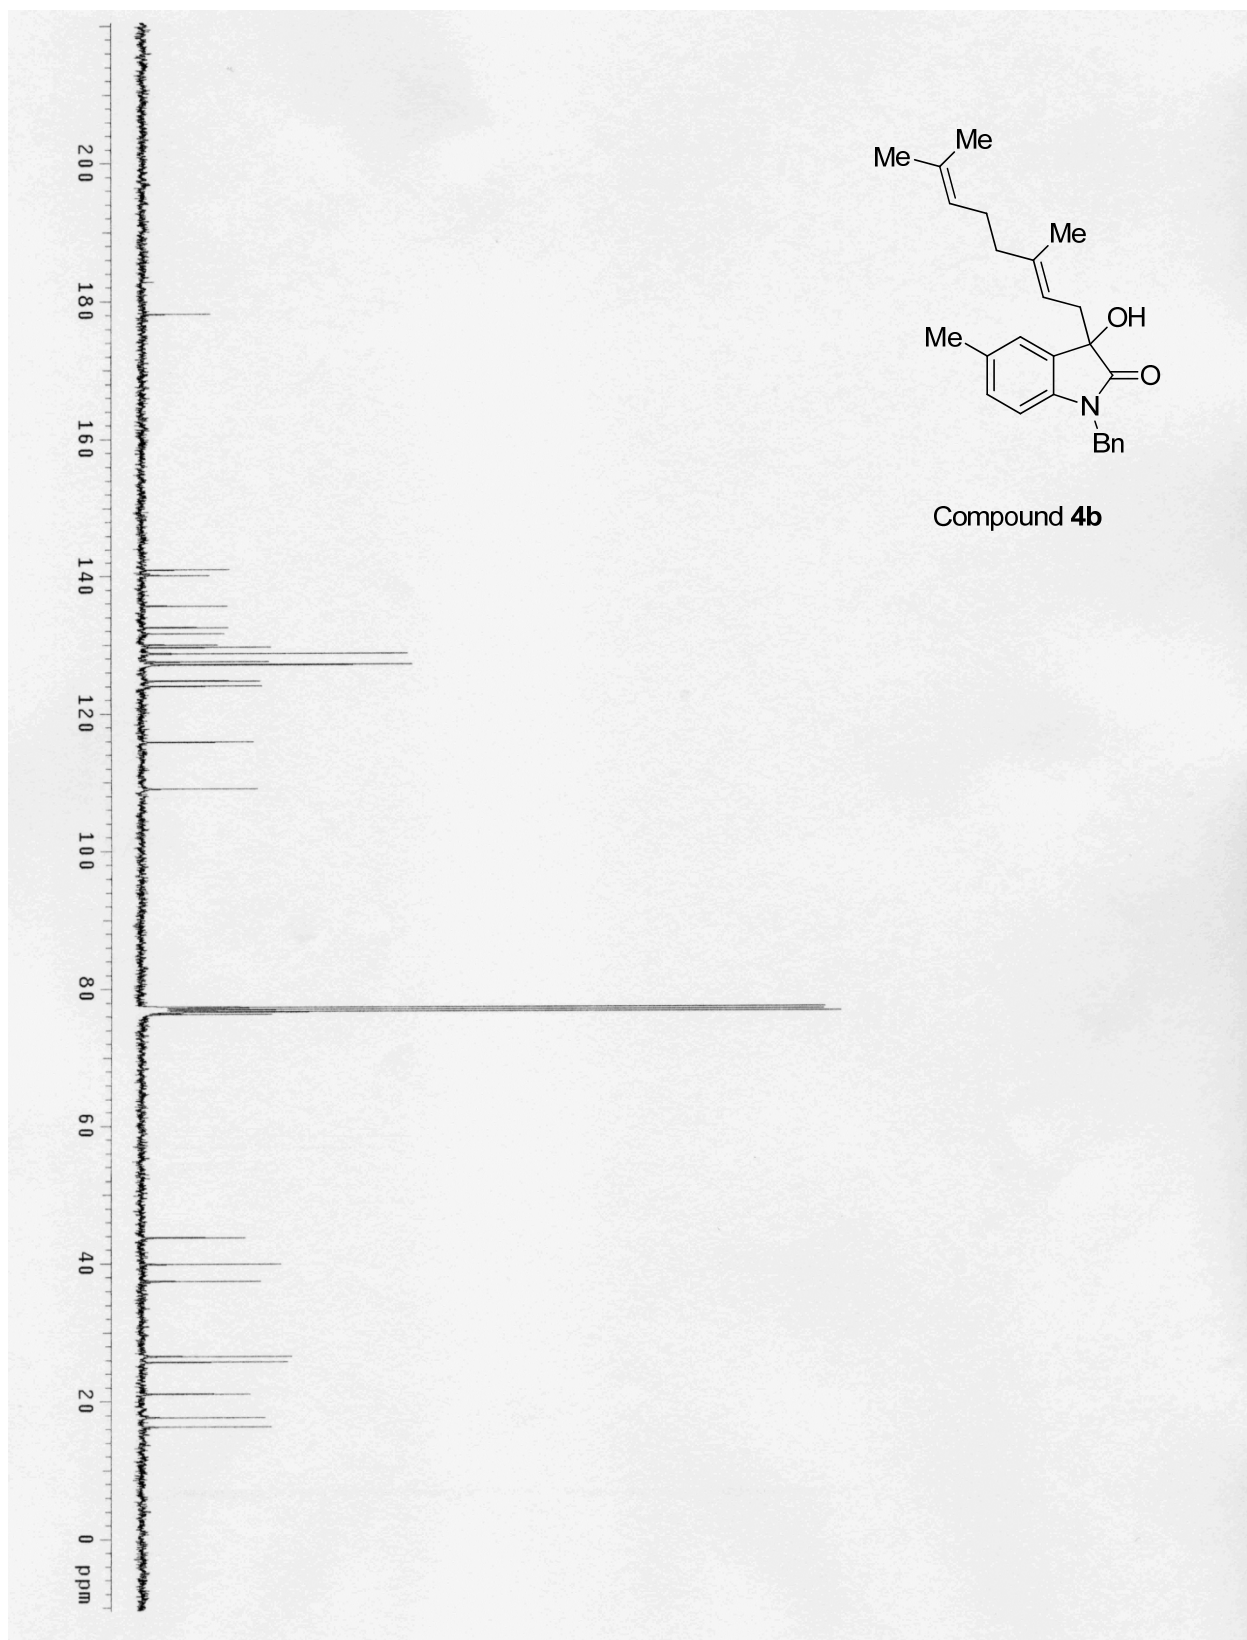

**(E)-1-benzyl-3-(3,7-dimethylocta-2,6-dien-1-yl)-3-hydroxy-5-methoxyindolin-2-one (4c)**

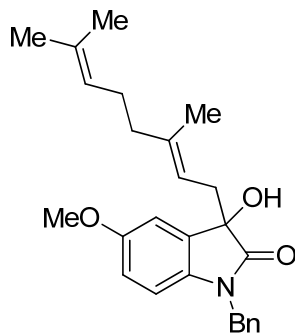

**General Procedure:** The reaction was heated for 48 hours, concentrated *in vacuo* and purified by flash column chromatography (SiO<sub>2</sub>, 15% EtOAc/Hexane) to furnish the title compound (78.5 mg, 97%, >20:1 *E:Z*) as a white solid.

**<sup>1</sup>H NMR** (400 MHz, CDCl<sub>3</sub>): δ 7.31-7.24 (m, 5H), 7.02 (d, *J* = 2.4 Hz, 1H), 6.71 (dd, *J* = 8.4, 2.4 Hz, 1H), 6.56 (d, *J* = 8.4 Hz, 1H), 5.04-4.97 (m, 3H), 4.67 (d, *J* = 15.6 Hz, 1H), 3.76 (s, 3H), 3.01 (s, 1H), 2.79-2.67 (m, 2H), 2.01-1.94 (m, 4H), 1.65 (s, 3H), 1.58 (s, 3H), 1.54 (s, 3H)

**<sup>13</sup>C NMR** (100 MHz, CDCl<sub>3</sub>): δ 177.9, 156.2, 140.9, 135.8, 135.6, 131.7, 131.3, 128.8, 127.6, 127.1, 123.9, 115.7, 114.1, 111.0, 109.8, 76.6, 55.8, 43.9, 39.9, 37.5, 26.5, 25.7, 17.7, 16.4

**LRMS** (CI) Calcd. For C<sub>26</sub>H<sub>32</sub>NO<sub>3</sub> [M+H]<sup>+</sup>: 406, Found: 406

**FTIR** (neat): 3385, 2918, 1964, 1601, 1432, 1347, 1276, 1174, 1022, 809, 698 cm<sup>-1</sup>

**Mp:** 135.7-136.1 °C

**TLC** (SiO<sub>2</sub>): R<sub>f</sub> = 0.4 (ethyl acetate: hexanes, 1:4)

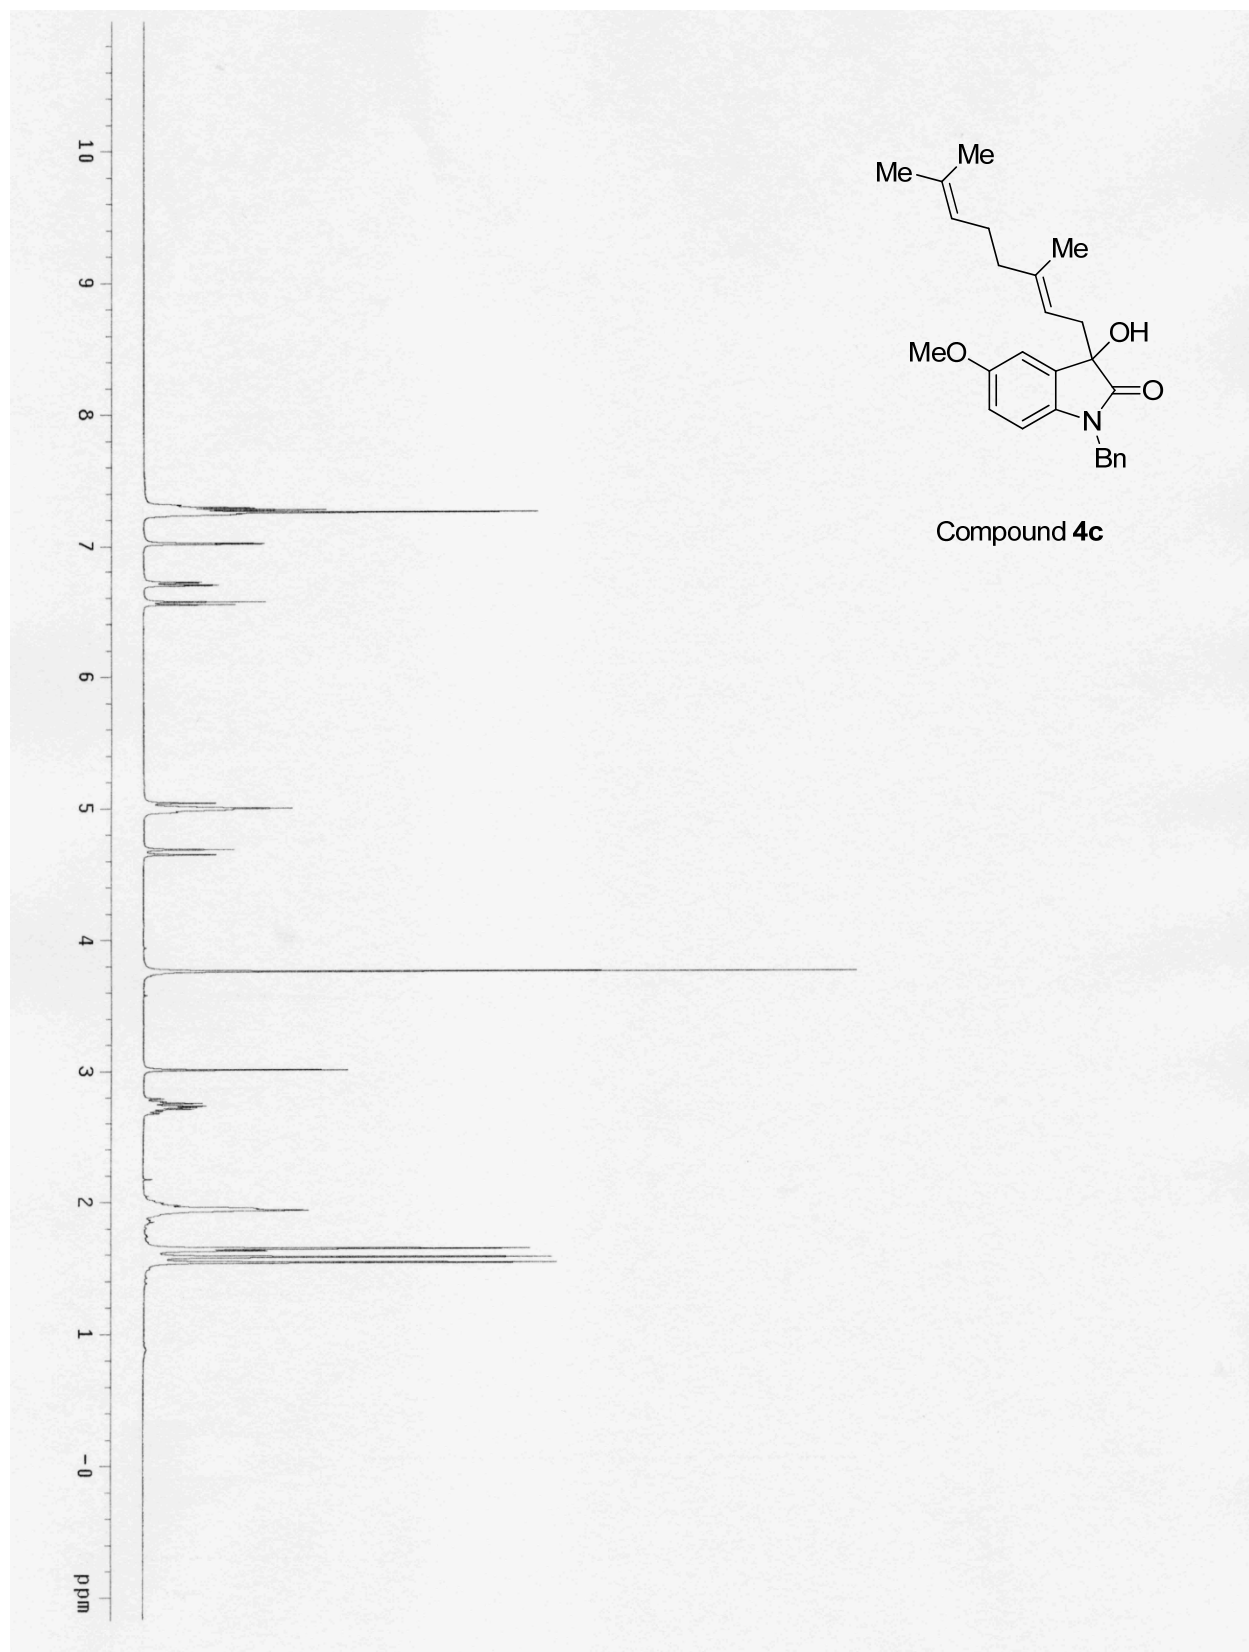

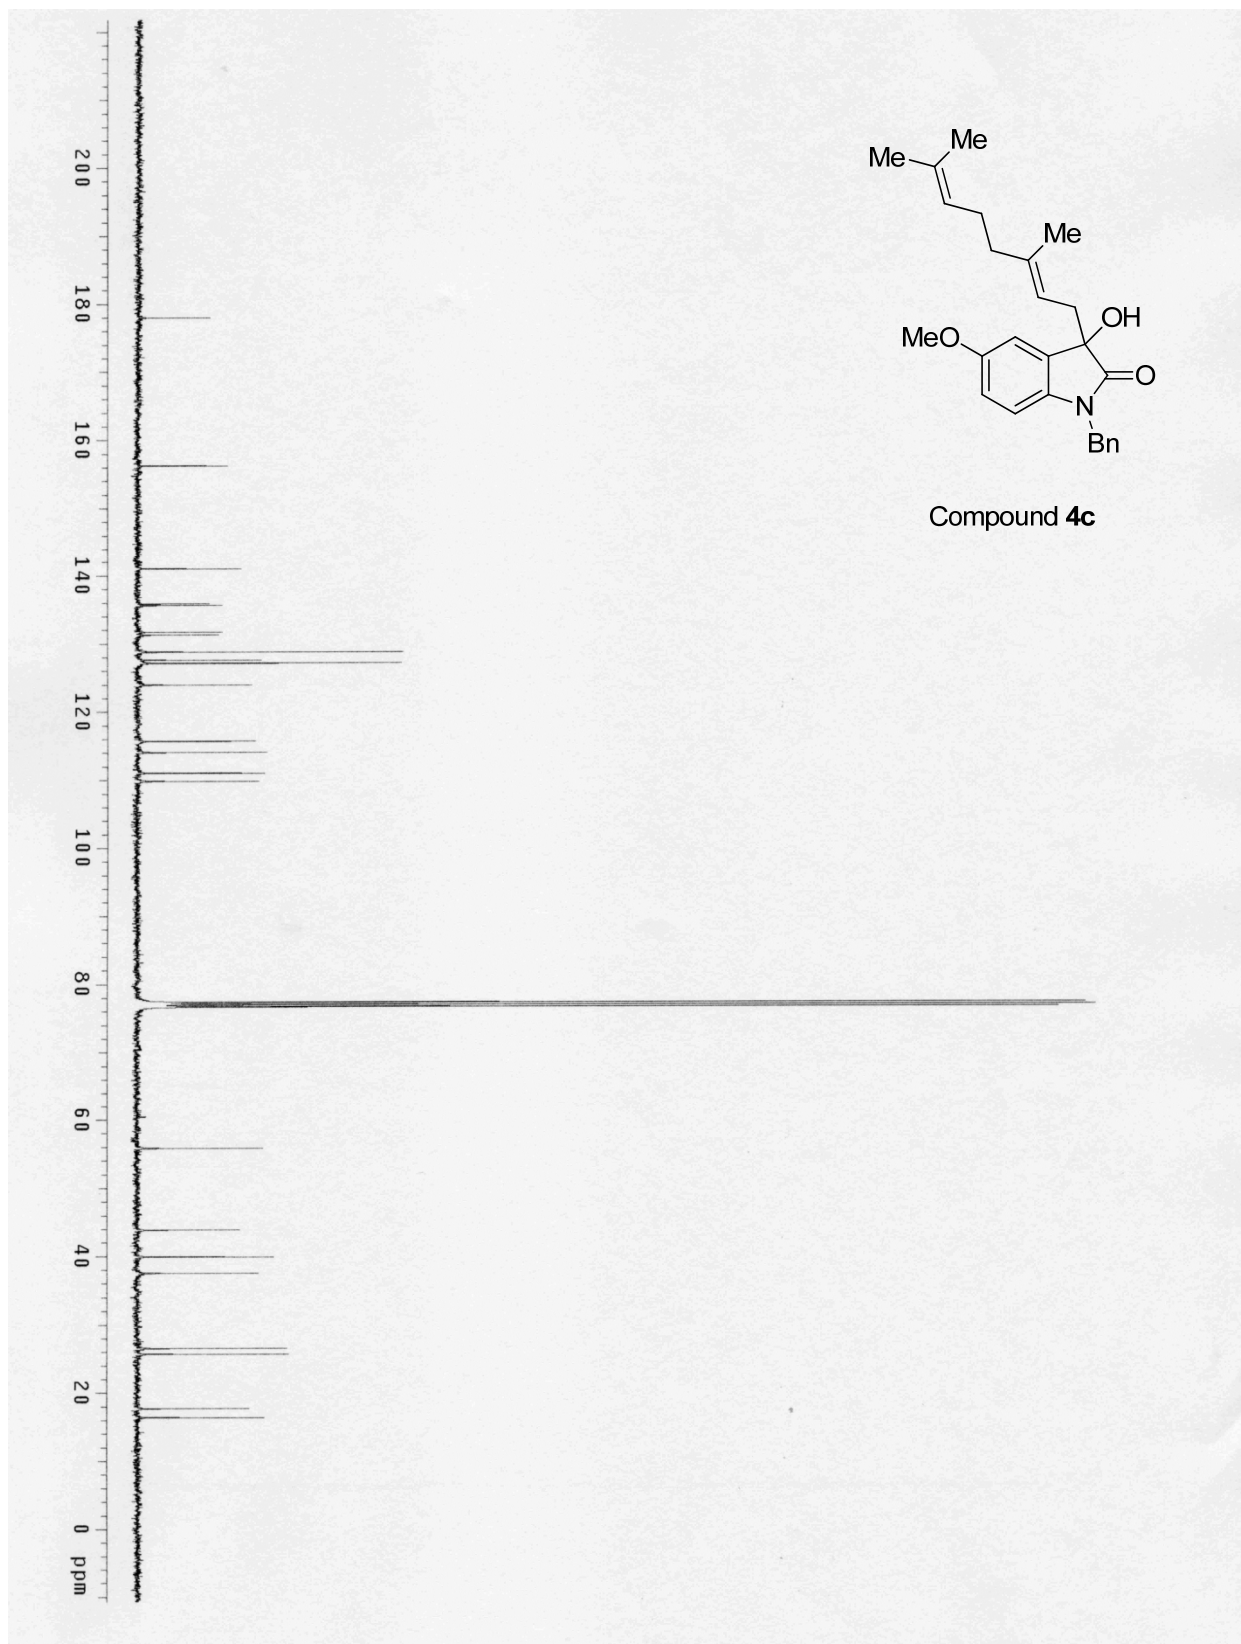

**(E)-1-benzyl-6-chloro-3-(3,7-dimethylocta-2,6-dien-1-yl)-3-hydroxyindolin-2-one (4d)**

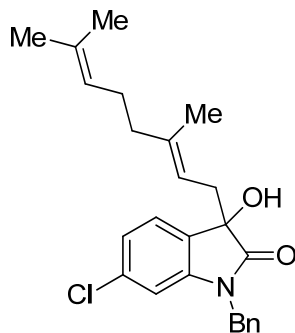

**General Procedure:** The reaction was heated for 48 hours, concentrated *in vacuo* and purified by flash column chromatography (SiO<sub>2</sub>, 15% EtOAc/Hexane) to furnish the title compound (68.1 mg, 83%, >20:1 *E:Z*) as a white solid.

**<sup>1</sup>H NMR** (400 MHz, CDCl<sub>3</sub>): δ 7.35-7.24 (m, 6H), 7.02 (dd, *J* = 8.0, 2.0 Hz, 1H), 6.66 (d, *J* = 2.0 Hz, 1H), 5.04-4.96 (m, 3H), 4.66 (d, *J* = 15.6 Hz, 1H), 2.84 (s, 1H), 2.76-2.66 (m, 2H), 2.04-1.91 (m, 4H), 1.65 (s, 3H), 1.57 (s, 3H), 1.55 (s, 3H)

**<sup>13</sup>C NMR** (100 MHz, CDCl<sub>3</sub>): δ 177.9, 143.8, 141.5, 135.2, 134.9, 131.8, 128.9, 128.3, 127.8, 127.1, 124.9, 123.8, 122.8, 115.3, 109.9, 75.8, 43.9, 39.9, 37.4, 26.4, 25.7, 17.7, 16.3

**LRMS** (CI) Calcd. For C<sub>25</sub>H<sub>29</sub>ClNO<sub>2</sub> [M+H]<sup>+</sup>: 410, Found: 410

**FTIR** (neat): 3372, 2914, 1708, 1605, 1490, 1441, 1374, 1103, 1067, 991, 844, 693 cm<sup>-1</sup>

**Mp:** 134.8-135.1 °C

**TLC** (SiO<sub>2</sub>): R<sub>f</sub> = 0.4 (ethyl acetate: hexanes, 1:4)

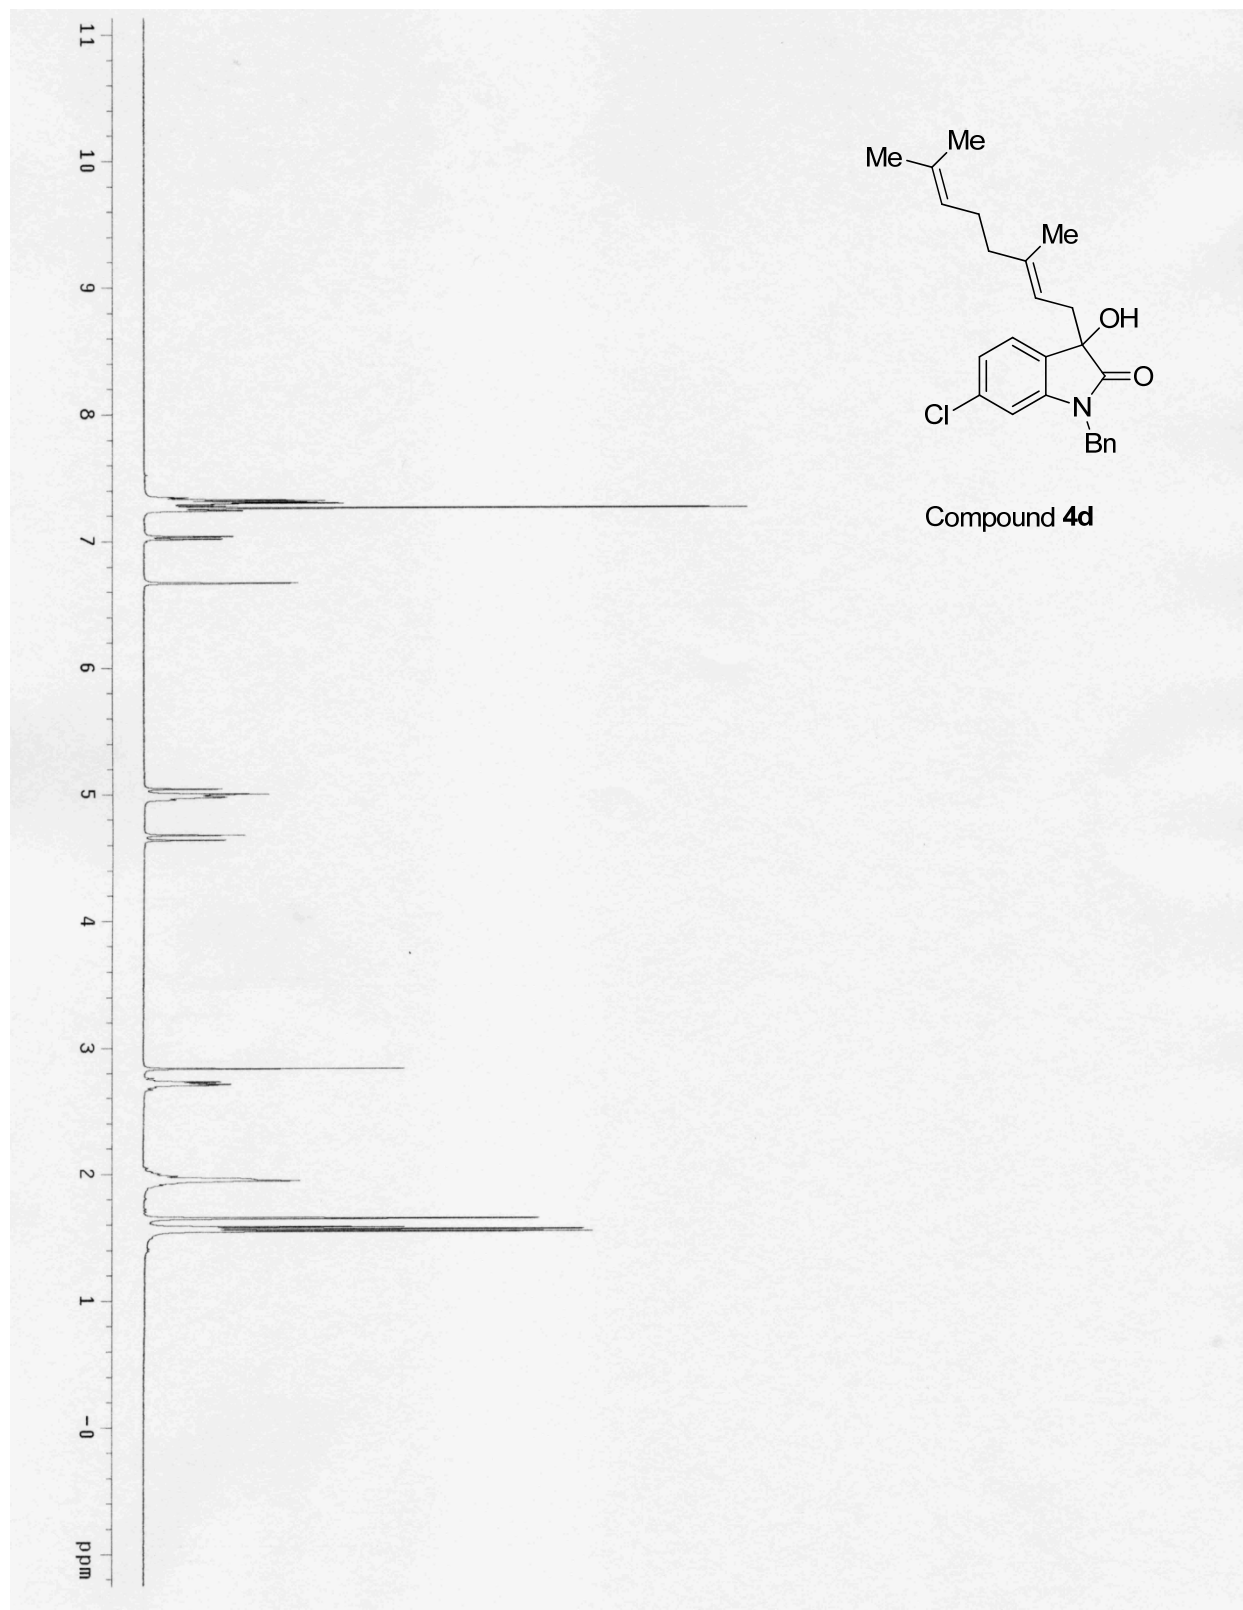

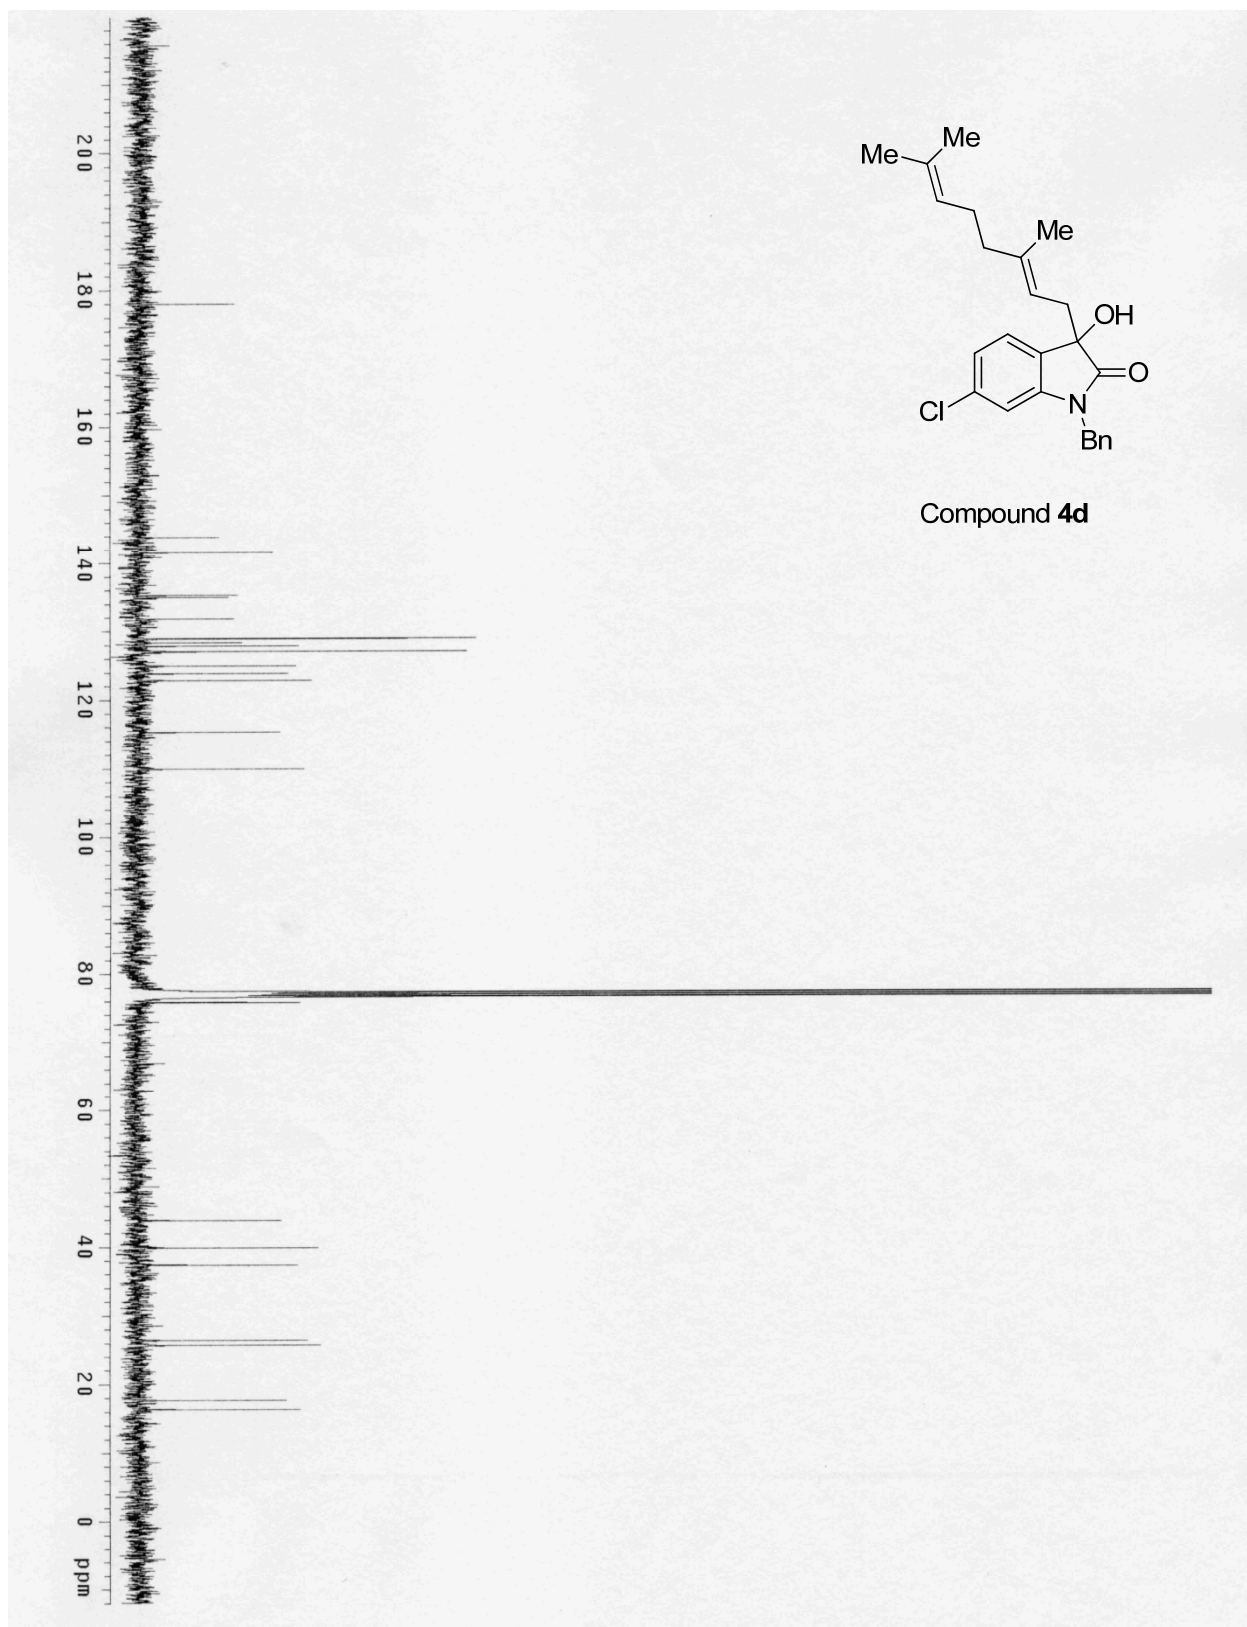

**(E)-1-benzyl-3-(3,7-dimethylocta-2,6-dien-1-yl)-7-fluoro-3-hydroxyindolin-2-one (4e)**

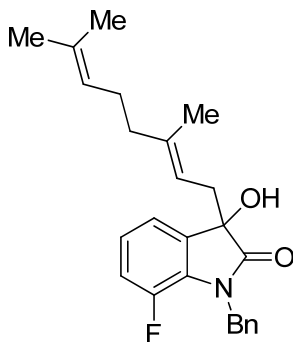

**General Procedure:** The reaction was heated for 48 hours, concentrated *in vacuo* and purified by flash column chromatography (SiO<sub>2</sub>, 15% EtOAc/Hexane) to furnish the title compound (69.0 mg, 88%, >20:1 *E:Z*) as a white solid.

**<sup>1</sup>H NMR** (400 MHz, CDCl<sub>3</sub>): δ 7.32-7.18 (m, 6H), 7.03-6.95 (m, 2H), 5.08 (d, *J* = 15.2 Hz, 1H), 4.99-4.92 (m, 3H), 2.79 (s, 1H), 2.75-2.65 (m, 2H), 1.99-1.87 (m, 4H), 1.65 (s, 3H), 1.57 (s, 3H), 1.55 (s, 3H)

**<sup>13</sup>C NMR** (100 MHz, CDCl<sub>3</sub>): δ 177.8, 147.4 (d, *J* = 243.3 Hz), 141.5, 136.7, 132.9, 131.7, 129.0 (d, *J* = 9.0 Hz), 128.6, 127.6, 127.4 (d, *J* = 8.2 Hz), 123.9, 123.7 (d, *J* = 5.9 Hz), 119.9, 117.7 (d, *J* = 19.3 Hz), 115.2, 76.2 (d, *J* = 2.2 Hz), 45.3 (d, *J* = 4.5 Hz), 39.8, 37.6, 26.4, 25.7, 17.7, 16.3

**<sup>19</sup>F NMR** (376 MHz, CDCl<sub>3</sub>): δ -133.5– -133.6 (m)

**LRMS** (CI) Calcd. For C<sub>25</sub>H<sub>29</sub>FNO<sub>2</sub> [M+H]<sup>+</sup>: 394, Found: 394

**FTIR** (neat): 3359, 2918, 2375, 2335, 1726, 1628, 1481, 1352, 1245, 1178, 1080, 778, 729, 693 cm<sup>-1</sup>

**Mp:** 85.1-85.4 °C

**TLC** (SiO<sub>2</sub>): R<sub>f</sub> = 0.4 (ethyl acetate: hexanes, 1:4)



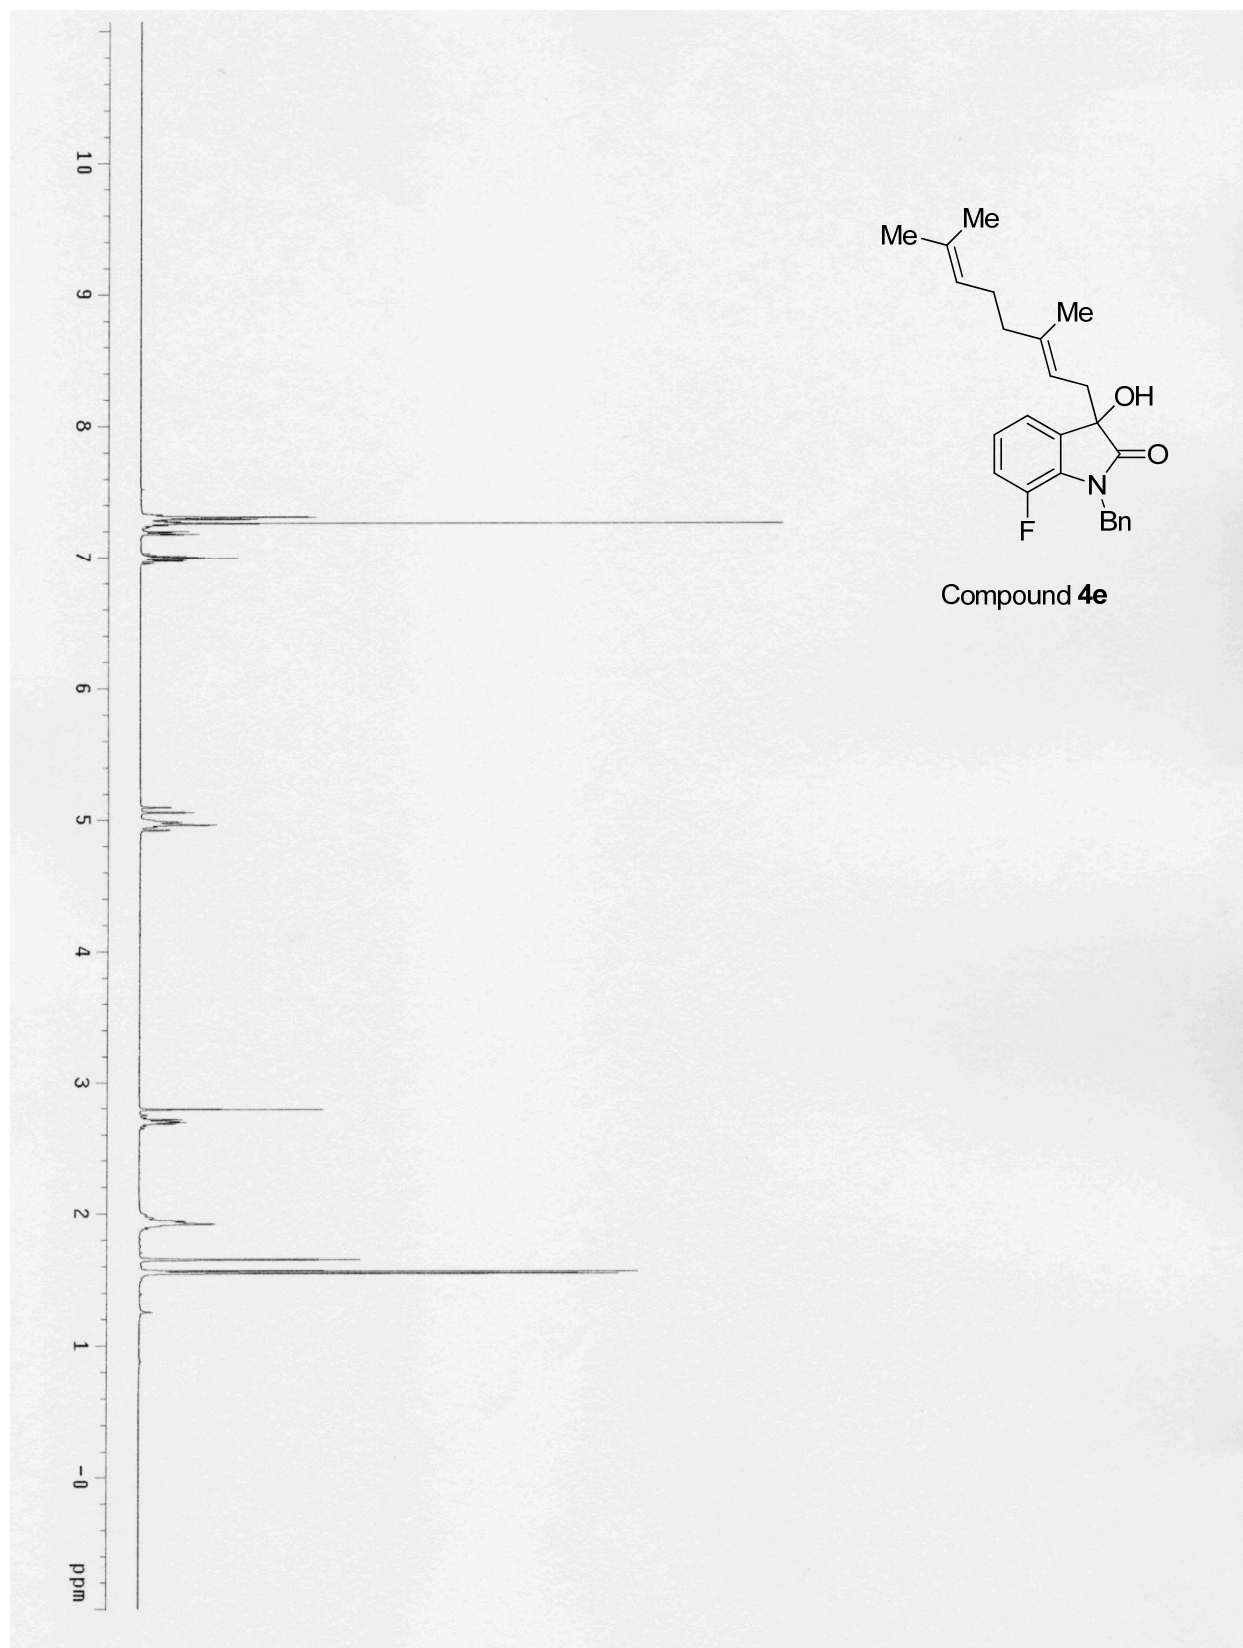

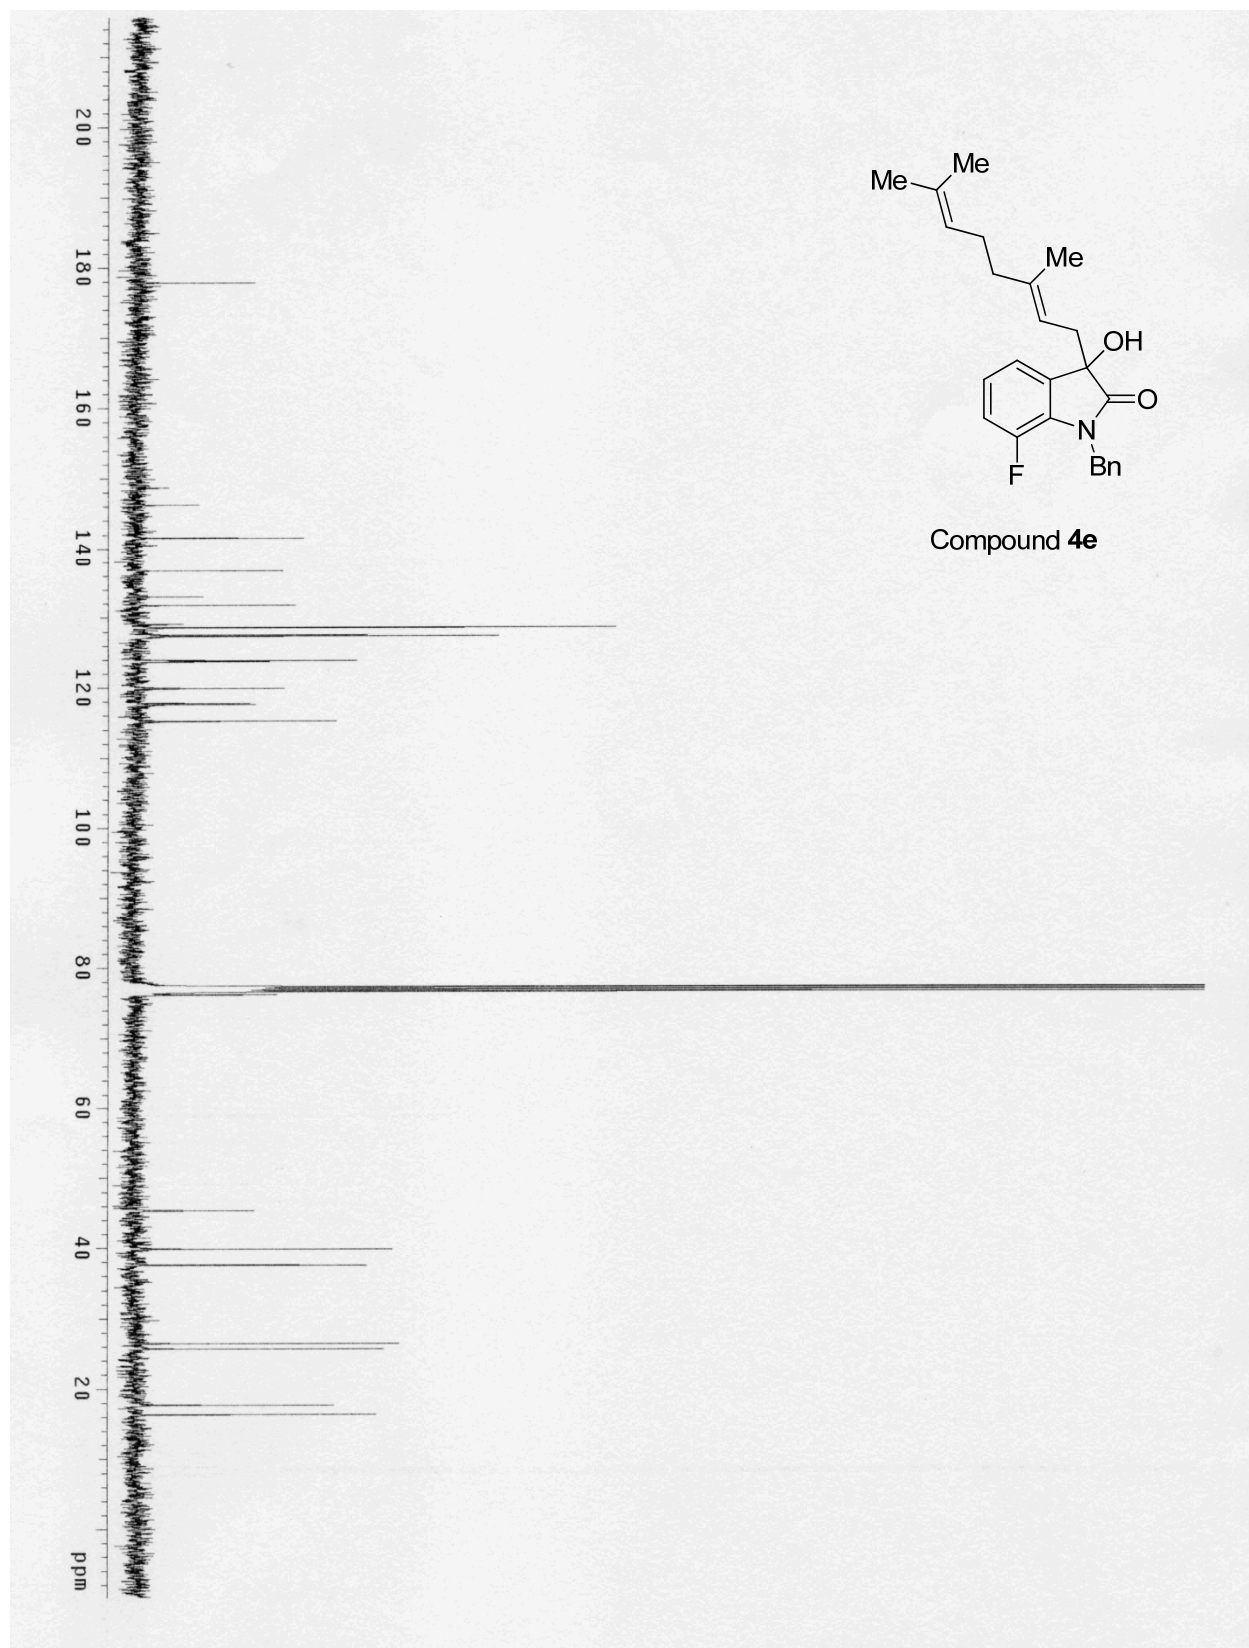

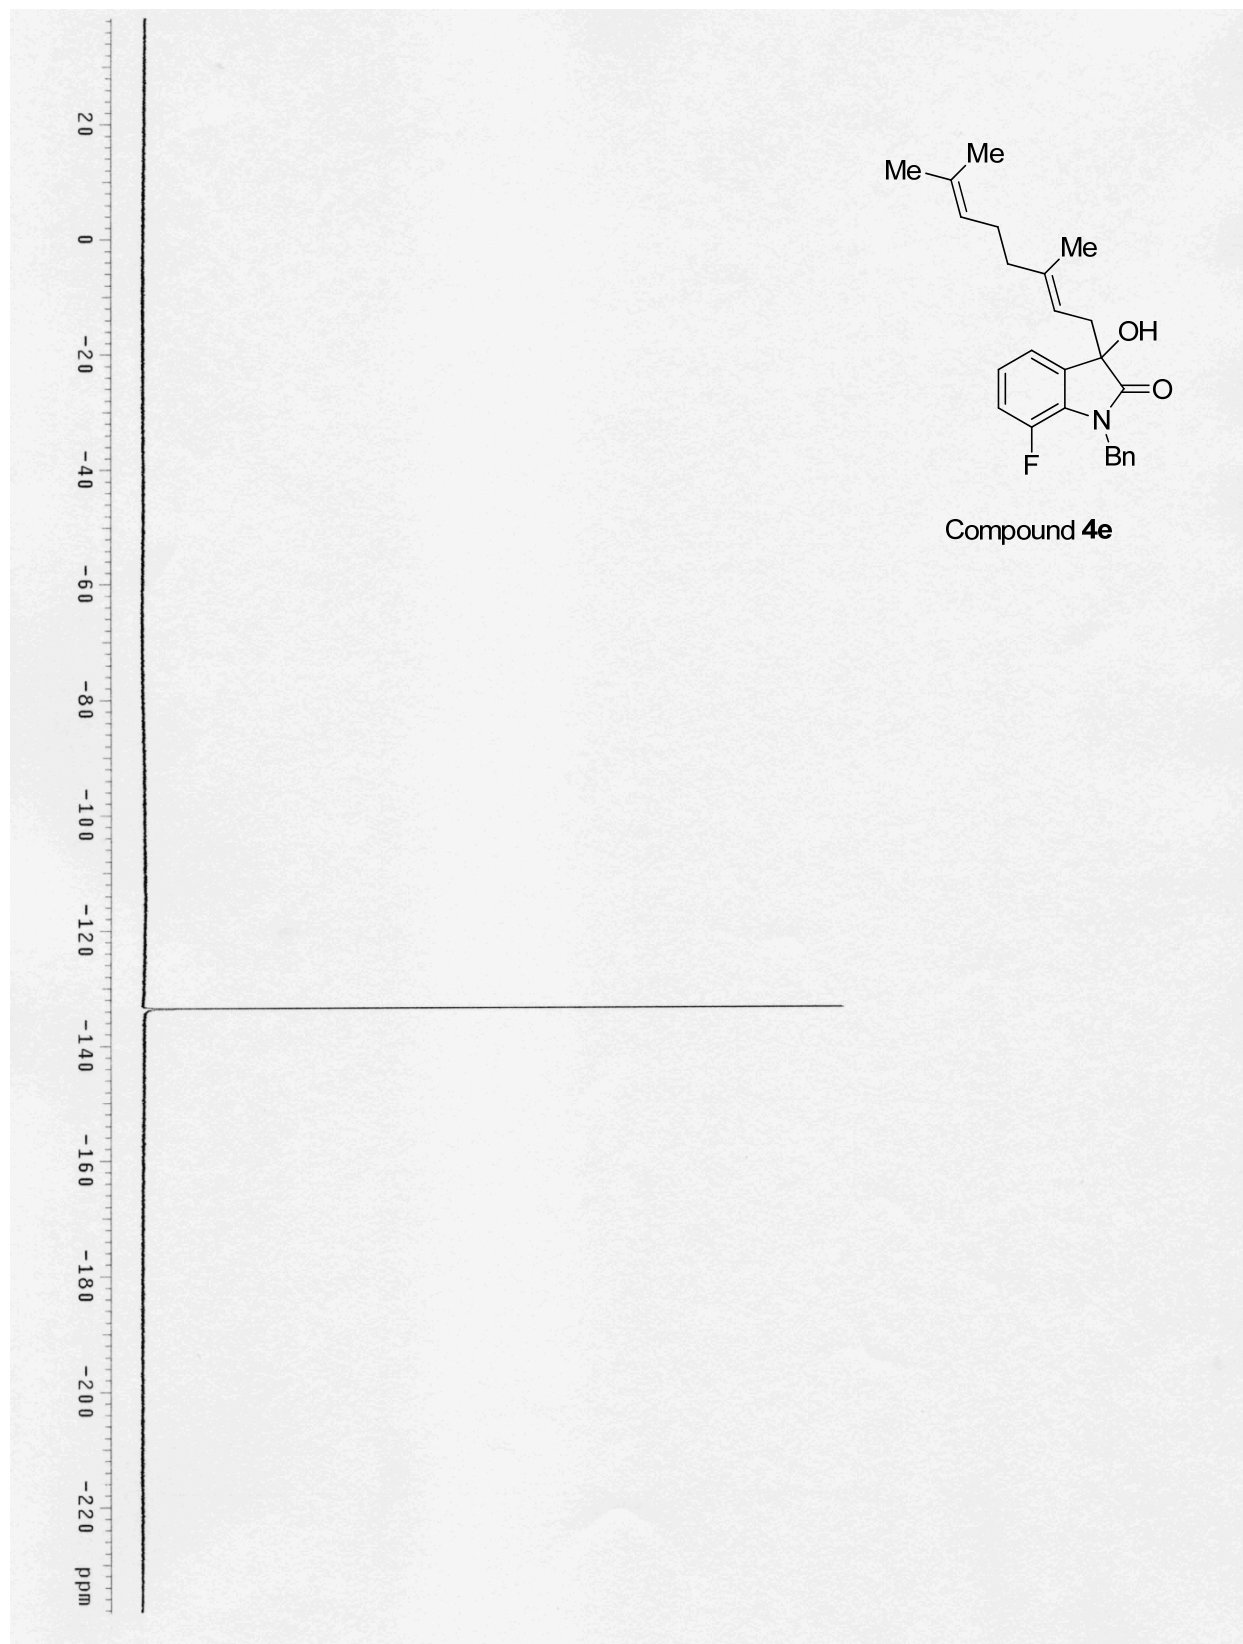

**(E)-ethyl 2-(benzo[*d*][1,3]dioxol-5-yl)-2-hydroxy-5,9-dimethyldeca-4,8-dienoate (4f)**

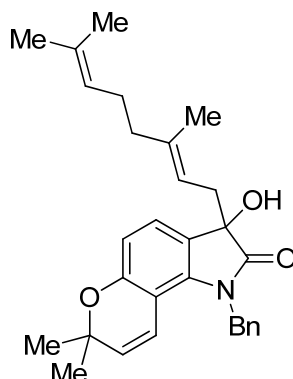

**General Procedure:** The reaction was heated for 48 hours, concentrated *in vacuo* and purified by flash column chromatography (SiO<sub>2</sub>, 15% EtOAc/Hexane) to furnish the title compound (70.4 mg, 77%, >20:1 *E:Z*) as a white solid.

**<sup>1</sup>H NMR** (400 MHz, CDCl<sub>3</sub>): δ 7.32-7.14 (m, 6H), 6.56 (d, *J* = 8.0 Hz, 1H), 6.28 (d, *J* = 10.0 Hz, 1H), 5.47 (d, *J* = 10.0 Hz, 1H), 5.27 (d, *J* = 17.2 Hz, 1H), 5.03-4.99 (m, 2H), 4.86 (d, *J* = 16.8 Hz, 1H), 3.18 (s, 1H), 2.80 (dd, *J* = 13.2, 8.8 Hz, 1H), 2.70 (dd, *J* = 13.6, 6.8 Hz, 1H), 2.03-1.93 (m, 4H), 1.65 (s, 3H), 1.57 (s, 3H), 1.54 (s, 3H), 1.37 (s, 3H), 1.29 (s, 3H)

**<sup>13</sup>C NMR** (100 MHz, CDCl<sub>3</sub>): δ 179.8, 154.7, 140.9, 138.6, 136.3, 131.7, 130.9, 128.9, 127.3, 125.7, 124.1, 123.9, 122.7, 117.3, 115.9, 111.2, 107.1, 75.3, 74.9, 45.6, 39.9, 37.5, 27.6, 26.5, 26.4, 25.7, 17.7, 16.3

**LRMS** (CI) Calcd. For C<sub>30</sub>H<sub>36</sub>NO<sub>3</sub> [M+H]<sup>+</sup>: 458, Found: 458

**FTIR** (neat): 3385, 2976, 2932, 2362, 2246, 1712, 1605, 1454, 1365, 1152, 911, 747 cm<sup>-1</sup>

**Mp:** 147.3-147.7 °C

**TLC** (SiO<sub>2</sub>): R<sub>f</sub> = 0.4 (ethyl acetate: hexanes, 1:4)

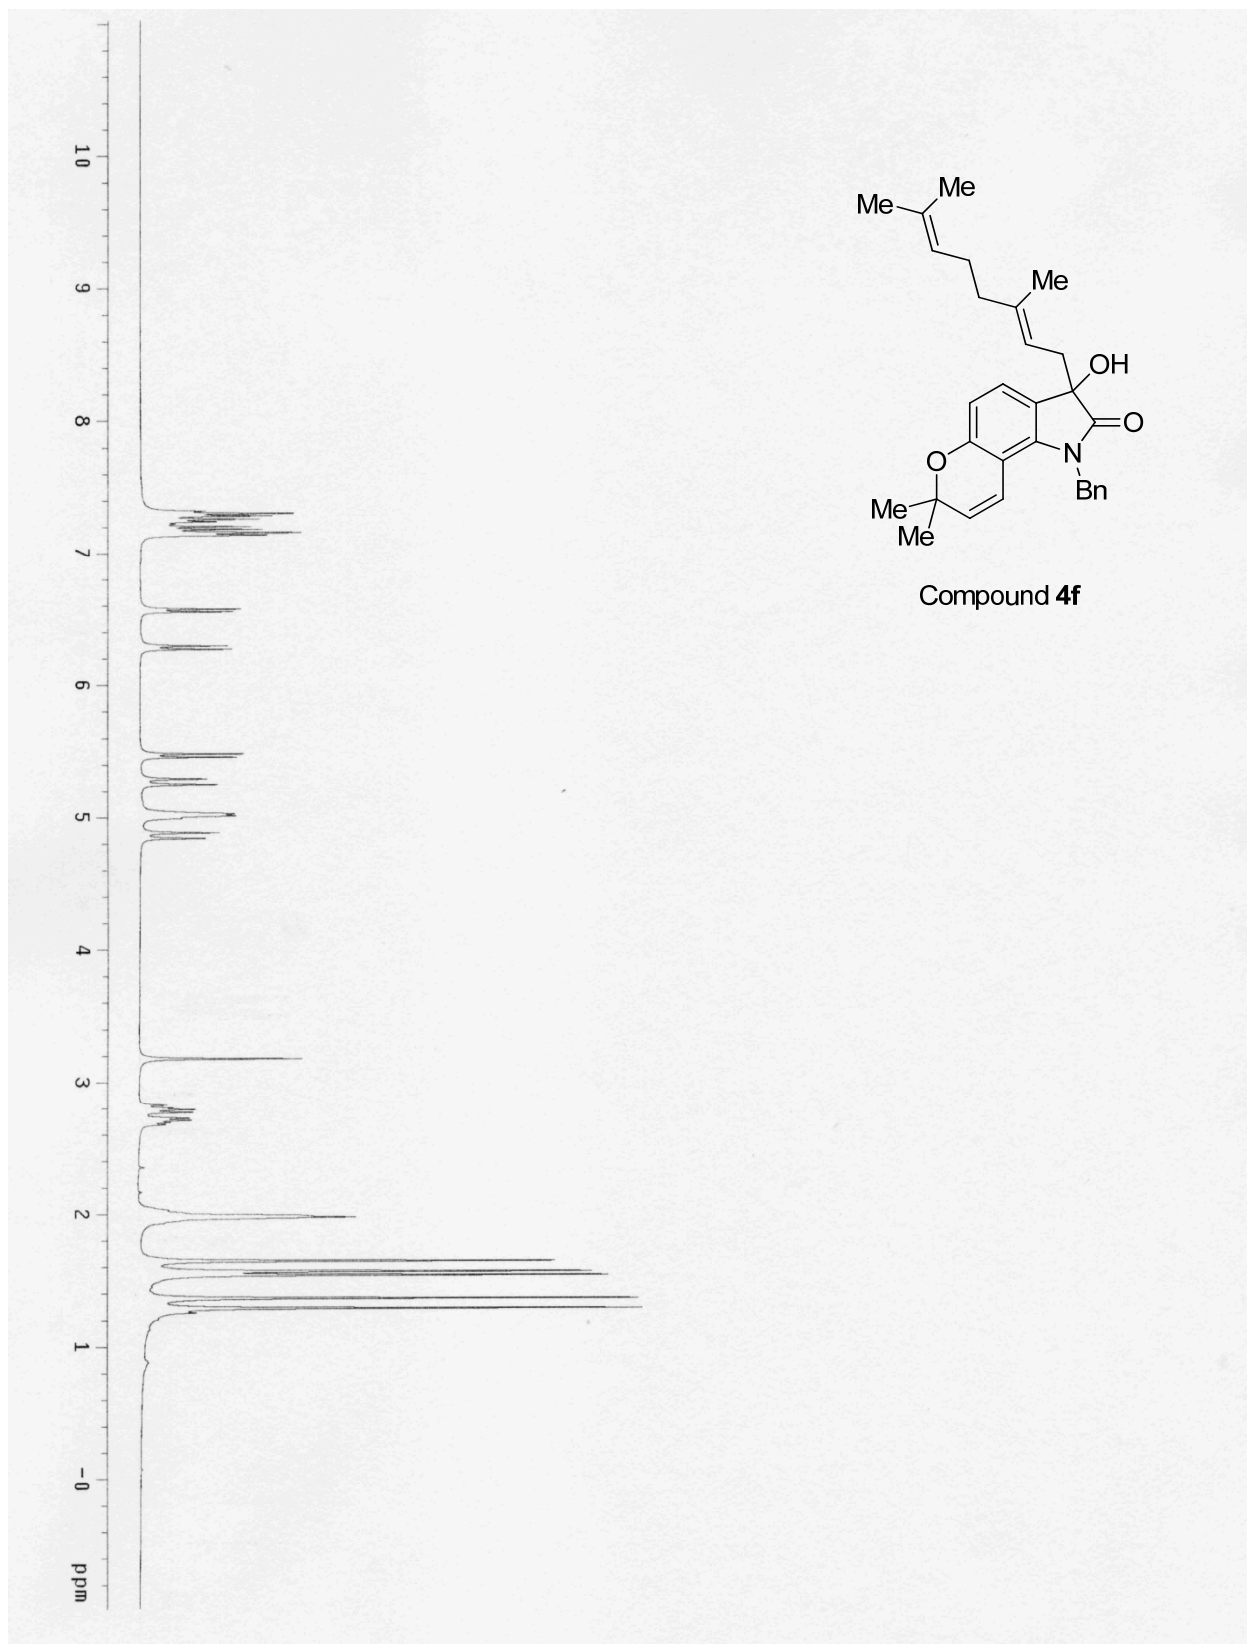

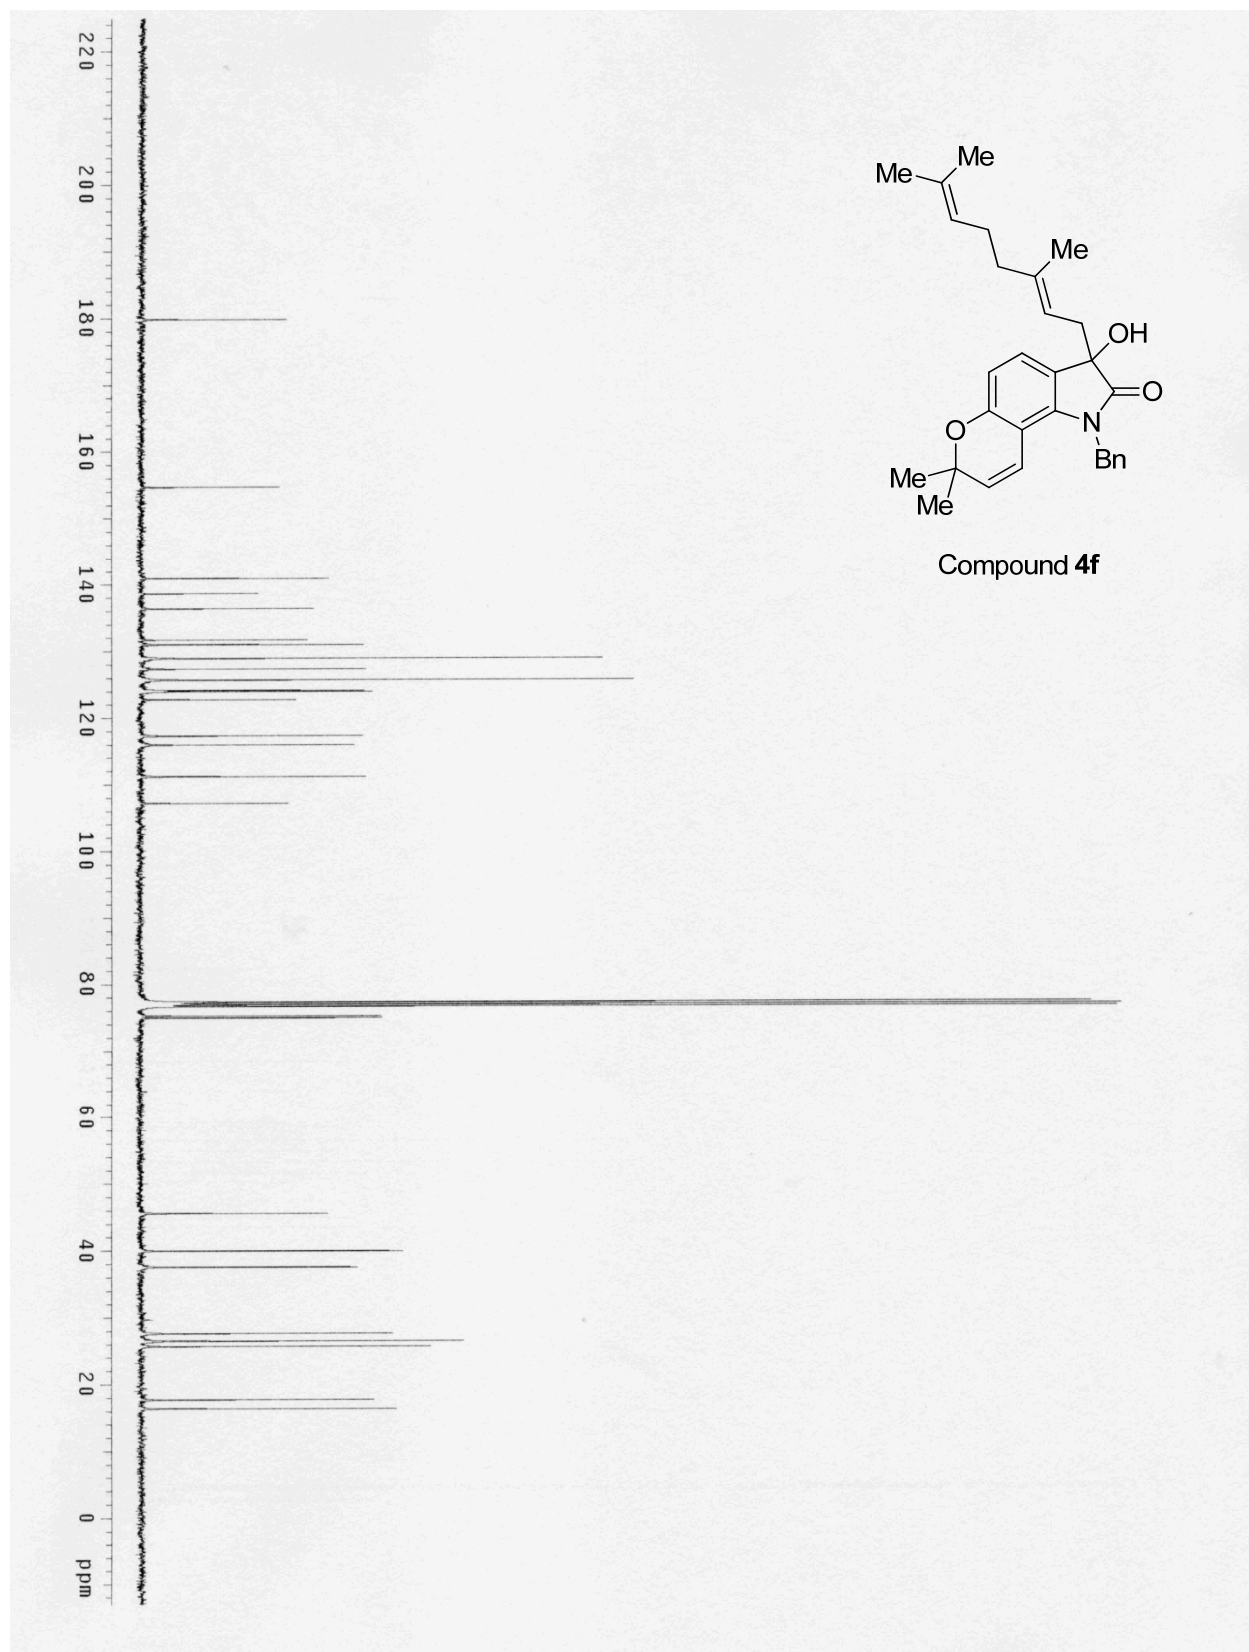

## Experimental Procedures and Spectroscopic Data for 3-Hydroxy-2-oxindoles 5a-5d

### (Z)-1-benzyl-3-(but-2-en-1-yl)-3-hydroxyindolin-2-one (5a)

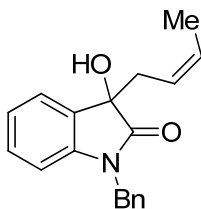

**General Procedure:** The reaction was heated for 24 hours, concentrated *in vacuo* and purified by flash column chromatography (SiO<sub>2</sub>, 15% EtOAc/Hexane) to furnish the title compound (43.9 mg, 75%, >20:1 *Z:E*) as a white solid.

**<sup>1</sup>H NMR** (400 MHz, CDCl<sub>3</sub>): δ 7.42 (dd, *J* = 7.2, 0.8 Hz, 1H), 7.33-7.24 (m, 5H), 7.20 (td, *J* = 7.6, 1.2 Hz, 1H), 7.05 (td, *J* = 8.0, 1.2 Hz, 1H), 6.69 (d, *J* = 7.6 Hz, 1H), 5.58 (dddd, *J* = 14.4, 6.8, 0.8 Hz, 1H), 5.58 (dddd, *J* = 17.6, 8.8, 3.6, 2.0 Hz, 1H), 5.04 (d, *J* = 16.0 Hz, 1H), 4.71 (d, *J* = 15.6 Hz, 1H), 2.91 (s, 1H), 2.84 (dd, *J* = 13.6, 9.2 Hz, 1H), 2.74 (dd, *J* = 13.6, 6.8 Hz, 1H), 1.57 (d, *J* = 6.8, 3H)

**<sup>13</sup>C NMR** (100 MHz, CDCl<sub>3</sub>): δ 178.0, 142.5, 135.4, 129.7, 129.6, 129.3, 128.7, 127.6, 127.2, 123.9, 123.0, 121.7, 109.4, 76.1, 43.8, 36.1, 13.0

**LRMS** (CI) Calcd. For C<sub>19</sub>H<sub>20</sub>NO<sub>2</sub> [M+H]<sup>+</sup>: 294, Found: 294

**FTIR** (neat): 3319, 3029, 2936, 1690, 1610, 1463, 1365, 1178, 751, 698 cm<sup>-1</sup>

**Mp:** 146.4-146.8 °C

**TLC** (SiO<sub>2</sub>): R<sub>f</sub> = 0.4 (ethyl acetate: hexanes, 1:4)

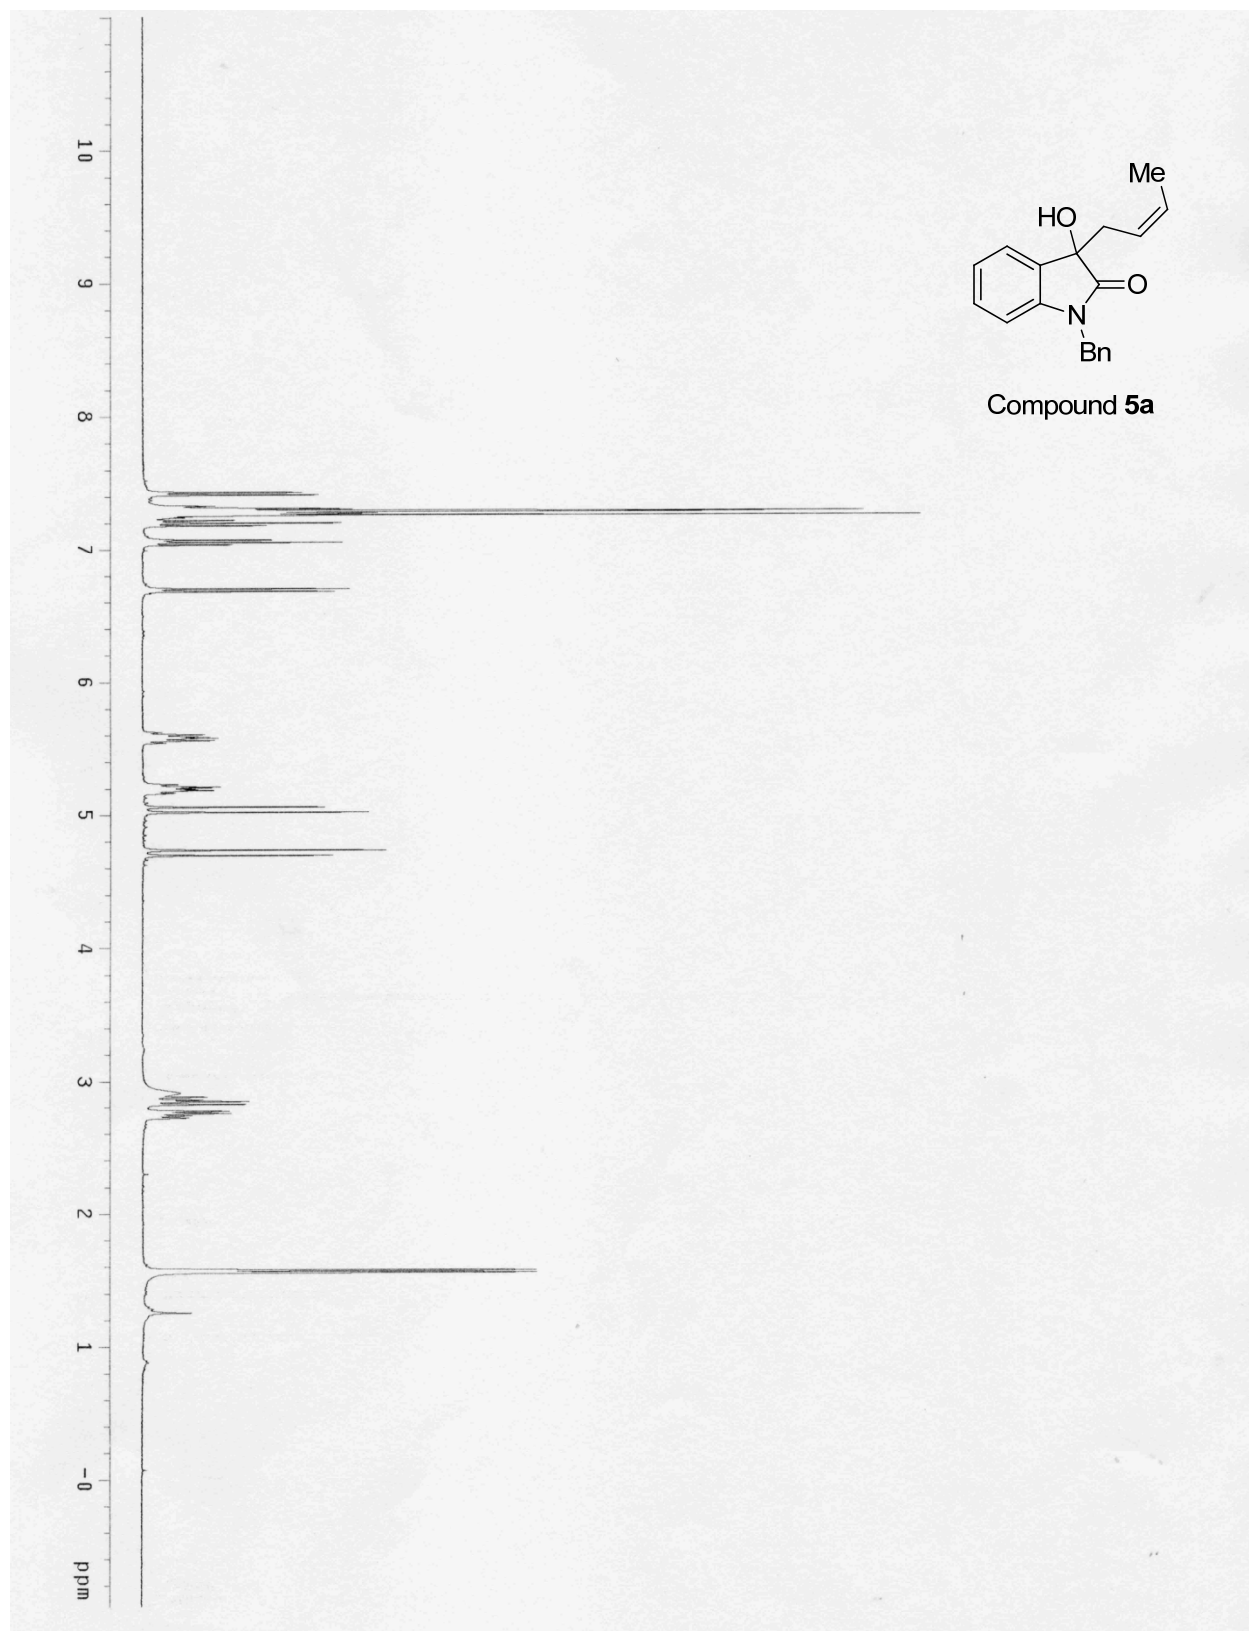



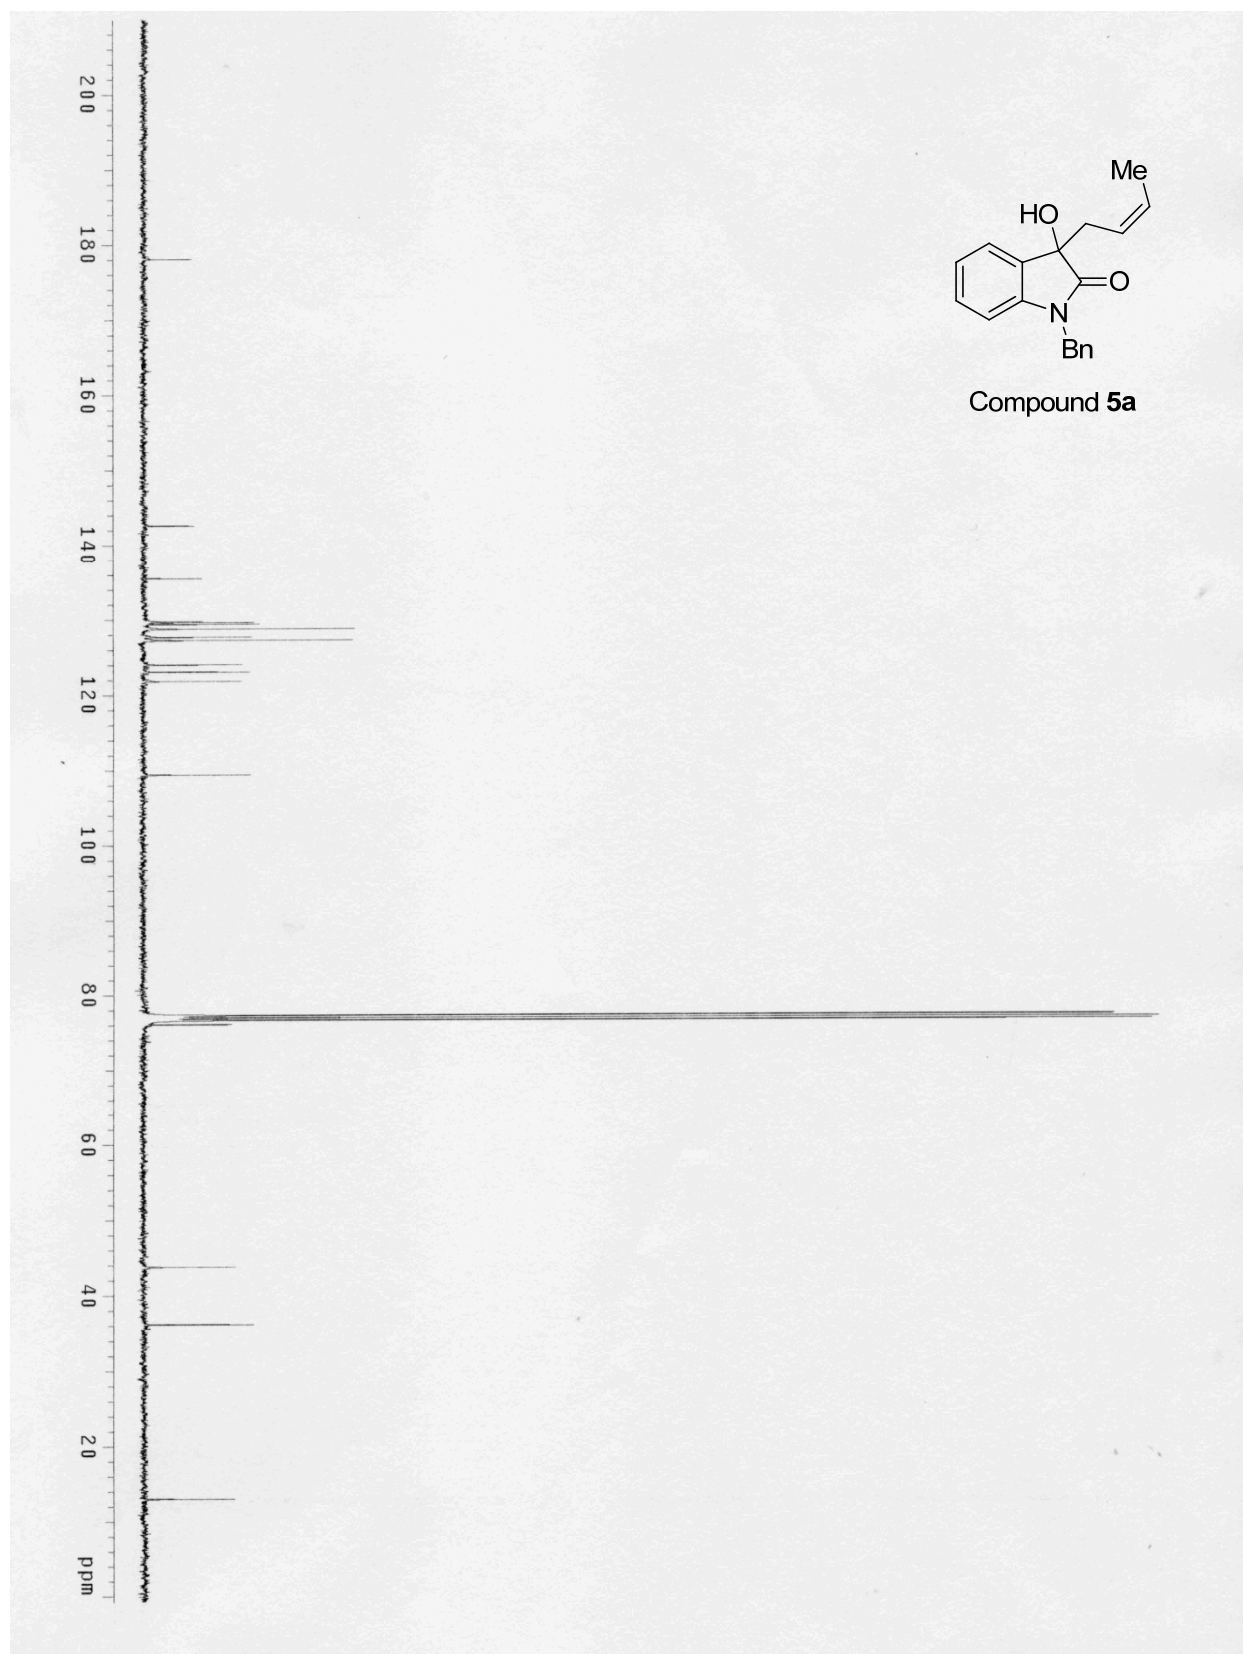

cty\_butadiene\_b\_1\_59p\_1dnoesy  
File: Noesy1d  
Pulse Sequence: NOESY1D

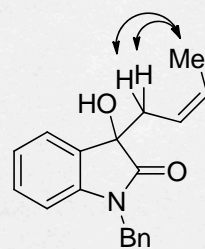

Compound 5a

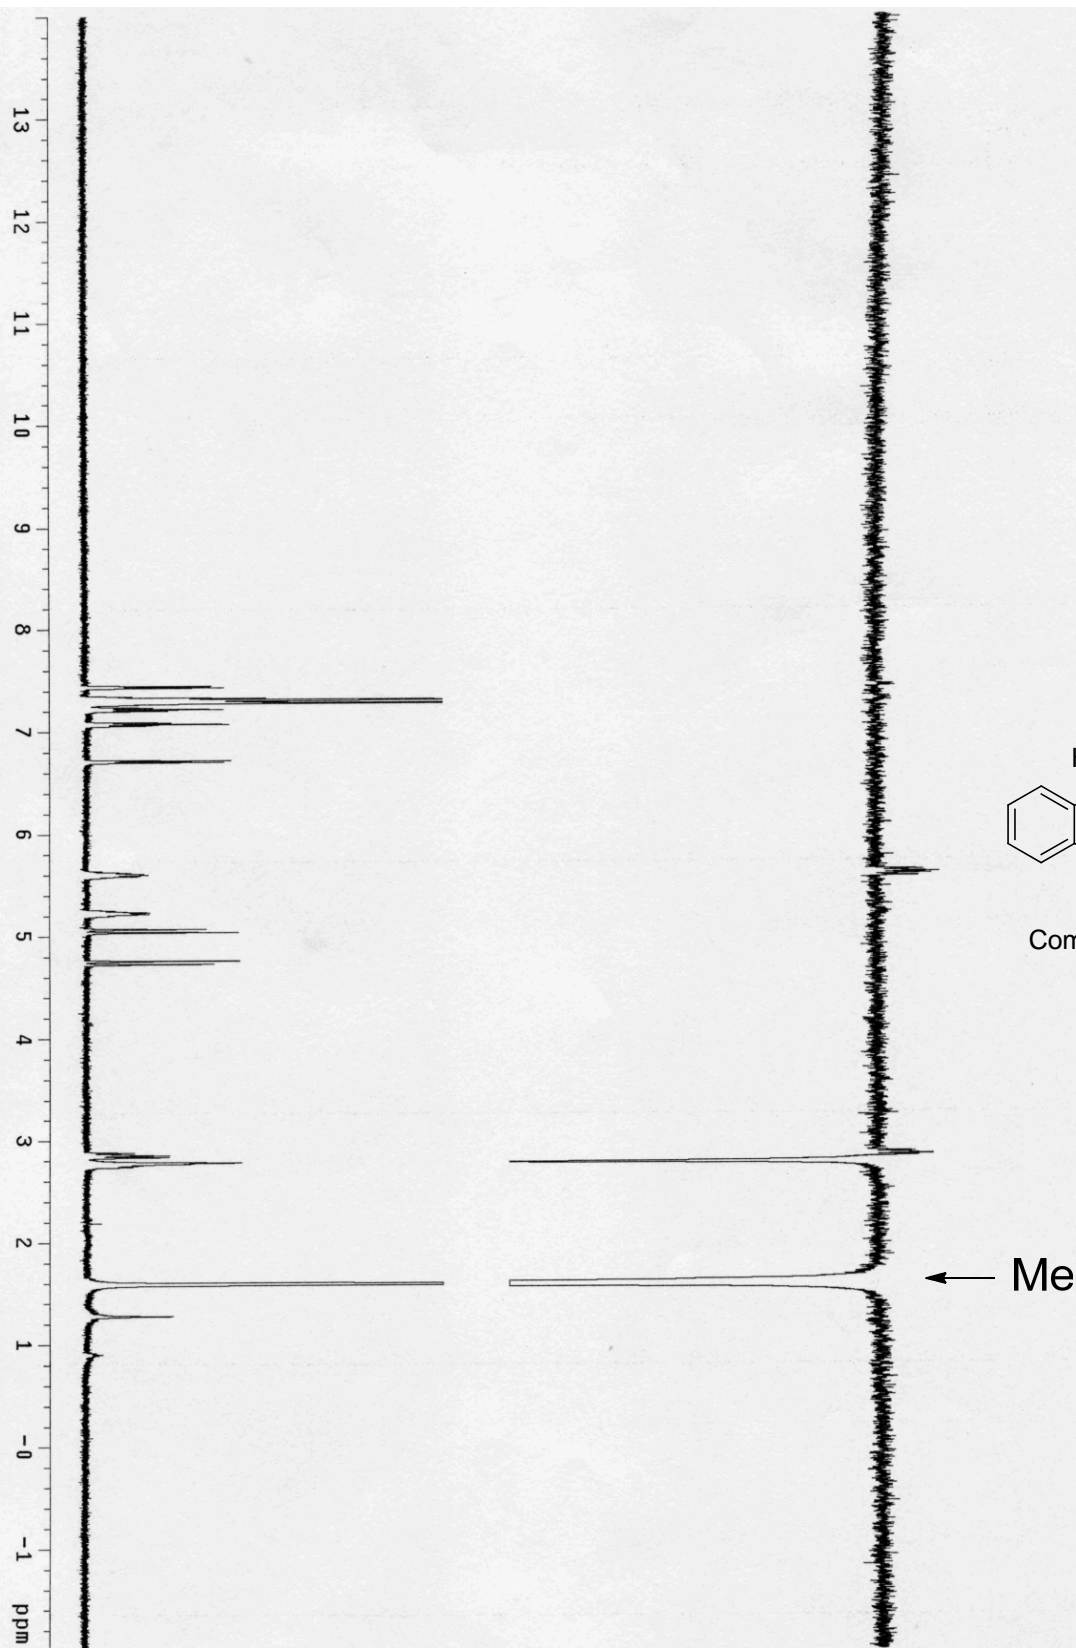

**1-benzyl-3-(cyclohex-2-en-1-yl)-3-hydroxyindolin-2-one (5b)**

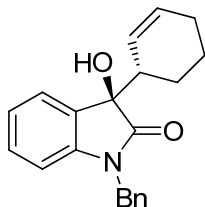

**General Procedure:** The reaction was heated for 24 hours and cyclohexadiene (200 mol%) was added, concentrated *in vacuo* and purified by flash column chromatography (SiO<sub>2</sub>, 15% EtOAc/Hexane) to furnish the title compound (48.5 mg, 76%) as a white solid.

**<sup>1</sup>H NMR** (400 MHz, CDCl<sub>3</sub>): δ 7.33 (dd, *J* = 7.2, 0.8 Hz, 1H), 7.29-7.22 (m, 5H), 7.15 (td, *J* = 7.6, 1.2 Hz, 1H), 6.97 (t, *J* = 7.6 Hz, 1H), 6.66 (d, *J* = 7.6 Hz, 1H), 6.03 (d, *J* = 10.0 Hz, 1H), 5.89 (m, 1H), 4.99 (d, *J* = 16.0 Hz, 1H), 4.69 (d, *J* = 15.6 Hz, 1H), 2.84 (m, 1H), 2.79 (s, 1H), 1.93-1.34 (m, 5H), 0.81 (dd, *J* = 12.8, 3.2, 1H)

**<sup>13</sup>C NMR** (100 MHz, CDCl<sub>3</sub>): δ 178.0, 143.0, 135.5, 130.9, 129.4, 128.7, 128.3, 127.6, 127.3, 125.1, 124.6, 122.8, 109.1, 78.3, 43.8, 43.7, 24.8, 23.4, 21.2

**LRMS** (CI) Calcd. For C<sub>21</sub>H<sub>22</sub>NO<sub>2</sub> [M+H]<sup>+</sup>: 320, Found: 320

**FTIR** (neat): 3336, 2936, 2353, 1703, 1610, 1472, 1383, 1169, 1107, 1005, 902, 738, 693 cm<sup>-1</sup>

**Mp:** 170.3-171.0 °C

**TLC** (SiO<sub>2</sub>): R<sub>f</sub> = 0.4 (ethyl acetate: hexanes, 1:4)

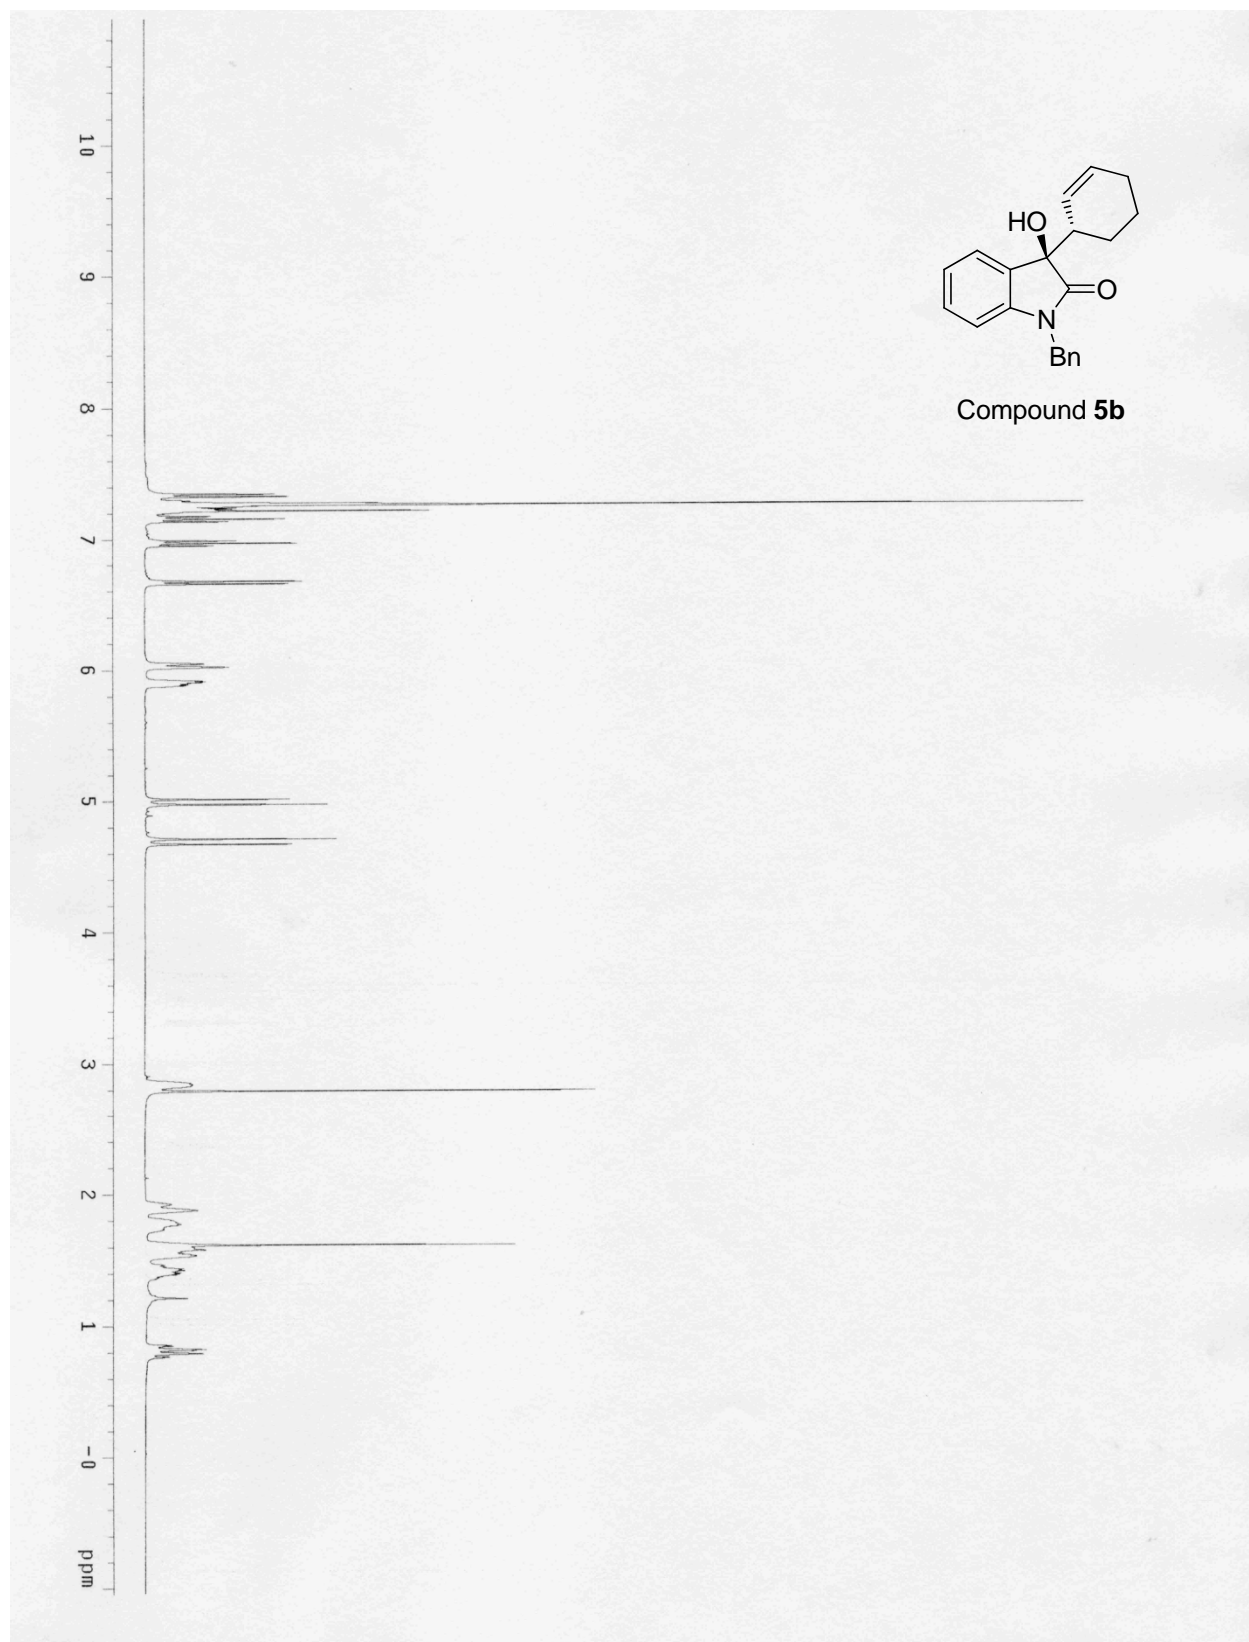

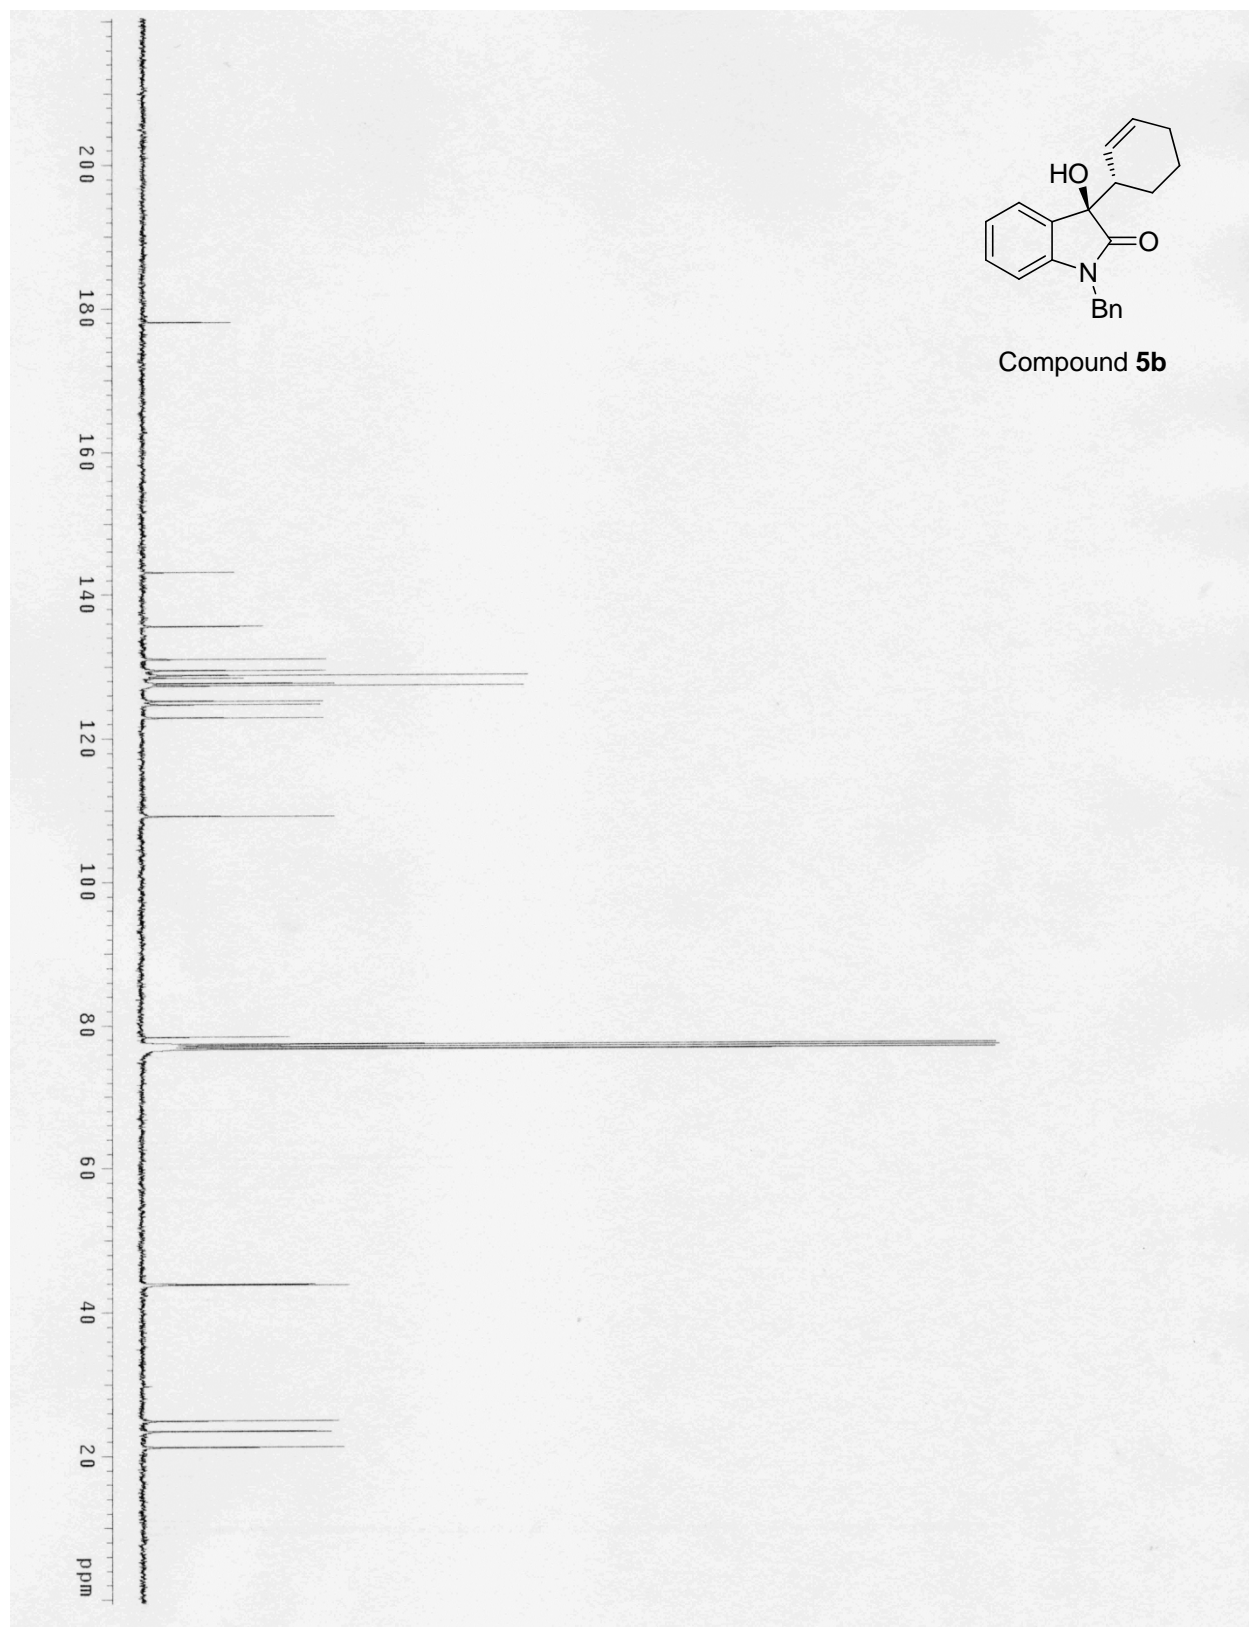

**(E)-1-benzyl-3-(3-(dimethyl(phenyl)silyl)but-2-en-1-yl)-3-hydroxyindolin-2-one (5c)**

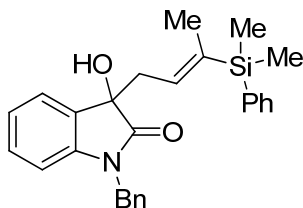

**General Procedure:** The reaction was heated for 24 hours under 120°C and silylpren (300 mol%) was added, concentrated *in vacuo* and purified by flash column chromatography (SiO<sub>2</sub>, 15% EtOAc/Hexane) to furnish the title compound (60.2 mg, 71%, >20:1 *E:Z*) as a yellow solid.

**<sup>1</sup>H NMR** (400 MHz, CDCl<sub>3</sub>): δ 7.33-7.22 (m, 11H), 7.19 (td, *J* = 7.6, 1.2 Hz, 1H), 6.99 (td, *J* = 7.2, 0.8 Hz, 1H), 6.67 (d, *J* = 8.0 Hz, 1H), 5.60 (td, *J* = 7.6, 2.0 Hz, 1H), 4.80 (s, 2H), 2.90 (dd, *J* = 14.0, 7.6 Hz, 1H), 2.80 (dd, *J* = 14.0, 7.2 Hz, 1H), 2.74 (s, 1H), 1.57 (t, *J* = 1.2, 3H), 0.21 (s, 3H), 0.17 (s, 3H)

**<sup>13</sup>C NMR** (100 MHz, CDCl<sub>3</sub>): δ 178.2, 142.4, 139.9, 137.9, 135.4, 133.8, 132.1, 129.6, 129.5, 128.8, 127.7, 127.2, 124.1, 122.9, 109.4, 76.2, 43.8, 37.5, 15.1, -3.5, -3.7

**LRMS** (CI) Calcd. For C<sub>27</sub>H<sub>30</sub>NO<sub>2</sub>Si [M+H]<sup>+</sup>: 428, Found: 428

**FTIR** (neat): 3394, 2936, 2322, 1721, 1610, 1463, 1356, 1249, 1165, 1107, 996, 822, 751, 698 cm<sup>-1</sup>

**Mp:** 122.6-123.1 °C

**TLC** (SiO<sub>2</sub>): R<sub>f</sub> = 0.4 (ethyl acetate: hexanes, 1:4)

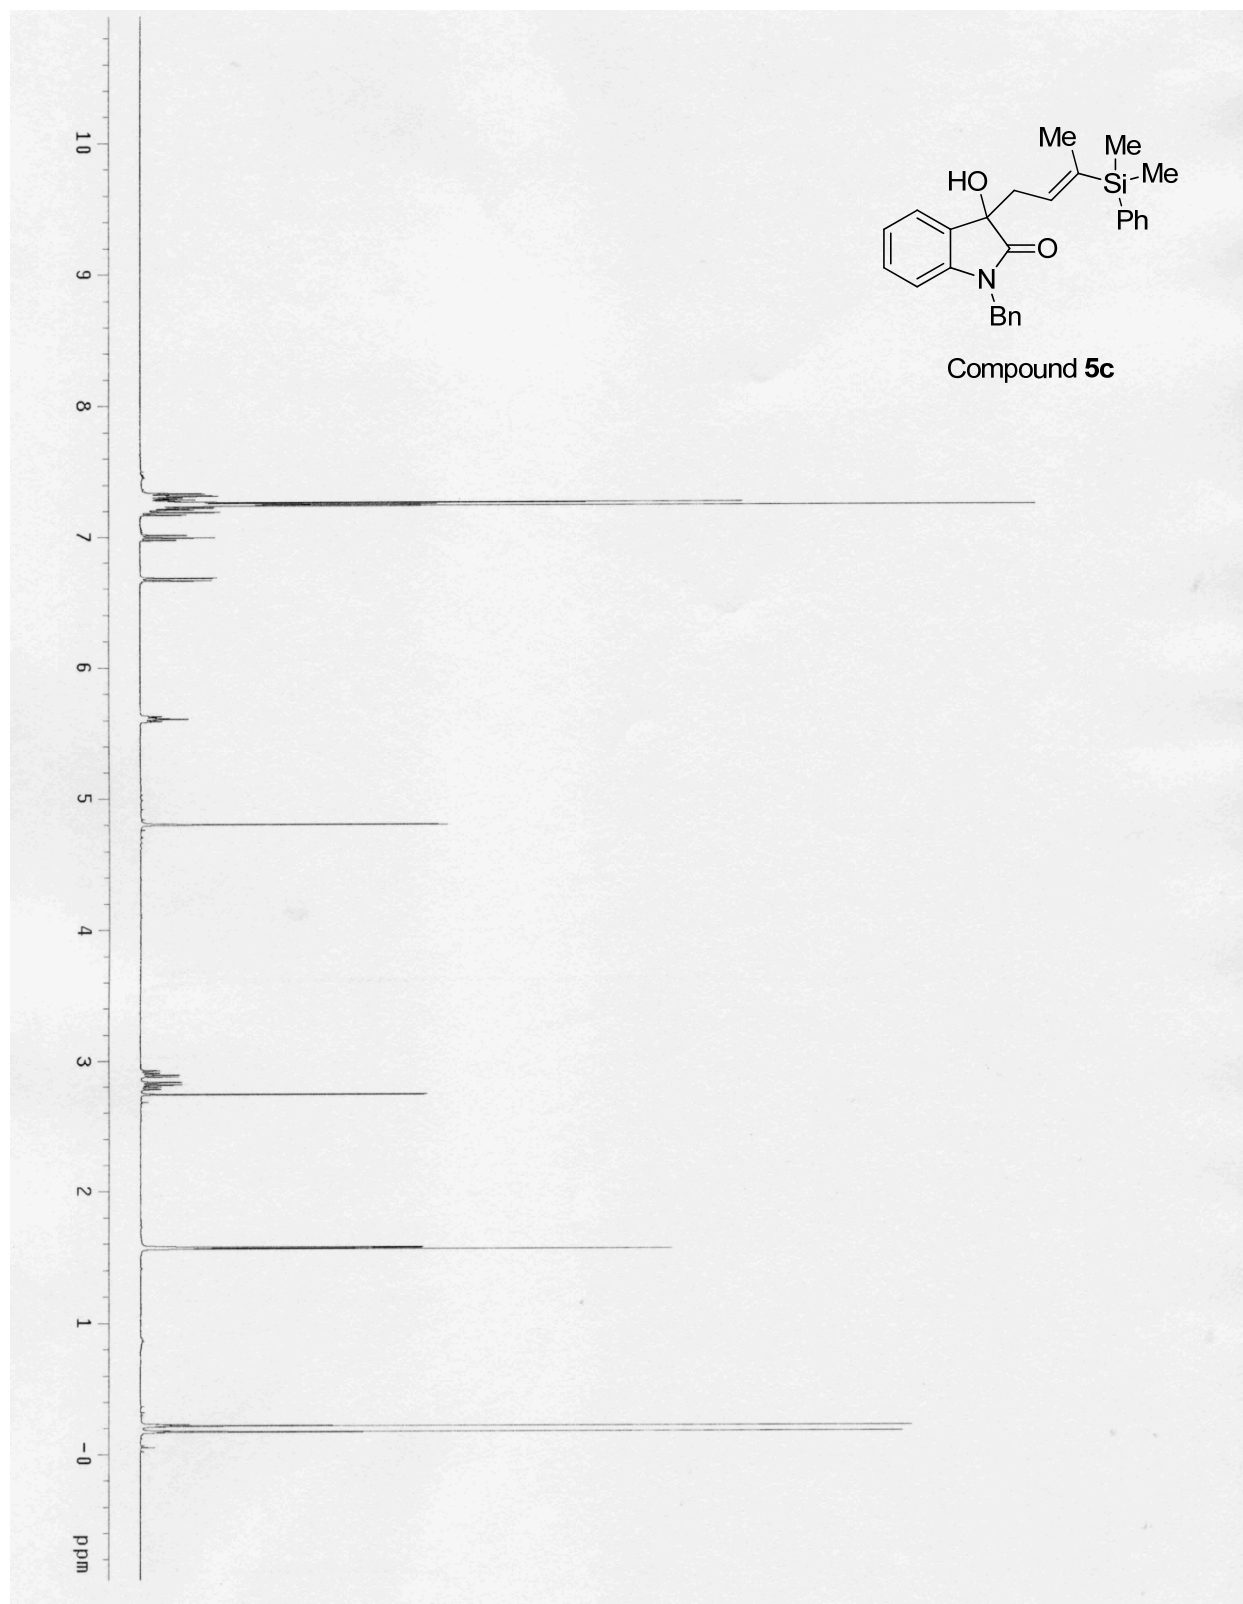

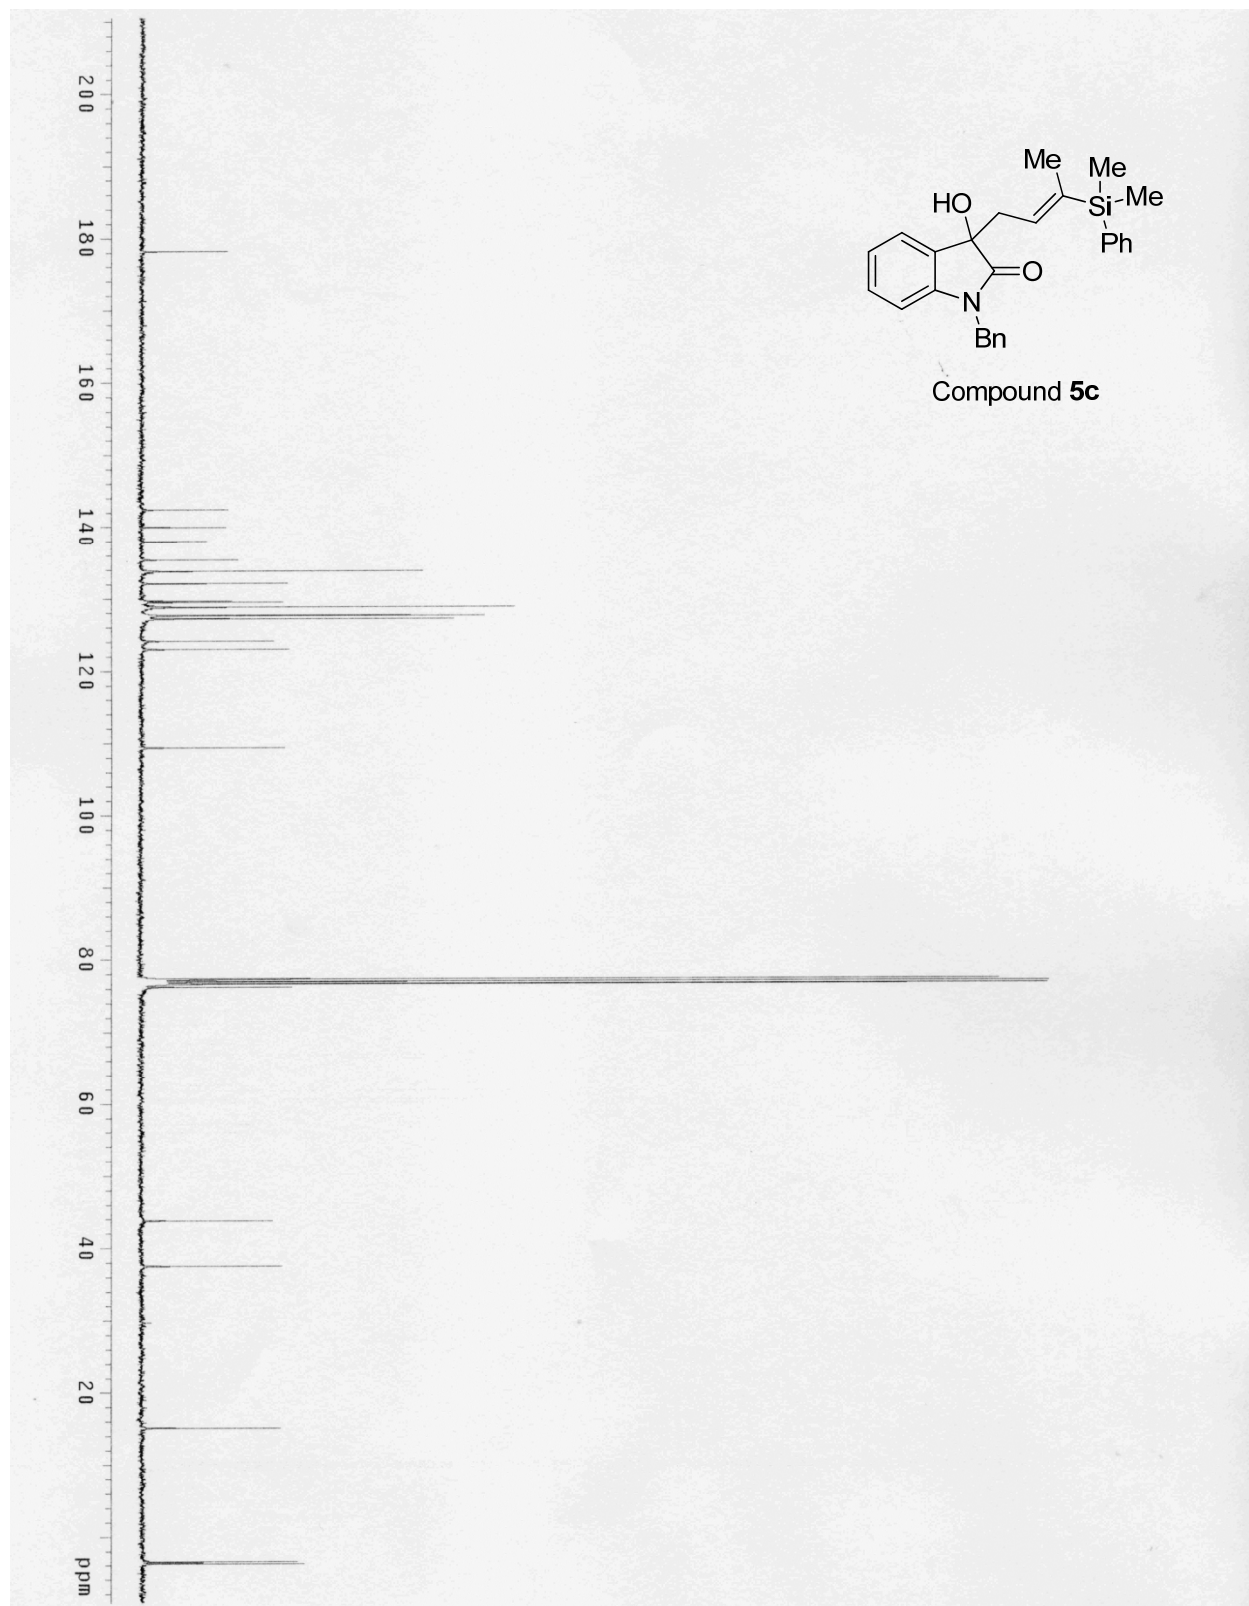



CTY-S11V1

File: xp

Pulse Sequence: NOESY1D

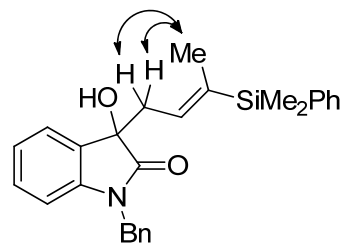

Compound 5c

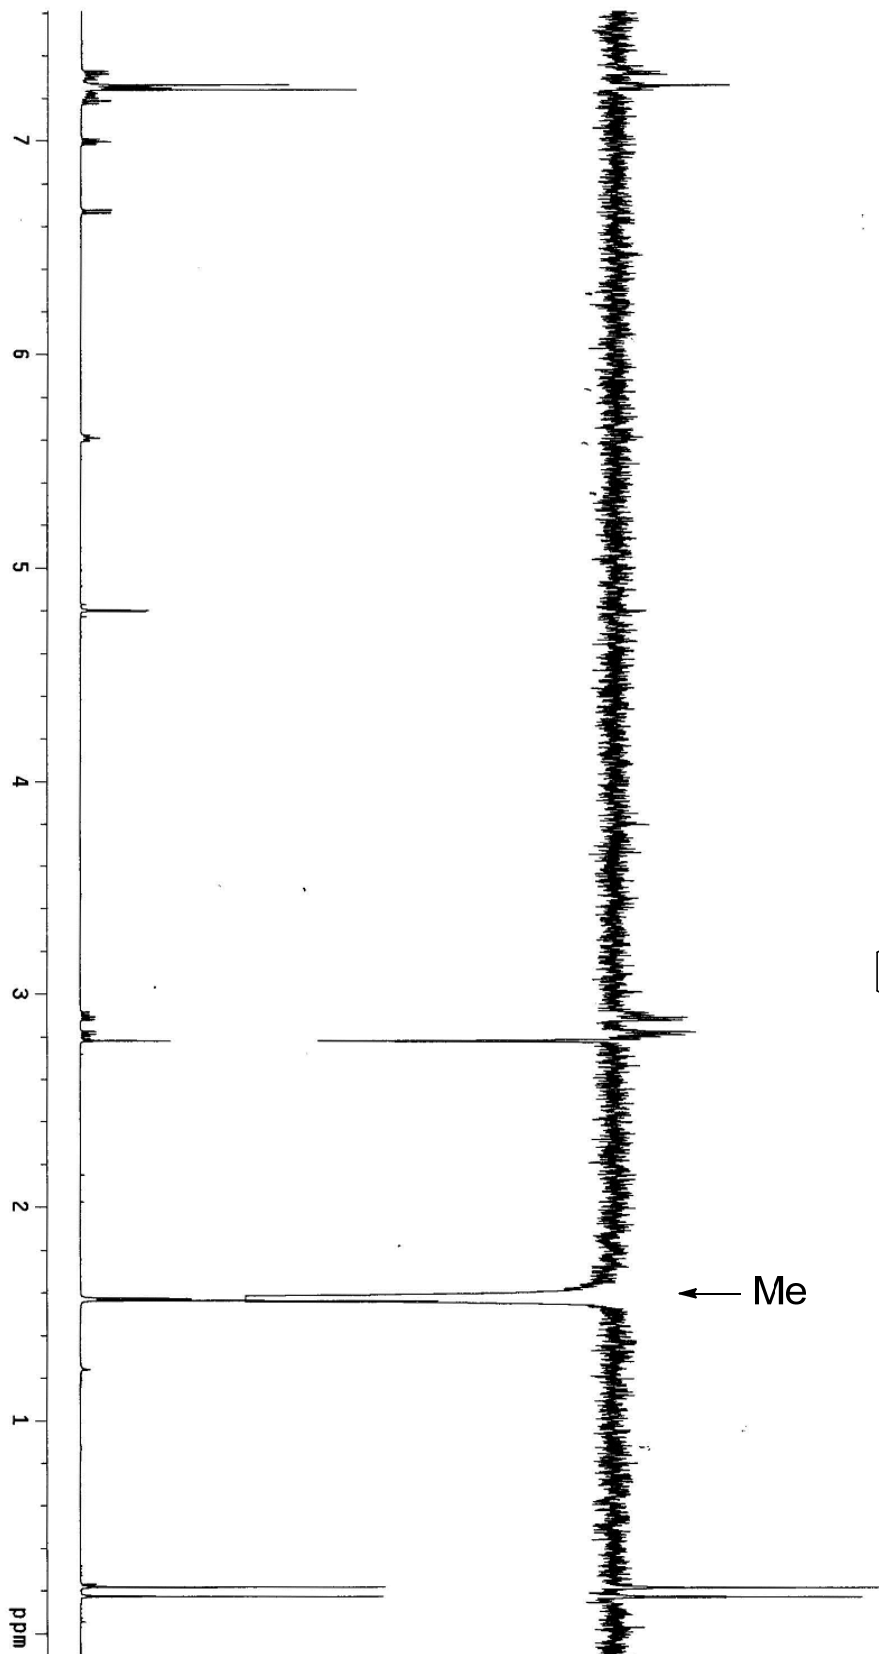

**(E)-1-benzyl-3-hydroxy-3-(3-methyl-7-phenylhept-2-en-1-yl)indolin-2-one (5d)**

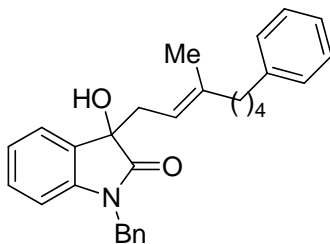

**General Procedure:** The reaction was heated for 24 hours, concentrated *in vacuo* and purified by flash column chromatography (SiO<sub>2</sub>, 15% EtOAc/Hexane) to furnish the title compound (68.5 mg, 81%, >20:1 *E:Z*) as a white solid.

**<sup>1</sup>H NMR** (400 MHz, CDCl<sub>3</sub>): δ 7.38 (d, *J* = 7.6 Hz, 1H), 7.31-7.24 (m, 7H), 7.19-7.11 (m, 4H), 7.02 (td, *J* = 8.0, 0.8 Hz, 1H), 6.61 (d, *J* = 8.0 Hz, 1H), 4.97-4.89 (m, 2H), 4.67 (d, *J* = 16.0 Hz, 1H), 2.76-2.73 (m, 2H), 2.69 (s, 1H), 2.51 (t, *J* = 7.6 Hz, 1H), 1.95-1.86 (m, 2H), 1.52 (s, 3H), 1.45-1.20 (m, 5H)

**<sup>13</sup>C NMR** (100 MHz, CDCl<sub>3</sub>): δ 178.1, 142.6, 142.5, 140.8, 135.5, 129.8, 129.5, 128.7, 128.4, 128.2, 127.6, 127.2, 125.6, 123.9, 122.9, 115.7, 109.3, 76.4, 43.7, 39.7, 37.4, 35.8, 30.8, 27.3, 16.1

**LRMS** (CI) Calcd. For C<sub>29</sub>H<sub>32</sub>NO<sub>2</sub> [M+H]<sup>+</sup>: 426, Found: 426

**FTIR** (neat): 3323, 2923, 2847, 2349, 1690, 1619, 1445, 1370, 1294, 1178, 1085, 996, 742, 693 cm<sup>-1</sup>

**Mp:** 127.8-128.3 °C

**TLC** (SiO<sub>2</sub>): R<sub>f</sub> = 0.4 (ethyl acetate: hexanes, 1:4)

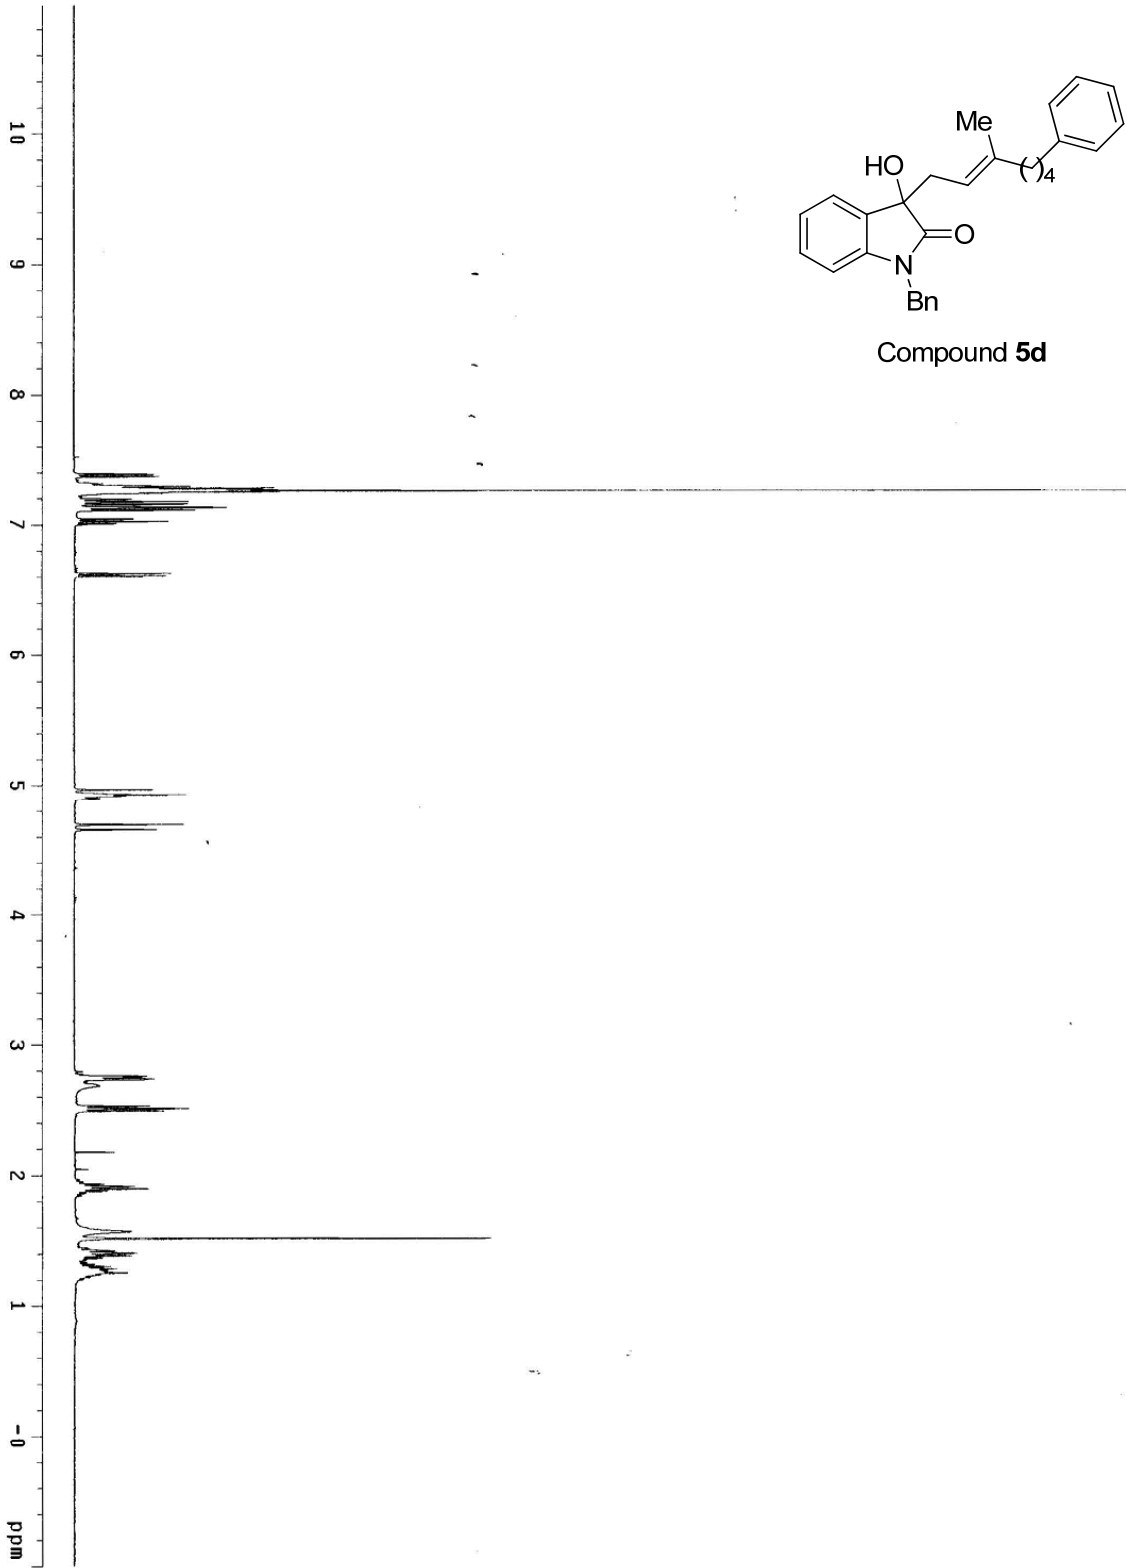

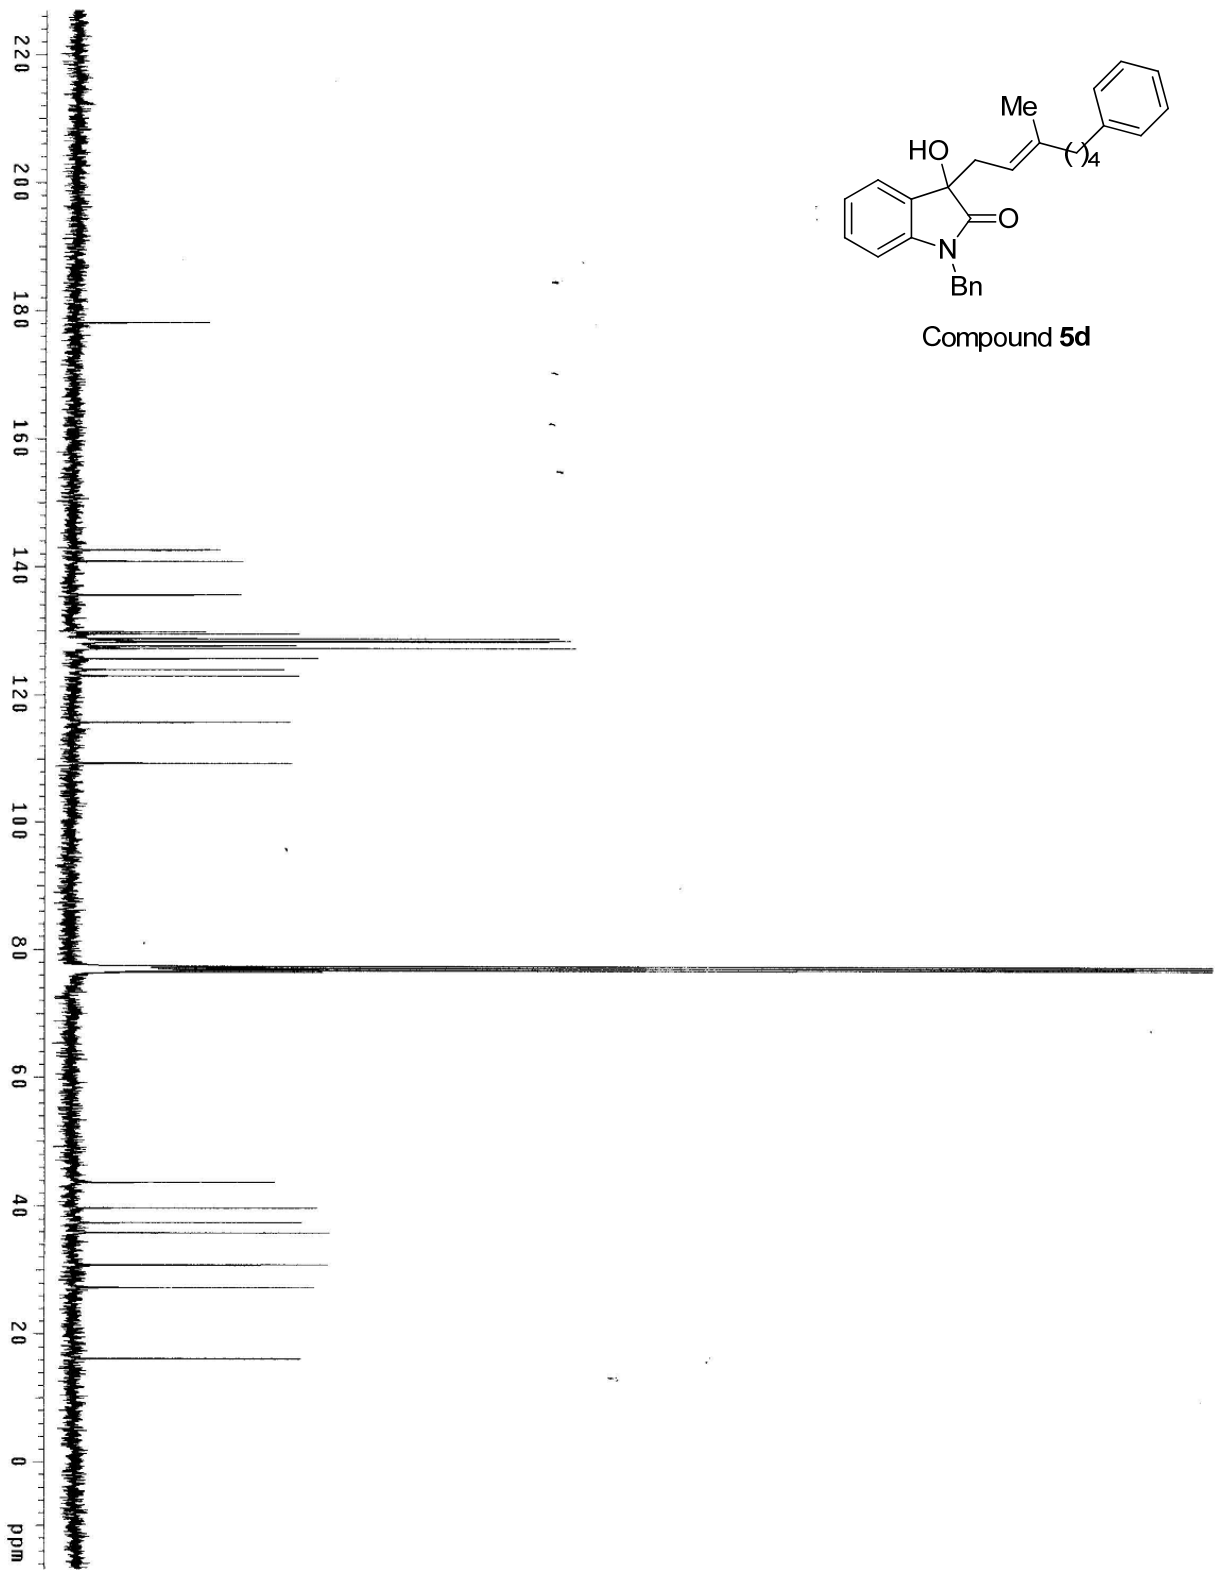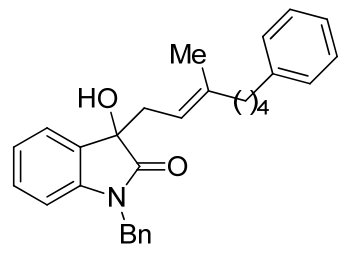

Compound 5d

cty\_BuPh\_1\_54p\_noesy1d  
Filter: Noesy1d  
Pulse Sequence: NOESY1D

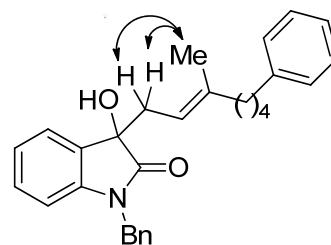

Compound 5d

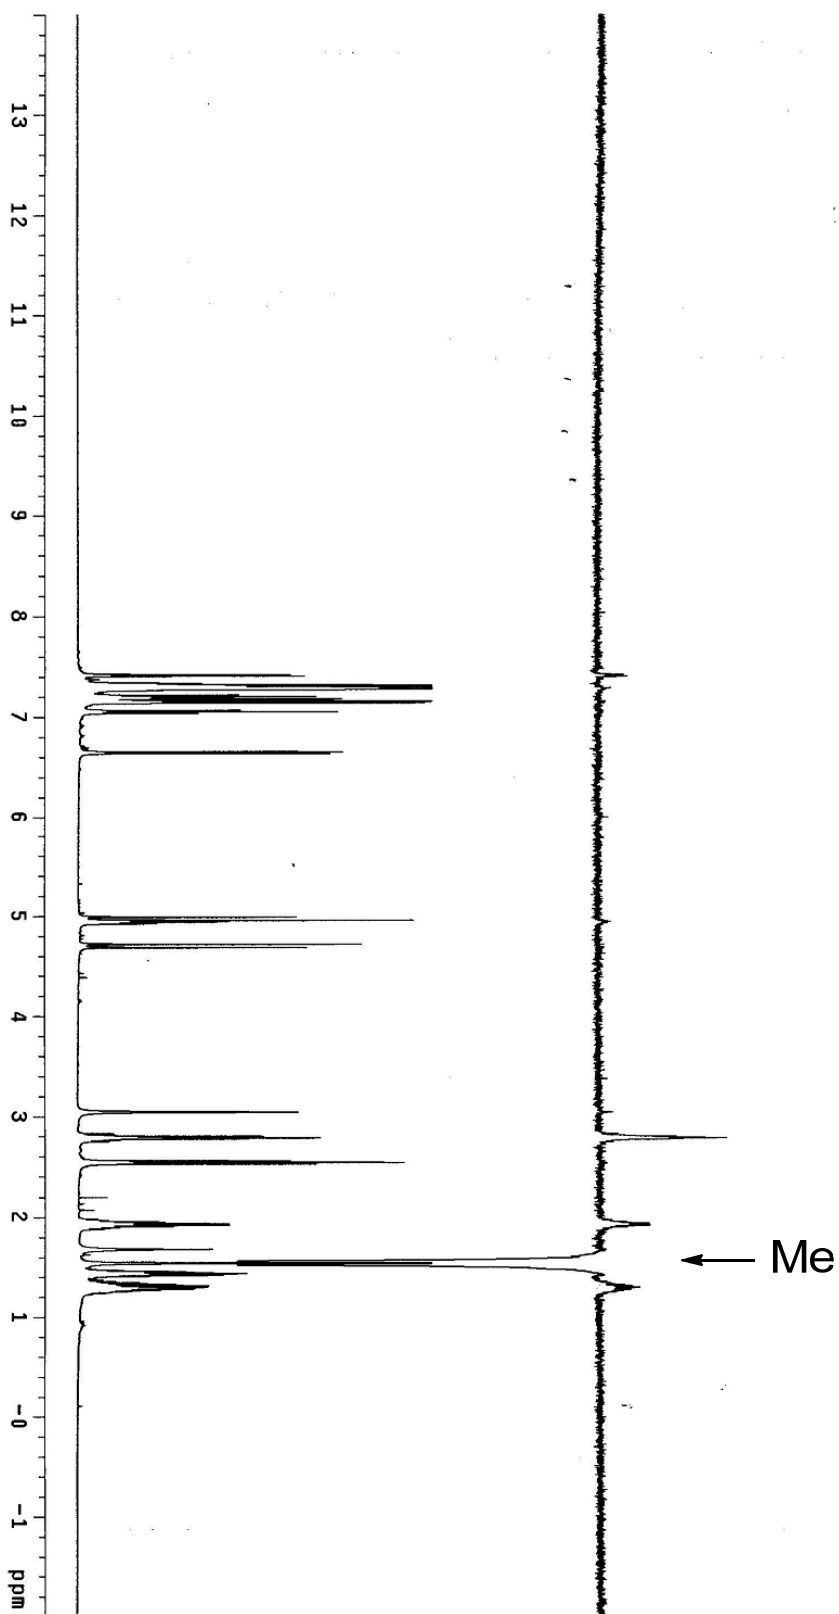

**Crystal structure of product 1-benzyl-3-(cyclohex-2-en-1-yl)-3-hydroxyindolin-2-one (5b)**

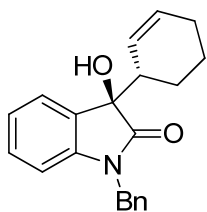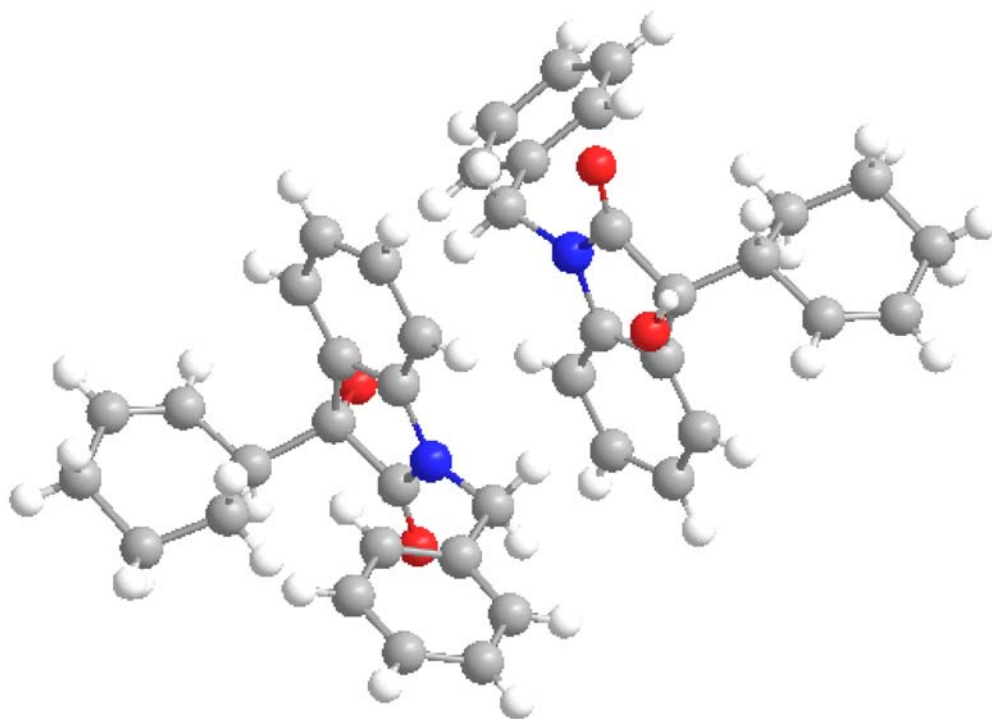

Table 1. Crystal data and structure refinement for 1.

|                      |                                                  |                  |
|----------------------|--------------------------------------------------|------------------|
| Empirical formula    | C <sub>21</sub> H <sub>21</sub> N O <sub>2</sub> |                  |
| Formula weight       | 319.39                                           |                  |
| Temperature          | 153(2) K                                         |                  |
| Wavelength           | 0.71075 Å                                        |                  |
| Crystal system       | Monoclinic                                       |                  |
| Space group          | P21/c                                            |                  |
| Unit cell dimensions | a = 9.4044(15) Å                                 | α = 90°.         |
|                      | b = 19.072(2) Å                                  | β = 101.853(3)°. |
|                      | c = 18.984(2) Å                                  | γ = 90°.         |
| Volume               | 3332.4(7) Å <sup>3</sup>                         |                  |
| Z                    | 8                                                |                  |

|                                   |                                             |
|-----------------------------------|---------------------------------------------|
| Density (calculated)              | 1.273 Mg/m <sup>3</sup>                     |
| Absorption coefficient            | 0.081 mm <sup>-1</sup>                      |
| F(000)                            | 1360                                        |
| Crystal size                      | 0.48 x 0.05 x 0.02 mm                       |
| Theta range for data collection   | 3.06 to 25.00°.                             |
| Index ranges                      | -11<=h<=11, -22<=k<=22, -22<=l<=22          |
| Reflections collected             | 50065                                       |
| Independent reflections           | 5869 [R(int) = 0.1784]                      |
| Completeness to theta = 25.00°    | 99.8 %                                      |
| Absorption correction             | Semi-empirical from equivalents             |
| Max. and min. transmission        | 1.00 and 0.513                              |
| Refinement method                 | Full-matrix least-squares on F <sup>2</sup> |
| Data / restraints / parameters    | 5869 / 0 / 441                              |
| Goodness-of-fit on F <sup>2</sup> | 1.075                                       |
| Final R indices [I>2sigma(I)]     | R1 = 0.0844, wR2 = 0.1457                   |
| R indices (all data)              | R1 = 0.1653, wR2 = 0.1740                   |
| Largest diff. peak and hole       | 0.222 and -0.308 e.Å <sup>-3</sup>          |

Table 2. Atomic coordinates ( $\times 10^4$ ) and equivalent isotropic displacement parameters ( $\text{\AA}^2 \times 10^3$ ) for 1.  $U(\text{eq})$  is defined as one third of the trace of the orthogonalized  $U^{ij}$  tensor.

|     | x        | y       | z       | $U(\text{eq})$ |
|-----|----------|---------|---------|----------------|
| C1  | 4752(4)  | 5949(2) | 2138(2) | 30(1)          |
| C2  | 4754(4)  | 6042(2) | 2945(2) | 29(1)          |
| C3  | 6315(4)  | 5863(2) | 3293(2) | 28(1)          |
| C4  | 7041(4)  | 5876(2) | 4003(2) | 35(1)          |
| C5  | 8527(4)  | 5709(2) | 4162(2) | 41(1)          |
| C6  | 9247(4)  | 5538(2) | 3617(2) | 41(1)          |
| C7  | 8522(4)  | 5526(2) | 2898(2) | 39(1)          |
| C8  | 7049(4)  | 5686(2) | 2748(2) | 29(1)          |
| C9  | 3583(4)  | 5552(2) | 3145(2) | 27(1)          |
| C10 | 3543(4)  | 5596(2) | 3930(2) | 32(1)          |
| C11 | 3321(4)  | 5042(2) | 4325(2) | 35(1)          |
| C12 | 3033(5)  | 4314(2) | 4024(2) | 40(1)          |
| C13 | 2676(4)  | 4322(2) | 3204(2) | 40(1)          |
| C14 | 3738(4)  | 4787(2) | 2920(2) | 32(1)          |
| C15 | 6497(4)  | 5560(2) | 1388(2) | 36(1)          |
| C16 | 6480(4)  | 4784(2) | 1211(2) | 30(1)          |
| C17 | 6394(4)  | 4267(2) | 1715(2) | 33(1)          |
| C18 | 6380(4)  | 3556(2) | 1526(2) | 40(1)          |
| C19 | 6454(4)  | 3367(2) | 838(2)  | 44(1)          |
| C20 | 6540(4)  | 3872(2) | 331(2)  | 44(1)          |
| C21 | 6561(4)  | 4577(2) | 518(2)  | 41(1)          |
| C22 | 10502(4) | 7113(2) | 2524(2) | 32(1)          |
| C23 | 10438(4) | 7015(2) | 1707(2) | 29(1)          |
| C24 | 8844(4)  | 7170(2) | 1402(2) | 31(1)          |
| C25 | 8059(4)  | 7166(2) | 705(2)  | 37(1)          |
| C26 | 6556(4)  | 7308(2) | 580(2)  | 40(1)          |
| C27 | 5897(4)  | 7441(2) | 1154(2) | 41(1)          |
| C28 | 6667(4)  | 7451(2) | 1859(2) | 35(1)          |
| C29 | 8142(4)  | 7317(2) | 1968(2) | 32(1)          |
| C30 | 11515(4) | 7505(2) | 1461(2) | 31(1)          |
| C31 | 11530(4) | 7423(2) | 671(2)  | 36(1)          |



|     |          |         |         |       |
|-----|----------|---------|---------|-------|
| C32 | 11831(4) | 7940(2) | 262(2)  | 39(1) |
| C33 | 12245(5) | 8661(2) | 542(2)  | 44(1) |
| C34 | 12440(4) | 8718(2) | 1356(2) | 37(1) |
| C35 | 11321(4) | 8281(2) | 1624(2) | 32(1) |
| C36 | 8810(4)  | 7379(2) | 3341(2) | 36(1) |
| C37 | 8630(4)  | 8136(2) | 3554(2) | 29(1) |
| C38 | 9692(4)  | 8638(2) | 3518(2) | 45(1) |
| C39 | 9540(5)  | 9318(2) | 3747(2) | 48(1) |
| C40 | 8345(5)  | 9505(2) | 4028(2) | 43(1) |
| C41 | 7275(4)  | 9015(2) | 4055(2) | 43(1) |
| C42 | 7424(4)  | 8333(2) | 3818(2) | 39(1) |
| N1  | 6094(3)  | 5718(2) | 2067(2) | 29(1) |
| N2  | 9161(3)  | 7293(2) | 2631(2) | 30(1) |
| O1  | 3721(3)  | 6055(1) | 1637(1) | 35(1) |
| O2  | 4486(3)  | 6761(1) | 3094(1) | 34(1) |
| O3  | 11587(3) | 7031(1) | 3008(1) | 37(1) |
| O4  | 10709(3) | 6293(1) | 1574(1) | 37(1) |

---

Table 3. Bond lengths [Å] and angles [°] for 1.

|          |          |          |          |
|----------|----------|----------|----------|
| C1-O1    | 1.228(4) | C15-H15A | 0.99     |
| C1-N1    | 1.369(4) | C15-H15B | 0.99     |
| C1-C2    | 1.542(5) | C16-C17  | 1.387(5) |
| C2-O2    | 1.433(4) | C16-C21  | 1.392(5) |
| C2-C3    | 1.520(5) | C17-C18  | 1.403(5) |
| C2-C9    | 1.551(5) | C17-H17  | 0.95     |
| C3-C4    | 1.380(5) | C18-C19  | 1.372(5) |
| C3-C8    | 1.397(5) | C18-H18  | 0.95     |
| C4-C5    | 1.405(5) | C19-C20  | 1.376(5) |
| C4-H4    | 0.95     | C19-H19  | 0.95     |
| C5-C6    | 1.387(5) | C20-C21  | 1.391(5) |
| C5-H5    | 0.95     | C20-H20  | 0.95     |
| C6-C7    | 1.395(5) | C21-H21  | 0.95     |
| C6-H6    | 0.95     | C22-O3   | 1.235(4) |
| C7-C8    | 1.390(5) | C22-N2   | 1.363(5) |
| C7-H7    | 0.95     | C22-C23  | 1.552(5) |
| C8-N1    | 1.416(4) | C23-O4   | 1.432(4) |
| C9-C10   | 1.501(5) | C23-C30  | 1.519(5) |
| C9-C14   | 1.536(5) | C23-C24  | 1.521(5) |
| C9-H9    | 1.00     | C24-C25  | 1.377(5) |
| C10-C11  | 1.335(5) | C24-C29  | 1.400(5) |
| C10-H10  | 0.95     | C25-C26  | 1.410(5) |
| C11-C12  | 1.505(5) | C25-H25  | 0.95     |
| C11-H11  | 0.95     | C26-C27  | 1.383(5) |
| C12-C13  | 1.523(5) | C26-H26  | 0.95     |
| C12-H12A | 0.99     | C27-C28  | 1.386(5) |
| C12-H12B | 0.99     | C27-H27  | 0.95     |
| C13-C14  | 1.515(5) | C28-C29  | 1.384(5) |
| C13-H13A | 0.99     | C28-H28  | 0.95     |
| C13-H13B | 0.99     | C29-N2   | 1.418(5) |
| C14-H14A | 0.99     | C30-C31  | 1.511(5) |
| C14-H14B | 0.99     | C30-C35  | 1.531(5) |
| C15-N1   | 1.448(4) | C30-H30  | 1.00     |
| C15-C16  | 1.518(5) | C31-C32  | 1.322(5) |

|          |          |              |          |
|----------|----------|--------------|----------|
| C31-H31  | 0.95     | C36-H36B     | 0.99     |
| C32-C33  | 1.497(5) | C37-C42      | 1.383(5) |
| C32-H32  | 0.95     | C37-C38      | 1.395(5) |
| C33-C34  | 1.522(5) | C38-C39      | 1.386(5) |
| C33-H33A | 0.99     | C38-H38      | 0.95     |
| C33-H33B | 0.99     | C39-C40      | 1.386(5) |
| C34-C35  | 1.511(5) | C39-H39      | 0.95     |
| C34-H34A | 0.99     | C40-C41      | 1.381(5) |
| C34-H34B | 0.99     | C40-H40      | 0.95     |
| C35-H35A | 0.99     | C41-C42      | 1.393(5) |
| C35-H35B | 0.99     | C41-H41      | 0.95     |
| C36-N2   | 1.460(4) | C42-H42      | 0.95     |
| C36-C37  | 1.518(5) | O2-H2O       | 1.02(5)  |
| C36-H36A | 0.99     | O4-H4O       | 0.89(4)  |
| O1-C1-N1 | 125.0(4) | C8-C7-C6     | 117.6(4) |
| O1-C1-C2 | 126.2(3) | C8-C7-H7     | 121.2    |
| N1-C1-C2 | 108.8(3) | C6-C7-H7     | 121.2    |
| O2-C2-C3 | 108.8(3) | C7-C8-C3     | 121.7(4) |
| O2-C2-C1 | 110.0(3) | C7-C8-N1     | 127.9(3) |
| C3-C2-C1 | 102.1(3) | C3-C8-N1     | 110.4(3) |
| O2-C2-C9 | 111.5(3) | C10-C9-C14   | 110.7(3) |
| C3-C2-C9 | 115.5(3) | C10-C9-C2    | 111.9(3) |
| C1-C2-C9 | 108.5(3) | C14-C9-C2    | 113.1(3) |
| C4-C3-C8 | 120.4(4) | C10-C9-H9    | 106.9    |
| C4-C3-C2 | 131.3(3) | C14-C9-H9    | 106.9    |
| C8-C3-C2 | 108.2(3) | C2-C9-H9     | 106.9    |
| C3-C4-C5 | 118.5(4) | C11-C10-C9   | 123.5(3) |
| C3-C4-H4 | 120.7    | C11-C10-H10  | 118.3    |
| C5-C4-H4 | 120.7    | C9-C10-H10   | 118.3    |
| C6-C5-C4 | 120.6(4) | C10-C11-C12  | 123.6(3) |
| C6-C5-H5 | 119.7    | C10-C11-H11  | 118.2    |
| C4-C5-H5 | 119.7    | C12-C11-H11  | 118.2    |
| C5-C6-C7 | 121.2(4) | C11-C12-C13  | 111.3(3) |
| C5-C6-H6 | 119.4    | C11-C12-H12A | 109.4    |
| C7-C6-H6 | 119.4    | C13-C12-H12A | 109.4    |

|               |          |             |          |
|---------------|----------|-------------|----------|
| C11-C12-H12B  | 109.4    | C20-C21-C16 | 121.0(4) |
| C13-C12-H12B  | 109.4    | C20-C21-H21 | 119.5    |
| H12A-C12-H12B | 108.0    | C16-C21-H21 | 119.5    |
| C14-C13-C12   | 110.3(3) | O3-C22-N2   | 124.7(4) |
| C14-C13-H13A  | 109.6    | O3-C22-C23  | 125.9(3) |
| C12-C13-H13A  | 109.6    | N2-C22-C23  | 109.4(3) |
| C14-C13-H13B  | 109.6    | O4-C23-C30  | 112.5(3) |
| C12-C13-H13B  | 109.6    | O4-C23-C24  | 108.5(3) |
| H13A-C13-H13B | 108.1    | C30-C23-C24 | 115.5(3) |
| C13-C14-C9    | 110.4(3) | O4-C23-C22  | 108.6(3) |
| C13-C14-H14A  | 109.6    | C30-C23-C22 | 110.0(3) |
| C9-C14-H14A   | 109.6    | C24-C23-C22 | 100.9(3) |
| C13-C14-H14B  | 109.6    | C25-C24-C29 | 119.6(4) |
| C9-C14-H14B   | 109.6    | C25-C24-C23 | 131.0(3) |
| H14A-C14-H14B | 108.1    | C29-C24-C23 | 109.3(3) |
| N1-C15-C16    | 114.0(3) | C24-C25-C26 | 118.8(4) |
| N1-C15-H15A   | 108.8    | C24-C25-H25 | 120.6    |
| C16-C15-H15A  | 108.8    | C26-C25-H25 | 120.6    |
| N1-C15-H15B   | 108.8    | C27-C26-C25 | 119.9(4) |
| C16-C15-H15B  | 108.8    | C27-C26-H26 | 120.0    |
| H15A-C15-H15B | 107.7    | C25-C26-H26 | 120.0    |
| C17-C16-C21   | 118.3(3) | C26-C27-C28 | 122.3(4) |
| C17-C16-C15   | 122.7(3) | C26-C27-H27 | 118.9    |
| C21-C16-C15   | 119.0(3) | C28-C27-H27 | 118.9    |
| C16-C17-C18   | 120.7(4) | C29-C28-C27 | 116.8(4) |
| C16-C17-H17   | 119.7    | C29-C28-H28 | 121.6    |
| C18-C17-H17   | 119.7    | C27-C28-H28 | 121.6    |
| C19-C18-C17   | 119.9(4) | C28-C29-C24 | 122.6(4) |
| C19-C18-H18   | 120.1    | C28-C29-N2  | 127.7(3) |
| C17-C18-H18   | 120.1    | C24-C29-N2  | 109.6(3) |
| C18-C19-C20   | 120.3(4) | C31-C30-C23 | 112.6(3) |
| C18-C19-H19   | 119.9    | C31-C30-C35 | 109.1(3) |
| C20-C19-H19   | 119.9    | C23-C30-C35 | 114.7(3) |
| C19-C20-C21   | 119.9(4) | C31-C30-H30 | 106.7    |
| C19-C20-H20   | 120.0    | C23-C30-H30 | 106.7    |
| C21-C20-H20   | 120.0    | C35-C30-H30 | 106.7    |

|               |          |               |          |
|---------------|----------|---------------|----------|
| C32-C31-C30   | 123.6(4) | C37-C36-H36B  | 108.7    |
| C32-C31-H31   | 118.2    | H36A-C36-H36B | 107.6    |
| C30-C31-H31   | 118.2    | C42-C37-C38   | 118.7(4) |
| C31-C32-C33   | 123.2(4) | C42-C37-C36   | 120.0(3) |
| C31-C32-H32   | 118.4    | C38-C37-C36   | 121.3(3) |
| C33-C32-H32   | 118.4    | C39-C38-C37   | 120.4(4) |
| C32-C33-C34   | 113.3(3) | C39-C38-H38   | 119.8    |
| C32-C33-H33A  | 108.9    | C37-C38-H38   | 119.8    |
| C34-C33-H33A  | 108.9    | C40-C39-C38   | 120.3(4) |
| C32-C33-H33B  | 108.9    | C40-C39-H39   | 119.8    |
| C34-C33-H33B  | 108.9    | C38-C39-H39   | 119.8    |
| H33A-C33-H33B | 107.7    | C41-C40-C39   | 119.7(4) |
| C35-C34-C33   | 110.9(3) | C41-C40-H40   | 120.1    |
| C35-C34-H34A  | 109.5    | C39-C40-H40   | 120.1    |
| C33-C34-H34A  | 109.5    | C40-C41-C42   | 119.8(4) |
| C35-C34-H34B  | 109.5    | C40-C41-H41   | 120.1    |
| C33-C34-H34B  | 109.5    | C42-C41-H41   | 120.1    |
| H34A-C34-H34B | 108.0    | C37-C42-C41   | 121.0(4) |
| C34-C35-C30   | 110.2(3) | C37-C42-H42   | 119.5    |
| C34-C35-H35A  | 109.6    | C41-C42-H42   | 119.5    |
| C30-C35-H35A  | 109.6    | C1-N1-C8      | 110.4(3) |
| C34-C35-H35B  | 109.6    | C1-N1-C15     | 124.7(3) |
| C30-C35-H35B  | 109.6    | C8-N1-C15     | 124.8(3) |
| H35A-C35-H35B | 108.1    | C22-N2-C29    | 110.7(3) |
| N2-C36-C37    | 114.3(3) | C22-N2-C36    | 123.9(3) |
| N2-C36-H36A   | 108.7    | C29-N2-C36    | 125.2(3) |
| C37-C36-H36A  | 108.7    | C2-O2-H2O     | 107(3)   |
| N2-C36-H36B   | 108.7    | C23-O4-H4O    | 108(3)   |

---

Table 4. Anisotropic displacement parameters ( $\text{\AA}^2 \times 10^3$ ) for 1. The anisotropic displacement factor exponent takes the form:  $-2\pi^2 [ h^2 a^{*2} U^{11} + \dots + 2 h k a^* b^* U^{12} ]$

|     | U <sup>11</sup> | U <sup>22</sup> | U <sup>33</sup> | U <sup>23</sup> | U <sup>13</sup> | U <sup>12</sup> |
|-----|-----------------|-----------------|-----------------|-----------------|-----------------|-----------------|
| C1  | 30(2)           | 19(2)           | 43(3)           | 3(2)            | 10(2)           | -1(2)           |
| C2  | 34(2)           | 21(2)           | 34(2)           | -1(2)           | 13(2)           | 1(2)            |
| C3  | 25(2)           | 21(2)           | 38(3)           | 3(2)            | 8(2)            | -1(2)           |
| C4  | 36(3)           | 30(2)           | 40(3)           | 1(2)            | 11(2)           | -5(2)           |
| C5  | 33(3)           | 42(3)           | 43(3)           | 4(2)            | -2(2)           | -4(2)           |
| C6  | 28(2)           | 41(3)           | 56(3)           | 3(2)            | 12(2)           | 0(2)            |
| C7  | 34(3)           | 32(2)           | 56(3)           | 1(2)            | 18(2)           | 3(2)            |
| C8  | 31(2)           | 20(2)           | 39(3)           | 4(2)            | 11(2)           | 0(2)            |
| C9  | 26(2)           | 24(2)           | 30(2)           | 3(2)            | 8(2)            | -2(2)           |
| C10 | 33(2)           | 23(2)           | 42(3)           | -1(2)           | 13(2)           | 0(2)            |
| C11 | 33(2)           | 36(2)           | 36(2)           | -2(2)           | 8(2)            | 3(2)            |
| C12 | 51(3)           | 28(2)           | 43(3)           | 4(2)            | 14(2)           | -7(2)           |
| C13 | 48(3)           | 23(2)           | 49(3)           | -4(2)           | 14(2)           | -6(2)           |
| C14 | 37(2)           | 24(2)           | 37(2)           | -2(2)           | 10(2)           | 1(2)            |
| C15 | 44(3)           | 28(2)           | 39(3)           | 2(2)            | 19(2)           | 3(2)            |
| C16 | 23(2)           | 33(2)           | 36(2)           | 1(2)            | 10(2)           | 1(2)            |
| C17 | 31(2)           | 33(2)           | 38(2)           | -2(2)           | 12(2)           | 5(2)            |
| C18 | 39(3)           | 29(2)           | 52(3)           | 2(2)            | 10(2)           | 5(2)            |
| C19 | 36(3)           | 33(3)           | 59(3)           | -7(2)           | 2(2)            | 5(2)            |
| C20 | 38(3)           | 50(3)           | 45(3)           | -10(2)          | 9(2)            | 12(2)           |
| C21 | 40(3)           | 41(3)           | 45(3)           | 7(2)            | 13(2)           | 6(2)            |
| C22 | 32(3)           | 17(2)           | 51(3)           | 5(2)            | 12(2)           | 0(2)            |
| C23 | 30(2)           | 21(2)           | 35(2)           | -3(2)           | 8(2)            | -3(2)           |
| C24 | 24(2)           | 23(2)           | 44(3)           | -3(2)           | 6(2)            | -4(2)           |
| C25 | 30(2)           | 34(2)           | 45(3)           | -3(2)           | 6(2)            | -2(2)           |
| C26 | 36(3)           | 34(2)           | 45(3)           | -2(2)           | -2(2)           | -5(2)           |
| C27 | 27(2)           | 28(2)           | 66(3)           | -2(2)           | 6(2)            | -2(2)           |
| C28 | 33(3)           | 25(2)           | 48(3)           | -3(2)           | 10(2)           | 1(2)            |
| C29 | 31(2)           | 22(2)           | 42(3)           | -1(2)           | 8(2)            | -2(2)           |
| C30 | 26(2)           | 23(2)           | 45(3)           | 3(2)            | 12(2)           | 2(2)            |
| C31 | 30(2)           | 35(2)           | 44(3)           | -8(2)           | 14(2)           | -2(2)           |

|     |       |       |       |        |       |        |
|-----|-------|-------|-------|--------|-------|--------|
| C32 | 38(3) | 47(3) | 33(3) | -1(2)  | 8(2)  | 0(2)   |
| C33 | 45(3) | 42(3) | 49(3) | 11(2)  | 19(2) | 2(2)   |
| C34 | 38(3) | 28(2) | 49(3) | 3(2)   | 17(2) | -1(2)  |
| C35 | 33(2) | 26(2) | 39(2) | -1(2)  | 10(2) | -1(2)  |
| C36 | 39(3) | 30(2) | 43(3) | 5(2)   | 14(2) | 4(2)   |
| C37 | 26(2) | 30(2) | 34(2) | 2(2)   | 10(2) | 3(2)   |
| C38 | 33(3) | 46(3) | 60(3) | -6(2)  | 19(2) | -4(2)  |
| C39 | 41(3) | 44(3) | 60(3) | -12(2) | 14(2) | -15(2) |
| C40 | 44(3) | 31(2) | 56(3) | -8(2)  | 12(2) | 4(2)   |
| C41 | 32(3) | 44(3) | 54(3) | -7(2)  | 13(2) | 3(2)   |
| C42 | 30(2) | 39(2) | 49(3) | -1(2)  | 13(2) | -3(2)  |
| N1  | 33(2) | 30(2) | 28(2) | 0(2)   | 13(2) | 1(2)   |
| N2  | 28(2) | 27(2) | 37(2) | 3(2)   | 13(2) | 2(2)   |
| O1  | 33(2) | 33(2) | 39(2) | 3(1)   | 6(1)  | 4(1)   |
| O2  | 35(2) | 19(1) | 51(2) | -5(1)  | 14(1) | 0(1)   |
| O3  | 31(2) | 32(2) | 45(2) | 3(1)   | 5(1)  | 7(1)   |
| O4  | 33(2) | 23(2) | 56(2) | -6(1)  | 13(2) | 2(1)   |

---

Table 5. Hydrogen coordinates ( $\times 10^4$ ) and isotropic displacement parameters ( $\text{\AA}^2 \times 10^{-3}$ ) for 1.

|      | x     | y    | z    | U(eq) |
|------|-------|------|------|-------|
| H4   | 6547  | 5995 | 4375 | 42    |
| H5   | 9044  | 5712 | 4648 | 49    |
| H6   | 10253 | 5428 | 3735 | 49    |
| H7   | 9017  | 5413 | 2524 | 47    |
| H9   | 2620  | 5722 | 2873 | 32    |
| H10  | 3683  | 6041 | 4159 | 38    |
| H11  | 3346  | 5111 | 4822 | 42    |
| H12A | 2211  | 4105 | 4203 | 48    |
| H12B | 3901  | 4017 | 4193 | 48    |
| H13A | 2726  | 3839 | 3020 | 48    |
| H13B | 1674  | 4498 | 3032 | 48    |
| H14A | 3550  | 4755 | 2388 | 39    |
| H14B | 4742  | 4623 | 3111 | 39    |
| H15A | 7485  | 5746 | 1400 | 43    |
| H15B | 5820  | 5807 | 998  | 43    |
| H17  | 6345  | 4397 | 2193 | 40    |
| H18  | 6319  | 3206 | 1875 | 48    |
| H19  | 6445  | 2885 | 710  | 52    |
| H20  | 6585  | 3739 | -147 | 53    |
| H21  | 6632  | 4923 | 166  | 50    |
| H25  | 8520  | 7069 | 315  | 44    |
| H26  | 5998  | 7312 | 102  | 48    |
| H27  | 4881  | 7528 | 1061 | 49    |
| H28  | 6204  | 7545 | 2249 | 42    |
| H30  | 12502 | 7367 | 1732 | 37    |
| H31  | 11312 | 6975 | 457  | 43    |
| H32  | 11782 | 7850 | -235 | 47    |
| H33A | 11485 | 8996 | 313  | 53    |
| H33B | 13164 | 8798 | 402  | 53    |
| H34A | 13426 | 8557 | 1586 | 45    |



|      |           |          |          |         |
|------|-----------|----------|----------|---------|
| H34B | 12343     | 9215     | 1491     | 45      |
| H35A | 10334     | 8436     | 1388     | 38      |
| H35B | 11429     | 8347     | 2150     | 38      |
| H36A | 9591      | 7161     | 3704     | 44      |
| H36B | 7898      | 7123     | 3349     | 44      |
| H38  | 10525     | 8512     | 3335     | 54      |
| H39  | 10259     | 9659     | 3711     | 57      |
| H40  | 8262      | 9967     | 4201     | 52      |
| H41  | 6440      | 9143     | 4234     | 52      |
| H42  | 6686      | 7998     | 3839     | 46      |
| H4O  | 11670(50) | 6230(20) | 1650(20) | 56(14)  |
| H2O  | 3390(60)  | 6820(30) | 3050(30) | 107(19) |

---

Table 6. Torsion angles [°] for 1.

|                 |           |                 |           |
|-----------------|-----------|-----------------|-----------|
| O1-C1-C2-O2     | -62.6(5)  | C12-C13-C14-C9  | -64.2(4)  |
| N1-C1-C2-O2     | 118.2(3)  | C10-C9-C14-C13  | 47.1(4)   |
| O1-C1-C2-C3     | -178.0(3) | C2-C9-C14-C13   | 173.5(3)  |
| N1-C1-C2-C3     | 2.8(4)    | N1-C15-C16-C17  | -13.1(5)  |
| O1-C1-C2-C9     | 59.7(4)   | N1-C15-C16-C21  | 167.3(3)  |
| N1-C1-C2-C9     | -119.6(3) | C21-C16-C17-C18 | -0.5(6)   |
| O2-C2-C3-C4     | 60.5(5)   | C15-C16-C17-C18 | 179.9(3)  |
| C1-C2-C3-C4     | 176.8(4)  | C16-C17-C18-C19 | 0.1(6)    |
| C9-C2-C3-C4     | -65.7(5)  | C17-C18-C19-C20 | -0.1(6)   |
| O2-C2-C3-C8     | -117.1(3) | C18-C19-C20-C21 | 0.4(6)    |
| C1-C2-C3-C8     | -0.9(4)   | C19-C20-C21-C16 | -0.7(6)   |
| C9-C2-C3-C8     | 116.6(3)  | C17-C16-C21-C20 | 0.8(6)    |
| C8-C3-C4-C5     | 0.2(5)    | C15-C16-C21-C20 | -179.6(4) |
| C2-C3-C4-C5     | -177.2(3) | O3-C22-C23-O4   | 64.8(5)   |
| C3-C4-C5-C6     | 0.3(6)    | N2-C22-C23-O4   | -114.3(3) |
| C4-C5-C6-C7     | -0.1(6)   | O3-C22-C23-C30  | -58.7(5)  |
| C5-C6-C7-C8     | -0.5(6)   | N2-C22-C23-C30  | 122.2(3)  |
| C6-C7-C8-C3     | 0.9(5)    | O3-C22-C23-C24  | 178.8(3)  |
| C6-C7-C8-N1     | 179.1(3)  | N2-C22-C23-C24  | -0.3(4)   |
| C4-C3-C8-C7     | -0.8(5)   | O4-C23-C24-C25  | -64.9(5)  |
| C2-C3-C8-C7     | 177.1(3)  | C30-C23-C24-C25 | 62.5(5)   |
| C4-C3-C8-N1     | -179.2(3) | C22-C23-C24-C25 | -178.9(4) |
| C2-C3-C8-N1     | -1.3(4)   | O4-C23-C24-C29  | 113.1(3)  |
| O2-C2-C9-C10    | -60.3(4)  | C30-C23-C24-C29 | -119.5(3) |
| C3-C2-C9-C10    | 64.5(4)   | C22-C23-C24-C29 | -0.9(4)   |
| C1-C2-C9-C10    | 178.4(3)  | C29-C24-C25-C26 | -0.2(5)   |
| O2-C2-C9-C14    | 173.9(3)  | C23-C24-C25-C26 | 177.6(4)  |
| C3-C2-C9-C14    | -61.3(4)  | C24-C25-C26-C27 | -0.7(5)   |
| C1-C2-C9-C14    | 52.6(4)   | C25-C26-C27-C28 | 1.0(6)    |
| C14-C9-C10-C11  | -14.8(5)  | C26-C27-C28-C29 | -0.4(5)   |
| C2-C9-C10-C11   | -141.9(4) | C27-C28-C29-C24 | -0.6(5)   |
| C9-C10-C11-C12  | -2.2(6)   | C27-C28-C29-N2  | -179.7(3) |
| C10-C11-C12-C13 | -13.5(5)  | C25-C24-C29-C28 | 0.9(5)    |
| C11-C12-C13-C14 | 45.7(4)   | C23-C24-C29-C28 | -177.4(3) |

|                 |           |                 |           |
|-----------------|-----------|-----------------|-----------|
| C25-C24-C29-N2  | -179.9(3) | C38-C37-C42-C41 | -1.0(6)   |
| C23-C24-C29-N2  | 1.9(4)    | C36-C37-C42-C41 | 176.4(4)  |
| O4-C23-C30-C31  | 57.4(4)   | C40-C41-C42-C37 | -0.1(6)   |
| C24-C23-C30-C31 | -67.9(4)  | O1-C1-N1-C8     | 177.0(3)  |
| C22-C23-C30-C31 | 178.6(3)  | C2-C1-N1-C8     | -3.8(4)   |
| O4-C23-C30-C35  | -177.1(3) | O1-C1-N1-C15    | -0.3(6)   |
| C24-C23-C30-C35 | 57.5(4)   | C2-C1-N1-C15    | 179.0(3)  |
| C22-C23-C30-C35 | -55.9(4)  | C7-C8-N1-C1     | -175.1(4) |
| C23-C30-C31-C32 | 149.6(4)  | C3-C8-N1-C1     | 3.3(4)    |
| C35-C30-C31-C32 | 21.1(5)   | C7-C8-N1-C15    | 2.2(6)    |
| C30-C31-C32-C33 | 2.3(6)    | C3-C8-N1-C15    | -179.5(3) |
| C31-C32-C33-C34 | 6.0(6)    | C16-C15-N1-C1   | -100.4(4) |
| C32-C33-C34-C35 | -38.0(5)  | C16-C15-N1-C8   | 82.7(4)   |
| C33-C34-C35-C30 | 62.6(4)   | O3-C22-N2-C29   | -177.6(3) |
| C31-C30-C35-C34 | -52.5(4)  | C23-C22-N2-C29  | 1.5(4)    |
| C23-C30-C35-C34 | -179.8(3) | O3-C22-N2-C36   | -3.4(5)   |
| N2-C36-C37-C42  | 130.9(4)  | C23-C22-N2-C36  | 175.7(3)  |
| N2-C36-C37-C38  | -51.8(5)  | C28-C29-N2-C22  | 177.1(4)  |
| C42-C37-C38-C39 | 0.4(6)    | C24-C29-N2-C22  | -2.1(4)   |
| C36-C37-C38-C39 | -177.0(4) | C28-C29-N2-C36  | 3.0(6)    |
| C37-C38-C39-C40 | 1.3(6)    | C24-C29-N2-C36  | -176.2(3) |
| C38-C39-C40-C41 | -2.4(6)   | C37-C36-N2-C22  | 106.0(4)  |
| C39-C40-C41-C42 | 1.8(6)    | C37-C36-N2-C29  | -80.6(4)  |

---

Table 7. Hydrogen bonds for 1 [ $\text{\AA}$  and  $^\circ$ ].

| D-H...A       | d(D-H)  | d(H...A) | d(D...A) | $\angle$ (DHA) |
|---------------|---------|----------|----------|----------------|
| O4-H4O...O1#1 | 0.89(4) | 1.96(4)  | 2.847(4) | 170(4)         |
| O2-H2O...O3#2 | 1.02(5) | 1.73(5)  | 2.746(4) | 172(5)         |

Symmetry transformations used to generate equivalent atoms:

#1  $x+1,y,z$  #2  $x-1,y,z$
